# Supplementary material for: Diet quality in relation to healthy ageing: the Israeli Longitudinal Study on Aging (ILSA)—a study protocol
Source: PubMed Central journal article supplement — BMJ Open. 2019 Apr 20;9(4):e024673. doi: 10.1136/bmjopen-2018-024673 (PMC6500277; doi:10.1136/bmjopen-2018-024673), 2019-04-20
Supplement: bmjopen-2018-024673.draft_revisions.pdf [file bmjopen-2018-024673.draft_revisions.pdf]

# BMJ Open

BMJ Open is committed to open peer review. As part of this commitment we make the peer review history of every article we publish publicly available.

When an article is published we post the peer reviewers' comments and the authors' responses online. We also post the versions of the paper that were used during peer review. These are the versions that the peer review comments apply to.

The versions of the paper that follow are the versions that were submitted during the peer review process. They are not the versions of record or the final published versions. They should not be cited or distributed as the published version of this manuscript.

BMJ Open is an open access journal and the full, final, typeset and author-corrected version of record of the manuscript is available on our site with no access controls, subscription charges or pay-per-view fees (<http://bmjopen.bmj.com>).

If you have any questions on BMJ Open's open peer review process please email [editorial.bmjopen@bmj.com](mailto:editorial.bmjopen@bmj.com)

# BMJ Open

## **Dietary Patterns in Relation to Healthy Aging. The Israeli Longitudinal Study on Aging (ILSA): Study Protocol.**

|                               |                                                                                                                                                                                                                                                                                                                                                                                                                                                                                                                                                                              |
|-------------------------------|------------------------------------------------------------------------------------------------------------------------------------------------------------------------------------------------------------------------------------------------------------------------------------------------------------------------------------------------------------------------------------------------------------------------------------------------------------------------------------------------------------------------------------------------------------------------------|
| Journal:                      | <i>BMJ Open</i>                                                                                                                                                                                                                                                                                                                                                                                                                                                                                                                                                              |
| Manuscript ID                 | bmjopen-2018-024673                                                                                                                                                                                                                                                                                                                                                                                                                                                                                                                                                          |
| Article Type:                 | Protocol                                                                                                                                                                                                                                                                                                                                                                                                                                                                                                                                                                     |
| Date Submitted by the Author: | 16-Jun-2018                                                                                                                                                                                                                                                                                                                                                                                                                                                                                                                                                                  |
| Complete List of Authors:     | Goshen, Abigail; Tel Aviv University, Epidemiology and Preventive Medicine<br>Goldbourt, Uri; Tel Aviv University, Epidemiology and Preventive Medicine<br>Shohat, Tamar; Tel Aviv University, Epidemiology and Preventive Medicine; State of Israel Ministry of Health, Israel Center for Disease Control<br>Shimony, Tal ; State of Israel Ministry of Health, Israel Center for Disease Control<br>Keinan-Boker, Lital; State of Israel Ministry of Health, Israel Center for Disease Control<br>Gerber, Yariv; Tel Aviv University, Epidemiology and Preventive Medicine |
| Keywords:                     | dietary patterns, elderly, frailty, longitudinal studies, EPIDEMIOLOGY                                                                                                                                                                                                                                                                                                                                                                                                                                                                                                       |
|                               |                                                                                                                                                                                                                                                                                                                                                                                                                                                                                                                                                                              |

SCHOLARONE™  
Manuscripts

# Dietary Patterns in Relation to Healthy Aging.

## The Israeli Longitudinal Study on Aging (ILSA): Study Protocol.

Abigail Goshen<sup>1</sup>, Uri Goldbourt<sup>1</sup>, Tamar Shohat<sup>1,2</sup>, Tal Shimony<sup>2</sup>, Lital Keinan-Boker<sup>2</sup>, Yariv Gerber<sup>1</sup>

1. Dept. of Epidemiology and Preventive Medicine, School of Public Health, Sackler Faculty of Medicine, Tel Aviv University, Ramat Aviv, Tel Aviv, 6997801, Israel.
2. Israel Center for Disease Control, Israel Ministry of Health, Ramat Gan, Israel.

Abigail Goshen: [abigail1@mail.tau.ac.il](mailto:abigail1@mail.tau.ac.il)

Uri Goldbourt: [goldbu1@post.tau.ac.il](mailto:goldbu1@post.tau.ac.il)

Tamar Shohat: [tamar.shohat2@moh.gov.il](mailto:tamar.shohat2@moh.gov.il)

Tal Shimony: [Tal.Shimony@moh.gov.il](mailto:Tal.Shimony@moh.gov.il)

Lital Keinan-Boker: [Lital.Keinan2@moh.gov.il](mailto:Lital.Keinan2@moh.gov.il)

Yariv Gerber: [yarivg@post.tau.ac.il](mailto:yarivg@post.tau.ac.il)

**Corresponding author:** Yariv Gerber, PhD, Department of Epidemiology and Preventive Medicine, School of Public Health, Sackler Faculty of Medicine, Tel Aviv University, Ramat Aviv, Tel Aviv, 6997801, Israel. Email: [yarivgerber@gmail.com](mailto:yarivgerber@gmail.com)

# Dietary Patterns in Relation to Healthy Aging.

## The Israeli Longitudinal Study on Aging (ILSA): Study Protocol.

**Introduction:** Population aging is accelerating rapidly in Israel as well as worldwide necessitating adaptation of the health care system and consideration of new approaches that serve the specific needs of the elderly. In addition to cognitive decline, frailty is one of the most challenging expressions of physical and mental aging, a multidimensional syndrome of increased vulnerability. Several studies have shown that low intake of certain micronutrients and protein is associated with higher risk of frailty and cognitive impairment. However, whether global dietary patterns are involved in the etiology of the latter outcomes is unclear.

**Methods and analysis:** We are conducting, among elderly subjects who took part in "MABAT ZAHAV" (Israeli National Health and Nutrition Survey of the Elderly) in 2005-2006 (T1, N=1,852) an extensive follow-up interview (T2) that includes comprehensive geriatric assessment and evaluation of general health and quality of life. Diet quality is evaluated using the Healthy Eating Index (HEI) 2010, based on 24-hour diet recall measured at T1 and T2. Frailty is assessed using two different approaches: the phenotype framework and the accumulation of deficits model. Cognitive function is assessed by Mini Mental State Examination (MMSE) and cognitive decline by the difference between repeated measurements of MMSE. Multiple logistic regression models will be constructed to evaluate the role of dietary patterns in development of frailty and cognitive decline with inverse probability weighting used to minimize attrition bias. About 600 subjects are expected to be interviewed by the end of 2019.

**Ethics and dissemination:** Ethical approval was obtained from the Helsinki Committee of Sheba Medical Center, Tel Hashomer, Israel and the Ethical Committee of Tel-Aviv University. All participants will sign an informed consent form. The findings of the study will be published in peer-reviewed journals.

**Keywords:** dietary patterns; epidemiology; elderly; frailty; longitudinal studies

## Strengths and limitations of this study

- A cohort study design with broad-spectrum data and more than a decade long follow-up will allow us to evaluate trajectories of various functioning, cognitive, behavioral and social health outcomes, and assess their determinants in the elderly population of Israel.
- Only few studies have explicitly examined the concept of robust aging among the oldest-old, the most rapidly expanding segment of the population, and investigated its heterogeneity.
- Selection bias due to death, loss to follow-up and non-response.
- Nutritional assessment is based on a single 24-hour dietary recall.
- Self-reported data leading to misclassification bias.

## Background

### Healthy aging

Population aging is accelerating rapidly in Israel as well as worldwide necessitating adaptation of the health care system and consideration of new approaches that serve the specific needs of the elderly<sup>1</sup>. According to current forecasts the percentage of persons 65 years and older will increase from 8.5% at 2015 to 19% by 2030<sup>2</sup>. The concept of healthy aging is generally described as optimizing opportunities for improving and preserving health and physical, social, and mental wellness; independence; quality of life; and enhancing successful life-course transitions<sup>3</sup>. While this definition depicts healthy aging or successful aging as a complex process of adaptation to changes across the lifespan, the concept needs to be looked at in terms of a measurable outcome that can be empirically validated<sup>4</sup>. Despite the differences in healthy aging definitions, there is some consensus in the studies that 'successful ager' outcome should measure the capacity to function well in domains of cognitive, physical and mental well-being<sup>4</sup>.

### Frailty

Frailty is internationally recognized as an important medical syndrome that describes the heterogeneity of vulnerability in older people<sup>5</sup>. Frail older persons are at high risk of accelerated physical and cognitive functional decline, disability, and death<sup>6</sup>. The concept of frailty adopts an integrative approach which represents general properties of aging and health rather than particular functional deficiency or decline<sup>7</sup>. Assessment of frailty has implications both for the individual and on society at large, forecasting healthcare use<sup>8,9</sup> and providing opportunities for preventive intervention<sup>10,11</sup>, thus making it a key issue in chronic disease management and healthy aging<sup>12,13</sup>.

1  
2  
3 Studies show that an assessment of frailty can delay the development of disability and reduce the  
4 need for nursing among elderly people living at home<sup>7</sup>. Based on 21 cohorts involving 61,500  
5 participants, on average, 11% of community-dwelling subjects aged 65 and older are defined frail  
6 and another 42% prefrail<sup>14</sup>. Nevertheless, the reported prevalence differed substantially, ranging  
7 from 4% to 59% due to different definitions and measurements of frailty status. Methods to measure  
8 frailty vary widely throughout the literature<sup>5 15-19</sup>, with two principal models of frailty emerging: **(1)**  
9 The Fried and colleagues' *Biological Phenotype* framework<sup>15</sup>, which conceptualizes frailty as a  
10 biologic syndrome characterized by a decline in overall function and loss of resistance to stressors.  
11 This model is comprised of five physical indicators including low physical activity, weak grip  
12 strength, slow walking speed, exhaustion, and unintentional weight loss.  
13  
14 **(2)** The Rockwood and colleagues' *Accumulation of Deficits* Index<sup>20</sup>, which defines frailty as the  
15 cumulative effect of individual deficits. Under this model, frailty is measured by ~40 parameters of  
16 symptoms, signs, disease states and disabilities, collectively referred to as deficits. The index is a  
17 calculation of the presence or absence of each deficit as a proportion of total<sup>8</sup>.  
18  
19  
20  
21  
22  
23  
24  
25  
26

### 27 **Cognitive decline**

28 The field of aging and dementia is focusing on the characterization of the earliest stages of cognitive  
29 impairment. Mild cognitive impairment (MCI) is a recently described syndrome that is currently  
30 thought of as a transition phase between healthy cognitive aging and dementia<sup>21</sup>. Prevalence rates for  
31 age-associated memory impairment in population-based studies range from 17% to 34%, mostly vary  
32 as a result of different diagnostic criteria as well as different sampling and assessment procedures<sup>22</sup>.  
33 Clinical study results indicate that elderly individuals with MCI will progress to Alzheimer's Disease  
34 (AD) at a rate of 10% to 15% per year, compared with healthy control subjects who convert at a rate  
35 of 1% to 2% per year<sup>23</sup>, making it an area of intense interest for theoretical and practical reasons. A  
36 widely recognized instrument for detection of cognitive impairment is the Mini Mental State  
37 Examination (MMSE)<sup>24 25</sup>. The MMSE consists of thirty questions and has a maximum score of 30  
38 points. Cognitive decline definition among prospective studies varies<sup>26</sup> with a more commonly used  
39 method which define cognitive decline as the 10% of the sample who declined the most (i.e. the 90<sup>th</sup>  
40 percentile of decline). Such a population-based cutoff point has been shown to be sensitive and  
41 specific indicator of cognitive decline<sup>27</sup> and has been used in different studies<sup>28-31</sup>.  
42  
43  
44  
45  
46  
47  
48  
49  
50  
51

### 52 **Nutrition**

53 Nutrition is an important element of health in the older population that affects and is affected by the  
54 aging process<sup>32 33</sup>. Malnutrition is highly prevalent among the elderly and associated with a general  
55  
56  
57  
58  
59  
60

1  
2  
3 decline in physical and mental functioning, higher hospitalization rate and increased mortality<sup>32</sup>.  
4 Eating patterns of various cultures around the world have been associated with risk for chronic  
5 diseases<sup>34</sup>. Accordingly, several countries have issued dietary recommendations aimed at chronic  
6 disease prevention<sup>35</sup>. However, little is known about the interactive effects of dietary behavior and  
7 diet quality on overall risk, as food and nutrients are not eaten in isolation. Consequently, indices of  
8 dietary quality, patterns, and variety are increasingly used by nutritional epidemiologists<sup>36</sup>. The  
9 Healthy Eating Index-2010 (HEI-2010)<sup>37</sup> is such an index, originally released in 1995 and then  
10 updated in 2010 by the US Department of Agriculture (USDA) as a measure of diet quality. The  
11 concept of nutritional deficiency as a determinant of frailty development is not new but whether it is a  
12 predictor or consequence of frailty has not been investigated adequately<sup>38</sup>. Several studies have  
13 shown that low intake of certain micronutrients and protein is associated with higher risk of  
14 developing frailty. However, very few studies have assessed the effect of overall dietary patterns on  
15 frailty<sup>39</sup>. Two studies have suggested that increasing adherence to Mediterranean diet (MD, a diet  
16 characterized by high intake of fish, vegetables, legumes, fruits, cereals, and unsaturated fatty acids  
17<sup>40</sup>) is associated with decreasing risk of frailty among community-dwelling older adults in Spain and  
18 Italy<sup>41 42</sup>. In both studies, however, the MD was defined from sample-specific scores; thus, only the  
19 relative but not the absolute effect of MD was assessed, and the results of these studies are difficult to  
20 compare across populations. In addition, it was recently demonstrated that higher adherence to MD is  
21 associated with lower AD risk<sup>43 44</sup>.  
22  
23  
24  
25  
26  
27  
28  
29  
30  
31  
32  
33  
34  
35  
36  
37  
38  
39  
40  
41  
42  
43  
44  
45  
46  
47  
48  
49  
50  
51  
52  
53  
54  
55  
56  
57  
58  
59  
60

## **Research Objective**

### **General objective**

Investigate the relation between dietary patterns and healthy aging.

### **Specific aims**

**A.** Develop a frailty index based on "Mabat Zahav" data (T1) and evaluate its association with cause-specific mortality categories.

**B.** Investigate long-term trajectory of dietary patterns and nutritional status among study participants and examine its determinants.

**C.** Assess development of frailty among current study participants and examine its determinants, particularly dietary patterns.

**D.** Assess development of cognitive decline among current study participants and examine its determinants, particularly dietary patterns.

## **Methods/Design**

### **Research design**

The study employs a cohort study design. It constitutes the second interview (T2) of Mabat Zahav study- briefly described in the following section<sup>45</sup>. The study questionnaire duplicates most parts of the original (T1) interview (Fig. 1). In addition, measurements pertaining to frailty status are performed, as well as multidimensional scale of perceived social support (MSPSS)<sup>46</sup>, geriatric depression scale (GDS)<sup>47</sup> and the short form of health-related-quality of life (SF-12)<sup>48</sup>. The HEI-2010, a measure of diet quality, is retrospectively assessed at T1 and, prospectively, at T2 in order to assess changes in diet quality and composition. Frailty at T1 is retrospectively assessed through the Rockwood and colleagues' Deficit Index<sup>20 49</sup> and prospectively at T2 by both the Deficit Index and the Fried and colleagues' Biological Phenotype framework<sup>15</sup>. The former will be developed according to published criteria<sup>50</sup>. Follow-up of cancer and mortality incidence, overall and across specific categories, will be conducted among T1 participants through linkage to the Israeli National Cancer Registry (INCR) and the nationwide database of causes of death (compiled by the Central Bureau of Statistics) via their national identification numbers.



### **"Mabat Zahav" survey – study population**

The First National Health and Nutrition Survey of the elderly aged 65 and over in Israel ("Mabat Zahav") was carried out in 2005-2006 by the Israel Center for Disease Control (ICDC) and the Nutrition Department of the Israel Ministry of Health. The survey population was a random sample of Israeli citizens age  $\geq 65$  years old. The sampling framework was provided by the two major health funds, Clalit Health Services and Maccabi Health Services, which represent 86.3% of all the elderly citizens in Israel. Oversampling was carried out in the Arab population to ensure a sample large enough to carry out statistical analyses and comparisons with the Jewish sector. The survey included 1,852 participants (1,536 Jews and 316 Arabs) residing in Israel, in the community who had lived in the country for at least one year in urban and rural settlements with more than 20,000 residents. Exclusion criteria included: significant cognitive reduction-MMSE $<17$ , current hospitalization for more than 6 months, hospitalization in a psychiatric institution, and hospitalization in a long-term-care institution. Survey methods included a personal interview in the interviewees' homes or sheltered accommodation using a structured questionnaire. The interviews were held in multiple languages and the questionnaires were translated accordingly: 1277 (69%) interviews took place in Hebrew, 316 (17%) in Arabic, 257 (14%) in Russian and 2 (0.1%) in English. The data collected on the survey included information regarding health and nutrition status, health behaviors (physical activity, alcohol consumption, medication use, use of nutrition supplements), knowledge and attitudes regarding nutrition, and utilization of health services among this population<sup>45</sup>. All data collected from 1,799 subjects are available on-line at the ministry of health government web site<sup>51</sup>.

### **Exclusion criterion in current research stage:**

Significant cognitive reduction as measured by MMSE score of less than 17 or inability to communicate.

## Sample size

Among T1 initial participants (1,852), 1,799 (1,499 Jews and 300 Arabs) questionnaires were included in the survey final analysis. Forty-six participants (29 Jews and 17 Arabs) had a MMSE score of less than 17 (after adjustment for age and education) and seven questionnaires were only partially completed and therefore excluded from the statistical analysis. According to the mortality registry of the Ministry of Health, 1,115 participants were alive in February 2017. We assume that 25% of candidates will be unable to participate due to either exclusion criteria or severe medical condition and another 20% could not be contacted due to address or telephone number changes. We expect a response rate of 55%-60% among the remaining candidates for the T2 interview, and so about 600 subjects are expected to be re-interviewed (Fig.2). Our efforts to maximise recruitment include the following steps:

Disconnected phone numbers and no response: **a.** Locating address changes via the Ministry of Interior database. **b.** Conducting search by the Israeli non-commercial telephone directory according to city of residence and family name only (in case of incorrect street name). **c.** Conducting 10 attempts to contact each non-response on different days and hours.

Refusal: We are trying to encourage cooperation by: **a.** Offering to conduct interviews 7 days a week, morning times and afternoons. **b.** Offering to divide the interview to two separate times, in case the length of the interview is a concern for the participant. **c.** Request to try re-appeal in a few weeks or month.

## Data collection

A personal interview is conducted in the interviewees' homes by trained interviewers using a structured questionnaire. Anthropometric measurements are performed using standardized protocols. Interviews are conducted in Hebrew, Arabic or Russian. Estimated time of an interview is an hour and a half. In case the participant is unable to complete the questionnaire by himself/herself, but still meets inclusion criteria, information from a proxy is obtained regarding dietary intake, chronic diseases and co-morbidities, activities of daily living (ADL), sociodemographic status and medication use. The proxy interview does not include the following assessments: GDS, SF-12, MSPSS and self-rated health. All data (except the 24-hours dietary recall) are collected using KoBotoolbox<sup>52</sup> software which is a freely available application to design surveys for data collection through smart devices and run on android based platforms. The data are exported into password protected Excel file on a daily basis. All responses are typed directly during the interview through Lenovo TAB2 A10-30 tablet. The 24-hours dietary recall is hand written and typed later to

1  
2  
3 "Tzamert" program<sup>53</sup>, an Israeli nutrient data program, which enables recording of food intake and  
4 calculation of nutrient intake. In case of any technical difficulties the questionnaire is completed  
5 manually by the interviewer. A pilot study (n=30) was conducted, after which questionnaires,  
6 research tools and protocol were finalized.  
7  
8

9  
10 Exposure variable: The HEI-2010 score at baseline (T1): Dietary data from the 24-hour dietary recall  
11 questionnaire was entered into the "Tzamert" program. The program uses the nutrient data in the  
12 BINAT program- the Israeli nutrient database which is maintained and updated by the Nutrition  
13 Department of the Ministry of Health. A HEI-2010 score<sup>36 54</sup> will be calculated for T1 and T2  
14 interviews separately. The HEI-2010 has twelve components, nine of which assess adequacy of the  
15 diet, including 1) total fruit; 2) whole fruit; 3) total vegetables; 4) greens and beans; 5) whole grains;  
16 6) dairy; 7) total protein foods; 8) seafood and plant proteins; and 9) fatty acids. The remaining three:  
17 refined grains, sodium, and empty calories, assess dietary components that should be consumed in  
18 moderation. For each component, the respondents receive a minimum score of 0 and a maximum  
19 score of 5 or 10 (for perfect adherence to recommendations); intermediate degrees of adherence are  
20 calculated proportionately. Thus, the overall index has a range from 0 (worst) to 100<sup>36 54</sup>.  
21  
22  
23  
24  
25  
26  
27  
28

29 Nutritional status assessments:

30  
31 (1) Dietary recall: The multiple-pass 24-hour dietary recall questionnaire is administrated. The  
32 method was originally developed by the USDA in order to limit the extent of underreporting that  
33 occurs with self-reported food intake<sup>55</sup>. The interviewer uses three distinct passes to gather  
34 information about a subject's food intake during the preceding 24 hours. The first pass is termed  
35 the *quick list*, here the interviewees are asked to recall all they had eaten and drunk in the 24-hour  
36 period that preceded the interview. The second pass is termed the *detailed description*. In this  
37 pass the interviewees are asked to clarify any foods mentioned in the quick list. The third pass is  
38 termed the *review*. The interviewer reviews the list of foods mentioned and probes for additional  
39 eating occasions and clarifies food portion sizes<sup>55</sup>. In order to assist the interviewees in  
40 identifying food types and quantities during the interview, the interviewers use the "Food and  
41 Food Quantities Guide" which is partially based on the Food Guide of the USDA. The guide  
42 includes detailed questions on foods, as well as many photographs of Israeli foods. In order to  
43 facilitate quantification of amounts consumed, the interviewers use, in addition to the guide,  
44 identification aids such as a measuring cup, tablespoon and teaspoon.  
45  
46  
47  
48  
49  
50  
51  
52  
53  
54  
55  
56  
57  
58  
59  
60

- 1  
2  
3 (2) Food security: Household food security is defined as a situation whereby all household members  
4 have access at all times to a food supply which is adequate for a healthy active life. Food security  
5 is assessed using the short 6-item food security USDA questionnaire <sup>56</sup>.  
6  
7 (3) Malnutrition risk: Modified Mini Nutritional Assessment– Short Form (MNA-SF) <sup>57</sup>. The 6-item  
8 questionnaire is a nutritional screening tool that assess malnutrition risk.  
9  
10

### 11 Outcome variables:

12 Frailty assessment: Frailty at T1 and T2 is assessed by the *Deficit Index* model <sup>20 49</sup>. Under this  
13 model, frailty is measured by ~40 parameters of symptoms, signs, disease states and disabilities,  
14 collectively referred to as deficits. Adapting the Rockwood index of accumulation of deficits method  
15 <sup>7</sup> with T1 data, a Frailty Index (FI) was developed comprising 33 variables. The FI at T2 will  
16 comprise the same variables and will serve as outcome measure. The FI is a calculation of the  
17 presence or absence of each deficit as a proportion of the total. Dichotomous items are coded as 0 if  
18 the deficit is absent and as 1 if it is present, while ordinal variables are graded into a score between 0  
19 and 1 (0 representing no impairment, 0.5 for minor impairment, and 1 for major impairment). Scores  
20 are then summed up and divided by the total number of variables, yielding a frailty index between 0  
21 and 1, with 1 representing the greatest frailty (a threshold of  $\geq 0.25$  is typically used to define frailty)  
22 <sup>58</sup>. Frailty at T2 is additionally assessed by the *Biological Phenotype* model <sup>15</sup>. Frailty using this  
23 instrument is identified by the presence of three or more of the following components: 1. Shrinking:  
24 weight loss, unintentional, of more than 4.5 Kg, or more than 5% of body weight, in previous year;  
25 2. Weakness: grip strength in the lowest 20% (adjusted for sex and body mass index); 3. Poor  
26 endurance and energy: as indicated by self-report of exhaustion; 4. Slowness: the slowest 20% of the  
27 participants in the sample, based on time of a 5-meter walk (adjusted for sex and standing height); 5.  
28 Low physical activity level: a weighted score of kilocalories expended per week will be calculated  
29 based on a Physical Activity Scale for the Elderly (PASE) questionnaire <sup>59</sup>. The lowest quintile of  
30 physical activity will be identified for each gender.  
31  
32  
33  
34  
35  
36  
37  
38  
39  
40  
41  
42  
43  
44  
45

46 Cognitive assessment: Cognitive status is evaluated using the MMSE <sup>24</sup>, which can be administered  
47 in 5-10 minutes. The maximum score is 30. The questions typically have been grouped into seven  
48 categories, each representing a different cognitive domain or function: orientation to time (5 points);  
49 orientation to place (5 points); registration of three words (3 points); attention and calculation (5  
50 points); recall of three words (3 points); language (8 points) and visual construction (1 point) <sup>60</sup>. The  
51 MMSE scores will be education- and age-standardized <sup>61</sup>. Some participants cannot complete test  
52 items due to physical disability. Items that the participant cannot complete will not be included in the  
53  
54  
55  
56  
57  
58  
59  
60

1  
2  
3 total score. The MMSE will be scored out of the items that can be tested<sup>62</sup>. Cognitive impairment  
4 will be defined as a score < 24<sup>63</sup>. Cognitive decline will provide the outcome variable and will be  
5 calculated as the MMSE score difference between 2005 and 2017.  
6  
7  
8  
9

10 Other covariates:

11 Health status evaluation: The questionnaire includes data on self-rated health (current status and  
12 recent trajectories), chronic diseases and co-morbidities (e.g. cardiovascular diseases, Parkinson's  
13 disease, respiratory diseases, renal disease, cancer, glaucoma and cataract, diabetes mellitus,  
14 osteoporosis, hypertension). In addition, the questionnaire includes demographic details, alcohol  
15 consumption and smoking habits information.  
16  
17  
18  
19

20  
21 Assessment of disabilities: Function is assessed by the Katz scale of Activities of Daily Living<sup>64</sup>  
22 based on ability to dress, shower/bathe, sit down and rise from a chair, eat and go to the bathroom.  
23 The maximum score is 15, with a score of 5 indicating "no functional limitations", a score of 6-10  
24 indicating some functional limitations, and a score of 11 or more indicating several functional  
25 limitations.  
26  
27  
28  
29

30  
31 Psychosocial assessments: Assessments include depression, perceived social support and health-  
32 related quality of life (SF-12). Depression is evaluated via a 5-item short form of the Yesavage  
33 geriatric depression scale (GDS)<sup>47</sup>. A score of 2 or higher indicates possible depression. Social  
34 support is assessed through the Multidimensional Scale of Perceived Social Support (MSPSS)<sup>65</sup>, a  
35 12-item questionnaire designed to measure perceptions of support from three sources: family, friends  
36 and a significant other (4 items for each source). Answers are given on a 1-7 scale. Weighted scores  
37 are calculated by averaging the specific items, each scale (source) individually and the entire  
38 questionnaire. A high score represents a high level of perceived social support. Health-related quality  
39 of life is evaluated via a short form of a multidimensional measure of health-related quality of life  
40 SF-12<sup>48</sup>, physical (PCS) and mental (MCS) component scores will be constructed from SF-12, using  
41 standard (U.S.) and country-specific scoring algorithms.  
42  
43  
44  
45  
46  
47  
48  
49

50  
51 Drugs: The participants are asked about any medication use on a regular basis (prescription as well  
52 as over-the-counter drugs). In the preliminary letter, the participants are asked to prepare their  
53 regular medication list. Medications are coded using the ATC (Anatomical Therapeutic and  
54 Chemical) system, developed by the World Health Organization (WHO)<sup>45</sup>.  
55  
56  
57  
58  
59

1  
2  
3  
4 Anthropometric measurements: Include standing height and weight, ulna length (to calculate height,  
5 using recognized formulae), waist and mid upper arm circumference. Weight measurements are  
6 carried out using an analog scale suitable for weighing up to 130 kg, with accuracy to 0.5 kg. The  
7 scales are placed on an uncarpeted floor and calibrated before weighing. Height is measured using a  
8 spring coil measuring tape. Waist circumference is measured using a flexible tape, with ability to  
9 measure up to 150 cm, at the narrowest part of the torso, where a "fold" is created when bending  
10 sideways<sup>45</sup>. Mid upper arm circumference is measured at the mid-point between the tip of the  
11 shoulder and the tip of the elbow (olecranon process and the acromion) using a flexible tape<sup>66</sup>.  
12  
13  
14  
15  
16  
17  
18

19 Blood pressure and pulse measurements: The interviewers are conducting blood pressure and pulse  
20 measurements using an electronic monitor. The measurements are carried out according to a protocol  
21 based on recommendations of the American Heart Association<sup>67</sup>. Sitting blood pressure and pulse  
22 are measured in the right arm and is carried out twice, with a minute rest in-between. In case of a  
23 difference of 10% or more between measurements of either systolic or diastolic pressure, a third  
24 measurement is carried out. The final value will be the mean of measurements.  
25  
26  
27  
28  
29

30 Cancer incidence and cause of death: Original participants were linked to the INCR and the  
31 nationwide database of causes of death (compiled by the Central Bureau of Statistics) via their  
32 national identification numbers. Data supplied by the INCR include diagnosis code and date of  
33 diagnosis. Mortality information is managed by the Ministry of Health. Since 1999, deaths are coded  
34 according to the International Classification of Diseases, Tenth Edition (ICD-10). Cause-specific  
35 mortality categories were divided to cardiovascular disease (CVD) deaths and non-CVD deaths.  
36 According to classification used by the American Heart Association<sup>68</sup>, CVD death are divided into 3  
37 categories: coronary heart disease (CHD), diseases of the heart and diseases of the circulatory system  
38 (ICD-10: I00-I99).  
39  
40  
41  
42  
43  
44  
45

#### 46 **Quality assurance**

47  
48 Quality assurance is carried out in various ways: (1) A pilot study (n=30) was conducted, after which  
49 questionnaires and research tools were finalized; (2) Interviewer training: A 2-day seminar were  
50 designed and included standard procedures of administrating research questionnaires, performing  
51 anthropometric measurements and handling data in general; (3) All interviews (under interviewee  
52 consent) are recorded; (4) The study coordinator randomly monitor 5-10% of all interviews; (5)  
53 Intermediate data analysis will include division per each interviewer in order to assess potential  
54  
55  
56  
57  
58  
59  
60



1  
2  
3 differences; (6) Dietary data quality assurance includes: **a.** a food recall check: time sequence,  
4 completeness of information, matching of the items in the "Quick List" with those in the  
5 "Comprehensive List", and **b.** following data entry into the Tzamert program, testing will be  
6 performed for outliers, inappropriate quantities, lack of correlation between meal times and types,  
7 and missing quantities and incorrect coding.  
8  
9  
10

### 11 12 13 **Statistical analysis according to specific aims**

14 Analyses will be performed using SAS version 9.4 (SAS Institute Inc, Cary, NC), IBM SPSS version  
15 25 (SPSS, Chicago, IL) and R version 3.2.3 (R Development Core Team).  
16  
17

- 18  
19 **A.** Frailty categories assessed at baseline (T1; frail vs. Robust) will serve as the exposure variable.  
20 Baseline characteristics across frailty index categories will be compared by chi-squared test for  
21 categorical variables and student-t test for continuous variables. Cox proportional hazards  
22 regression models<sup>69</sup> will be fitted to evaluate the hazard ratios for death and other time-to-event  
23 outcomes associated with baseline exposure groups. Several adjustment methods will be applied  
24 including traditional multivariable adjustment and propensity score adjustment<sup>70</sup>. The  
25 incremental discriminatory ability of frailty index over demographic and SES variables in  
26 predicting death during a 12-year follow up will be evaluated by the c-statistic. Assessing the c-  
27 statistic and its corresponding standard error from Cox proportional hazards models will be  
28 performed with a methods proposed by Harrell et al<sup>71</sup>.  
29  
30  
31  
32  
33  
34  
35 **B.** Descriptive statistics will include prevalence of malnutrition risk as assessed at T2. Current  
36 nutritional consumption (T2) will be compared with recommendations using student-t test for  
37 continuous variables<sup>72</sup>. Characteristics across nutritional consumption across HEI categories  
38 (e.g., tertiles) will be compared by chi-squared test for categorical variables and analysis of  
39 variance for continuous variables. In order to investigate different determinants of longitudinal  
40 changes in diet quality (as measured by the difference between two HEI scores), we will use  
41 generalized linear model<sup>73</sup> and multivariable logistic regression models, as appropriate. Of the  
42 1,799 participants in the original survey, many are no longer able to participate in T2 interview  
43 (death, loss to follow-up, non-response). Because frailty status could not be assessed among the  
44 latter group, selection bias is introduced<sup>74</sup>. This bias will be addressed through an adaptation of a  
45 marginal structural model, applying inverse probability weights<sup>74 75</sup>. Accordingly, the probability  
46 of original participants to take part at the second interview will be estimated. Each observation  
47 will then be weighted by the reciprocal (i.e., the inverse) of the predicted probability of  
48 participating at T2.  
49  
50  
51  
52  
53  
54  
55  
56  
57  
58  
59  
60

- 1  
2  
3 C. Frailty among current study participants (T2) will be assessed by two methods and Weighted  
4 Kappa will be used to assess the agreement in the results of the two methods that measure frailty  
5 <sup>76</sup>. Baseline characteristics across HEI categories (lower vs. upper diet score tertiles) as measured  
6 at T1 will be compared by chi-squared test for categorical variables and analysis of variance for  
7 continuous variables. The predictive role of nutritional indices in long-term incidence of frailty  
8 will be assessed using multivariate logistic regressions models <sup>77</sup>. Frailty categories, assessed at  
9 follow-up (T2), will be treated as dichotomous outcome (frail vs. robust). We will exclude  
10 participants who were frail at baseline. Selection bias will be addressed through an adaptation of  
11 a marginal structural model, applying inverse probability weights <sup>74 75</sup> as described above.  
12 Adjustment will be made for sociodemographic, clinical, and psychosocial variables, via either  
13 multivariable adjustment or propensity score <sup>78</sup>.
- 14  
15  
16  
17  
18  
19  
20  
21 D. In order to investigate dietary patterns and their potential role in cognitive longitudinal changes  
22 we will consider several methods for defining cognitive decline as they vary considerably <sup>26</sup> and  
23 compare results using different definitions. We will exclude participants with cognitive  
24 impairment at baseline (MMSE score < 24). The predictive role of nutritional indices in cognitive  
25 changes will be assessed using generalized linear model <sup>73</sup> or multiple logistic regressions models  
26 <sup>77</sup> depending on cognitive decline definition method used. Several adjustment methods will be  
27 applied including multivariable adjustment or propensity score <sup>78</sup>. Selection bias will be addressed  
28 through an adaptation of a marginal structural model, applying inverse probability weights <sup>74 75</sup> as  
29 described above.  
30  
31  
32  
33  
34  
35

### 36 Approach to missing data

37 Missing values for the variables comprising the frailty index will be imputed using multiple  
38 imputation methodology <sup>79</sup>. The number of complete (imputed) datasets will be defined by the  
39 following formula:  $(1+\lambda/m)^{-1} = \text{efficiency}$ , where  $\lambda$  is the fraction of missing information and  $m$  the  
40 number of datasets to impute. We will assume an efficiency of 0.975. Missing values will be  
41 replaced by imputed values based on models incorporating demographic, socioeconomic,  
42 psychosocial, and clinical variables. The results of these datasets will then be combined using  
43 Rubin's rules <sup>79</sup>.  
44  
45  
46  
47  
48  
49

### 50 Estimated statistical power

51 Among 1,800 initial participants, some 1,115 survived so far. Assuming a response rate of 55% for  
52 the T2 interview, about 600 subjects are expected to be re-interviewed. Considering an estimated  
53 average age of 84 years in the T2 interview, with a reported frailty prevalence of over 35% at that  
54  
55  
56  
57  
58  
59



1  
2  
3 age<sup>80</sup>, about 250 frail subjects can be expected. This sample size is sufficient for detecting an  
4 adjusted odds ratio for frailty of  $\leq 0.60$  between the upper vs. lower HEI score tertiles (significance  
5 level at 5% and power of 80%). A previous study showed after a 6-year follow-up, that higher  
6 adherence to MD diet was associated with lower odds of developing frailty [OR = 0.30 (95% CI:  
7 0.14, 0.66)]<sup>42</sup>.  
8  
9  
10

### 11 **Patient and Public Involvement**

12 Patients and or public were not involved.  
13  
14  
15

### 16 **Ethical aspect**

17 Ethical approval for the study was obtained from the Helsinki Committee of Chaim Sheba Medical  
18 Center at Tel Hashomer and the Ethical Committee of Tel-Aviv University (Appendix A). Potential  
19 participants receive a preliminary letter with a description of the study, a request to participate and an  
20 announcement that telephone contact would be made in the near future. In addition, the letter  
21 provides the telephone number of the research coordinator for further questions. After a minimum of  
22 two weeks, potential participants are contacted by telephone in order to set an interview appointment  
23 for those who agree to participate. The interview does not involve clinical procedures and no human  
24 biological specimens are collected. Therefore, participants' burden is minimal. Each interviewee is  
25 asked to sign an informed consent form.  
26  
27  
28  
29  
30  
31  
32  
33

### 34 **Dissemination**

35 The findings of the study will be published in peer-reviewed journals and will be presented at  
36 national and international conferences.  
37  
38  
39

### 40 **Discussion**

41 The ILSA sets out to transform a large national survey of the elderly with a broad-spectrum data into  
42 a cohort study with specific age-related questionnaire including comprehensive geriatric assessment,  
43 evaluation of general health and quality of life. Obtaining data at two points in time, more than a  
44 decade apart, allows us to evaluate long-term trajectories in elderly population and examine dietary  
45 trajectories in the context of healthy aging and adverse clinical outcomes. Participants' estimated  
46 current mean age of 84 years old, defined as the "oldest-old", have over past decades been the most  
47 rapidly expanding segment of the population in developed countries and also the most susceptible to  
48 disease and disability<sup>81</sup>. Only few studies have explicitly examined the concept of robust aging  
49 among the oldest-old and investigated its heterogeneity in functioning, cognitive abilities, diet  
50  
51  
52  
53  
54  
55  
56  
57  
58  
59  
60

1  
2  
3 quality and nutritional status changes. Both frailty and cognitive decline are at the core definition of  
4 healthy aging and are highly prevalent in older people; still, as their status varies considerably among  
5 elderly people, important issues such as how they develop, are they preventable, and can they be  
6 detected reliably have yet to be defined. Examining the role of nutritional dietary pattern in the  
7 context of healthy aging and adverse clinical outcomes may help to broaden our knowledge  
8 regarding the elderly population, provide scientific basis on which policy makers can rely and pave  
9 the way for early therapeutic interventions.  
10  
11  
12  
13  
14  
15  
16  
17  
18  
19  
20  
21  
22  
23  
24  
25  
26  
27  
28  
29  
30  
31  
32  
33  
34  
35  
36  
37  
38  
39  
40  
41  
42  
43  
44  
45  
46  
47  
48  
49  
50  
51  
52  
53  
54  
55  
56  
57  
58  
59  
60

For peer review only

## **Reference:**

1. Keehan SP, Lazenby HC, Zezza MA, et al. Age Estimates in the National Health Accounts. *Health Care Financ Rev* 2004;26(2):1-16. [published Online First: 2004/01/01]
2. Bureau USC. Population Projections of the United States by Age, Sex, Race, and Hispanic Origin: 1995 to 2050: U.S. Census Bureau, 2004.
3. Peel NM, McClure RJ, Bartlett HP. Behavioral determinants of healthy aging. *Am J Prev Med* 2005;28(3):298-304. doi: 10.1016/j.amepre.2004.12.002
4. Peel N, Bartlett H, McClure R. Healthy ageing: how is it defined and measured? *Australas J Ageing* 2004;23(3):115-19. doi: 10.1111/j.1741-6612.2004.00035.x
5. Rodriguez-Manas L, Feart C, Mann G, et al. Searching for an operational definition of frailty: a Delphi method based consensus statement: the frailty operative definition-consensus conference project. *J Gerontol A Biol Sci Med Sci* 2013;68(1):62-7. doi: 10.1093/gerona/gls119 [published Online First: 2012/04/19]
6. Ferrucci L, Guralnik JM, Studenski S, et al. Designing randomized, controlled trials aimed at preventing or delaying functional decline and disability in frail, older persons: a consensus report. *Journal of the American Geriatrics Society* 2004;52(4):625-34. doi: 10.1111/j.1532-5415.2004.52174.x [published Online First: 2004/04/07]
7. Mitnitski AB, Mogilner AJ, Rockwood K. Accumulation of deficits as a proxy measure of aging. *ScientificWorldJournal* 2001;1:323-36.
8. Garcia-Gonzalez JJ, Garcia-Pena C, Franco-Marina F, et al. A frailty index to predict the mortality risk in a population of senior Mexican adults. *BMC Geriatr* 2009;9:47. doi: 10.1186/1471-2318-9-471471-2318-9-47 [pii] [published Online First: 2009/11/06]
9. Rockwood K, Howlett SE, MacKnight C, et al. Prevalence, attributes, and outcomes of fitness and frailty in community-dwelling older adults: Report from the Canadian study of health and aging. *J Gerontol A Biol Sci Med Sci* 2004;59(12):1310-17. [published Online First: 2005/02/09]
10. Freiheit EA, Hogan DB, Eliasziw M, et al. Development of a frailty index for patients with coronary artery disease. *Journal of the American Geriatrics Society* 2010;58(8):1526-31. doi: 10.1111/j.1532-5415.2010.02961.x [published Online First: 2010/07/17]
11. Song X, Mitnitski A, Rockwood K. Prevalence and 10-year outcomes of frailty in older adults in relation to deficit accumulation. *Journal of the American Geriatrics Society* 2010;58(4):681-87. doi: 10.1111/j.1532-5415.2010.02764.x [published Online First: 2010/03/30]
12. Lee DH, Buth KJ, Martin BJ, et al. Frail patients are at increased risk for mortality and prolonged institutional care after cardiac surgery. *Circulation* 2010;121(8):973-8. doi: 10.1161/circulationaha.108.841437 [published Online First: 2010/02/18]
13. Rockwood K, Song X, MacKnight C, et al. A global clinical measure of fitness and frailty in elderly people. *CMAJ* 2005;173(5):489-95. doi: 10.1503/cmaj.050051 [published Online First: 2005/09/01]
14. Collard RM, Boter H, Schoevers RA, et al. Prevalence of frailty in community-dwelling older persons: a systematic review. *J Am Geriatr Soc* 2012;60(8):1487-92.
15. Fried LP, Tangen CM, Walston J, et al. Frailty in older adults: evidence for a phenotype. *J Gerontol A Biol Sci Med Sci* 2001;56(3):M146-56. [published Online First: 2001/03/17]
16. Searle SD, Mitnitski A, Gahbauer EA, et al. A standard procedure for creating a frailty index. *BMC Geriatr* 2008;8:24. doi: 10.1186/1471-2318-8-24 [published Online First: 2008/10/02]
17. Ensrud KE, Ewing SK, Taylor BC, et al. Comparison of 2 frailty indexes for prediction of falls, disability, fractures, and death in older women. *Arch Intern Med* 2008;168(4):382-9. doi: 10.1001/archinternmed.2007.113 [published Online First: 2008/02/27]
18. Hubbard RE, O'Mahony MS, Woodhouse KW. Characterising frailty in the clinical setting--a comparison of different approaches. *Age Ageing* 2009;38(1):115-9. doi: 10.1093/ageing/afn252 [published Online First: 2008/11/15]

19. Sternberg SA, Wershof Schwartz A, Karunanathan S, et al. The identification of frailty: a systematic literature review. *J Am Geriatr Soc* 2011;59(11):2129-38. doi: 10.1111/j.1532-5415.2011.03597.x [published Online First: 2011/11/19]
20. Rockwood K, Andrew M, Mitnitski A. A comparison of two approaches to measuring frailty in elderly people. *J Gerontol A Biol Sci Med Sci* 2007;62(7):738-43. [published Online First: 2007/07/20]
21. DeCarli C. Mild cognitive impairment: prevalence, prognosis, aetiology, and treatment. *Lancet Neurol* 2003;2(1):15-21.
22. Levy R. Aging-associated cognitive decline. Working Party of the International Psychogeriatric Association in collaboration with the World Health Organization. *Int Psychogeriatr* 1994;6(1):63-8.
23. Petersen RC, Doody R, Kurz A, et al. Current concepts in mild cognitive impairment. *Arch Neurol* 2001;58(12):1985-92.
24. Folstein MF, Folstein SE, McHugh PR. "Mini-mental state". A practical method for grading the cognitive state of patients for the clinician. *J Psychiat Res* 1975;12(3):189-98.
25. Petersen RC, Stevens JC, Ganguli M, et al. Practice parameter: early detection of dementia: mild cognitive impairment (an evidence-based review). Report of the Quality Standards Subcommittee of the American Academy of Neurology. *Neurology* 2001;56(9):1133-42.
26. Petersen RC, Caracciolo B, Brayne C, et al. Mild cognitive impairment: a concept in evolution. *J Intern Med* 2014;275(3):214-28.
27. Ganguli M, Belle S, Ratcliff G, et al. Sensitivity and specificity for dementia of population-based criteria for cognitive impairment: the MoVIES project. *Journal of gerontology* 1993;48(4):M152-61.
28. Weuve J, Kang JH, Manson JE, et al. Physical activity, including walking, and cognitive function in older women. *Jama* 2004;292(12):1454-61.
29. Yaffe K, Krueger K, Sarkar S, et al. Cognitive function in postmenopausal women treated with raloxifene. *N Engl J Med* 2001;344(16):1207-13.
30. Mitchell AJ. A meta-analysis of the accuracy of the mini-mental state examination in the detection of dementia and mild cognitive impairment. *J Psychiat Res* 2009;43(4):411-31.
31. Lytle ME, Vander Bilt J, Pandav RS, et al. Exercise level and cognitive decline: the MoVIES project. *Alzheimer Dis Assoc Disord* 2004;18(2):57-64.
32. Ahmed T, Haboubi N. Assessment and management of nutrition in older people and its importance to health. *Clinical interventions in aging* 2010;5:207-16. [published Online First: 2010/08/17]
33. Shahar D, Shai I, Vardi H, et al. Dietary intake and eating patterns of elderly people in Israel: who is at nutritional risk? *European journal of clinical nutrition* 2003;57(1):18-25. doi: 10.1038/sj.ejcn.1601523 [published Online First: 2003/01/28]
34. Diet, Nutrition, and the Prevention of Chronic Diseases. Geneva, Switzerland: World Health Organization, 1990.
35. Arvaniti F, Panagiotakos DB. Healthy indexes in public health practice and research: a review. *Crit Rev Food Sci Nutr* 2008;48(4):317-27. doi: 10.1080/10408390701326268792117311 [pii] [published Online First: 2008/04/15]
36. Patterson RE, Haines PS, Popkin BM. Diet quality index: capturing a multidimensional behavior. *J Am Diet Assoc* 1994;94(1):57-64. doi: 0002-8223(94)92042-7 [pii] [published Online First: 1994/01/01]
37. Guenther PM, Casavale KO, Reedy J, et al. Update of the Healthy Eating Index: HEI-2010. *J Acad Nutr Diet* 2013;113(4):569-80. doi: 10.1016/j.jand.2012.12.016
38. Deckelbaum RJ, Fisher EA, Winston M, et al. Summary of a scientific conference on preventive nutrition: pediatrics to geriatrics. *Circulation* 1999;100(4):450-6.
39. Bollwein J, Diekmann R, Kaiser MJ, et al. Distribution but not amount of protein intake is associated with frailty: a cross-sectional investigation in the region of Nurnberg. *Nutr J* 2013;12 doi: Artn 10910.1186/1475-2891-12-109
40. Willett WC, Sacks F, Trichopoulos A, et al. Mediterranean Diet Pyramid - a Cultural Model for Healthy Eating. *Am J Clin Nutr* 1995;61(6):1402s-06s.

- 1
- 2
- 3 41. Leon-Munoz LM, Guallar-Castillon P, Lopez-Garcia E, et al. Mediterranean Diet and Risk of Frailty in
- 4 Community-Dwelling Older Adults. *J Am Med Dir Assoc* 2014;15(12):899-903. doi:
- 5 10.1016/j.jamda.2014.06.013
- 6 42. Talegawkar SA, Bandinelli S, Bandeen-Roche K, et al. A Higher Adherence to a Mediterranean-Style Diet Is
- 7 Inversely Associated with the Development of Frailty in Community-Dwelling Elderly Men and
- 8 Women. *J Nutr* 2012;142(12):2161-66. doi: 10.3945/jn.112.165498
- 9 43. Scarmeas N, Stern Y, Mayeux R, et al. Mediterranean diet, Alzheimer disease, and vascular mediation.
- 10 *Arch Neurol* 2006;63(12):1709-17.
- 11 44. Luchsinger JA, Mayeux R. Dietary factors and Alzheimer's disease. *Lancet Neurol* 2004;3(10):579-87.
- 12 45. ICDC. Mabat Zahav National Health and Nutrition Survey age 65 and over 2005-6, 2011.
- 13 46. Zimet GD, Powell SS, Farley GK, et al. Psychometric Characteristics of the Multidimensional Scale of
- 14 Perceived Social Support. *J Pers Assess* 1990;55(3-4):610-17. doi: DOI
- 15 10.1207/s15327752jpa5503&4\_17
- 16 47. Hoyl MT, Alessi CA, Harker JO, et al. Development and testing of a five-item version of the Geriatric
- 17 Depression Scale. *J Am Geriatr Soc* 1999;47(7):873-78.
- 18 48. Ware JE, Kosinski M, Keller SD. A 12-item short-form health survey - Construction of scales and
- 19 preliminary tests of reliability and validity. *Med Care* 1996;34(3):220-33. doi: Doi 10.1097/00005650-
- 20 199603000-00003
- 21 49. Mitnitski AB, Mogilner AJ, Rockwood K. Accumulation of deficits as a proxy measure of aging.
- 22 *ScientificWorldJournal* 2001;1:323-36. doi: 10.1100/tsw.2001.58 [published Online First:
- 23 2003/06/14]
- 24 50. Searle SD, Mitnitski A, Gahbauer EA, et al. A standard procedure for creating a frailty index. *BMC Geriatr*
- 25 2008;8:24.
- 26 51. Health IMo. [Available from:
- 27 [https://www.health.gov.il/UnitsOffice/ICDC/mabat/Pages/Mabat\\_Gold.aspx](https://www.health.gov.il/UnitsOffice/ICDC/mabat/Pages/Mabat_Gold.aspx).
- 28 52. KoBotoobox software [Available from: <http://www.kobotoolbox.org/>.
- 29 53. Tzameret software: Nutrition Department of the Ministry of Health [Available from:
- 30 <https://www.health.gov.il/Subjects/FoodAndNutrition/Nutrition/professionals/Pages/Tzameret.aspx>
- 31 54. Guenther PM, Casavale KO, Reedy J, et al. Update of the Healthy Eating Index: HEI-2010. *Journal of the*
- 32 *Academy of Nutrition and Dietetics* 2013;113(4):569-80. doi: 10.1016/j.jand.2012.12.016 [published
- 33 Online First: 2013/02/19]
- 34 55. Johnson RK, Driscoll P, Goran MI. Comparison of multiple-pass 24-hour recall estimates of energy intake
- 35 with total energy expenditure determined by the doubly labeled water method in young children. *J*
- 36 *Am Diet Assoc* 1996;96(11):1140-4.
- 37 56. Blumberg SJ, Bialostosky K, Hamilton WL, et al. The effectiveness of a short form of the Household Food
- 38 Security Scale. *Am J Public Health* 1999;89(8):1231-4. [published Online First: 1999/08/05]
- 39 57. Bauer JM, Kaiser MJ, Anthony P, et al. The Mini Nutritional Assessment--its history, today's practice, and
- 40 future perspectives. *Nutr Clin Pract* 2008;23(4):388-96. doi: 10.1177/0884533608321132
- 41 23/4/388 [pii] [published Online First: 2008/08/07]
- 42 58. Myers V, Drory Y, Gerber Y, et al. Clinical relevance of frailty trajectory post myocardial infarction. *Eur J*
- 43 *Prev Cardiol* 2014;21(6):758-66.
- 44 59. Washburn RA, Smith KW, Jette AM, et al. The Physical Activity Scale for the Elderly (PASE): development
- 45 and evaluation. *J Clin Epidemiol* 1993;46(2):153-62.
- 46 60. Tombaugh TN, McIntyre NJ. The mini-mental state examination: a comprehensive review. *J Am Geriatr*
- 47 *Soc* 1992;40(9):922-35.
- 48 61. Crum RM, Anthony JC, Bassett SS, et al. Population-based norms for the Mini-Mental State Examination
- 49 by age and educational level. *Jama* 1993;269(18):2386-91.
- 50 62. Vertesi A, Lever JA, Molloy DW, et al. Standardized mini-mental state examination - Use and
- 51 interpretation. *Can Fam Physician* 2001;47:2018-23.
- 52
- 53
- 54
- 55
- 56
- 57
- 58
- 59
- 60

- 1
- 2
- 3 63. Folstein MF, Folstein SE, McHugh PR. "Mini-mental state". A practical method for grading the cognitive  
4 state of patients for the clinician. *J Psychiatr Res* 1975;12(3):189-98. doi: 0022-3956(75)90026-6 [pii]  
5 [published Online First: 1975/11/01]
- 6 64. Katz S, Downs TD, Cash HR, et al. Progress in development of the index of ADL. *Gerontologist*  
7 1970;10(1):20-30. [published Online First: 1970/01/01]
- 8 65. Zimet GD, Dahlem NW, Zimet SG, et al. The Multidimensional Scale of Perceived Social Support. *J Pers*  
9 *Assess* 1988;52(1):30-41. doi: DOI 10.1207/s15327752jpa5201\_2
- 10 66. Tsai AC, Chang T-L, Yang T-W, et al. A modified mini nutritional assessment without BMI predicts  
11 nsutritional status of community-living elderly in Taiwan. *The journal of nutrition, health & aging*  
12 2010;14(3):183-89.
- 13 67. Smith L. New AHA recommendations for blood pressure measurement. *Am Fam Physician*  
14 2005;72(7):1391-+.
- 15 68. Benjamin EJ, Blaha MJ, Chiuve SE, et al. Heart Disease and Stroke Statistics-2017 Update A Report From  
16 the American Heart Association. *Circulation* 2017;135(10):E146-E603. doi:  
17 10.1161/Cir.0000000000000485
- 18 69. Cox DR. Regression Models and Life-Tables. *J R Stat Soc B* 1972;34(2):187-+.
- 19 70. Austin PC. An Introduction to Propensity Score Methods for Reducing the Effects of Confounding in  
20 Observational Studies. *Multivar Behav Res* 2011;46(3):399-424. doi: Pii  
21 93847000010.1080/00273171.2011.568786
- 22 71. Harrell FE, Lee KL, Mark DB. Multivariable prognostic models: Issues in developing models, evaluating  
23 assumptions and adequacy, and measuring and reducing errors. *Stat Med* 1996;15(4):361-87. doi:  
24 Doi 10.1002/(Sici)1097-0258(19960229)15:4<361::Aid-Sim168>3.0.Co;2-4
- 25 72. Keselman HJ, Othman AR, Wilcox RR, et al. The new and improved two-sample t test. *Psychol Sci*  
26 2004;15(1):47-51. doi: DOI 10.1111/j.0963-7214.2004.01501008.x
- 27 73. Nelder JA, Wedderburn RW. Generalized Linear Models. *J R Stat Soc Ser a-G* 1972;135(3):370-+. doi: Doi  
28 10.2307/2344614
- 29 74. Hernan MA, Hernandez-Diaz S, Robins JM. A structural approach to selection bias. *Epidemiology*  
30 2004;15(5):615-25. doi: 10.1097/01.ede.0000135174.63482.43
- 31 75. Robins JM, Hernan MA, Brumback B. Marginal structural models and causal inference in epidemiology.  
32 *Epidemiology* 2000;11(5):550-60. doi: Doi 10.1097/00001648-200009000-00011
- 33 76. Cohen J. Weighted Kappa - Nominal Scale Agreement with Provision for Scaled Disagreement or Partial  
34 Credit. *Psychol Bull* 1968;70(4):213-&. doi: DOI 10.1037/h0026256
- 35 77. Dominguez-Almendros S, Benitez-Parejo N, Gonzalez-Ramirez AR. Logistic Regression Models. *Allergol*  
36 *Immunopath* 2011;39(5):295-305. doi: 10.1016/j.aller.2011.05.002
- 37 78. Rosenbaum PR, Rubin DB. The Central Role of the Propensity Score in Observational Studies for Causal  
38 Effects. *Biometrika* 1983;70(1):41-55. doi: DOI 10.1093/biomet/70.1.41
- 39 79. Rubin DB. Multiple imputation for nonresponse in surveys: John Wiley & Sons 2004.
- 40 80. Collard RM, Boter H, Schoevers RA, et al. Prevalence of frailty in community-dwelling older persons: a  
41 systematic review. *J Am Geriatr Soc* 2012;60(8):1487-92. doi: 10.1111/j.1532-5415.2012.04054.x  
42 [published Online First: 2012/08/14]
- 43 81. Fried LP. Epidemiology of aging. *Epidemiol Rev* 2000;22(1):95-106.
- 44
- 45
- 46
- 47
- 48
- 49
- 50
- 51
- 52
- 53
- 54
- 55
- 56
- 57
- 58
- 59
- 60



## **Footnotes**

### **Authors' contributions**

AG, study coordinator of the ILSA, drafted the manuscript, assisted in the conception of the study and led field activities and study monitoring; UG, co-investigator for the ILSA, conceived of the study concept and design and supervised the study; T Shohat, co-investigator of the ILSA and physician-in-charge of the study; LKB, principal investigator of MABAT ZAHAV survey; T Shimony, coordinator of MABAT ZAHAV survey; YG, principal investigator of the ILSA, conceived of the study concept and design and co-drafted the manuscript. All authors revised, reviewed and approved the final paper.

### **Funding**

This study is supported by grant no.3-12787 from the Chief Scientist Office, Ministry of Health (principal investigator, YG), and The Bircher-Benner Foundation, Tel Aviv University (principal investigator, YG).

### **Competing interests**

The authors declare that they have no competing interests.

### **Acknowledgements**

We are indebted to all those who agree to participate in the study for their cooperation and patience answering our comprehensive questionnaire and their willingness to let us into their homes. We are grateful for our professional and dedicated study team: Osnat Fried, B.Sc, Michal Weber, B.Sc, RD, Rana Younis, B.Sc, RD and Polina Pokrass, B.A, RN.

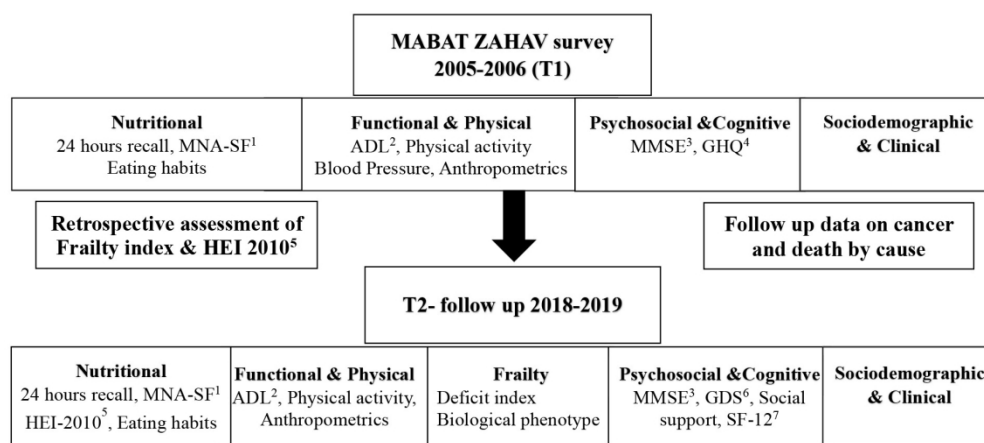

25 Figure 1. Research design sketch. <sup>1</sup>Mini Mental State Examination; <sup>2</sup>General Health Questionnaire;  
26 <sup>3</sup>Activities of Daily Living; <sup>4</sup>Mini Nutritional Assessment- Short Form; <sup>5</sup> Healthy Eating Index; <sup>6</sup>Geriatric  
27 Depression Scale; <sup>7</sup>Short Form of health-related-quality of life.

28  
29 162x91mm (300 x 300 DPI)



1  
2  
3  
4  
5  
6  
7  
8  
9  
10  
11  
12  
13  
14  
15  
16  
17  
18  
19  
20  
21  
22  
23  
24  
25  
26  
27  
28  
29  
30  
31  
32  
33  
34  
35  
36  
37  
38  
39  
40  
41  
42  
43  
44  
45  
46  
47  
48  
49  
50  
51  
52  
53  
54  
55  
56  
57  
58  
59  
60

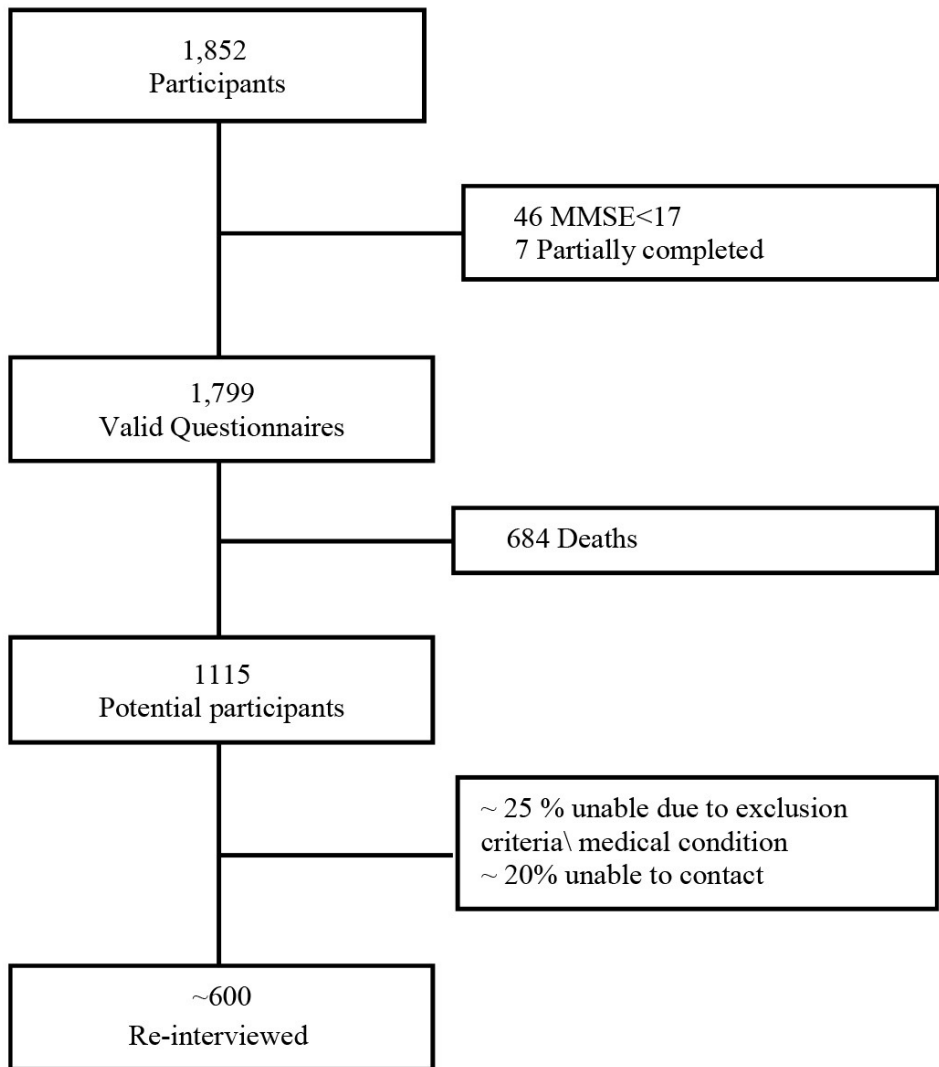

Figure 2. Sample size flow chart.

91x111mm (300 x 300 DPI)

# BMJ Open

## Dietary Patterns in Relation to Healthy Aging. The Israeli Longitudinal Study on Aging (ILSA): Study Protocol.

|                                 |                                                                                                                                                                                                                                                                                                                                                                                                                                                                                                                                                                              |
|---------------------------------|------------------------------------------------------------------------------------------------------------------------------------------------------------------------------------------------------------------------------------------------------------------------------------------------------------------------------------------------------------------------------------------------------------------------------------------------------------------------------------------------------------------------------------------------------------------------------|
| Journal:                        | <i>BMJ Open</i>                                                                                                                                                                                                                                                                                                                                                                                                                                                                                                                                                              |
| Manuscript ID                   | bmjopen-2018-024673.R1                                                                                                                                                                                                                                                                                                                                                                                                                                                                                                                                                       |
| Article Type:                   | Protocol                                                                                                                                                                                                                                                                                                                                                                                                                                                                                                                                                                     |
| Date Submitted by the Author:   | 12-Oct-2018                                                                                                                                                                                                                                                                                                                                                                                                                                                                                                                                                                  |
| Complete List of Authors:       | Goshen, Abigail; Tel Aviv University, Epidemiology and Preventive Medicine<br>Goldbourt, Uri; Tel Aviv University, Epidemiology and Preventive Medicine<br>Shohat, Tamar; Tel Aviv University, Epidemiology and Preventive Medicine; State of Israel Ministry of Health, Israel Center for Disease Control<br>Shimony, Tal ; State of Israel Ministry of Health, Israel Center for Disease Control<br>Keinan-Boker, Lital; State of Israel Ministry of Health, Israel Center for Disease Control<br>Gerber, Yariv; Tel Aviv University, Epidemiology and Preventive Medicine |
| <b>Primary Subject Heading</b>: | Geriatric medicine                                                                                                                                                                                                                                                                                                                                                                                                                                                                                                                                                           |
| Secondary Subject Heading:      | Nutrition and metabolism                                                                                                                                                                                                                                                                                                                                                                                                                                                                                                                                                     |
| Keywords:                       | dietary patterns, elderly, frailty, longitudinal studies, EPIDEMIOLOGY                                                                                                                                                                                                                                                                                                                                                                                                                                                                                                       |
|                                 |                                                                                                                                                                                                                                                                                                                                                                                                                                                                                                                                                                              |

SCHOLARONE™  
Manuscripts

# Dietary Patterns in Relation to Healthy Aging.

## The Israeli Longitudinal Study on Aging (ILSA): Study Protocol.

Abigail Goshen<sup>1</sup>, Uri Goldbourt<sup>1</sup>, Tamar Shohat<sup>1,2</sup>, Tal Shimony<sup>2</sup>, Lital Keinan-Boker<sup>2</sup>, Yariv Gerber<sup>1</sup>

1. Dept. of Epidemiology and Preventive Medicine, School of Public Health, Sackler Faculty of Medicine, Tel Aviv University, Ramat Aviv, Tel Aviv, 6997801, Israel.
2. Israel Center for Disease Control, Israel Ministry of Health, Ramat Gan, Israel.

Abigail Goshen: [abigail1@mail.tau.ac.il](mailto:abigail1@mail.tau.ac.il)

Uri Goldbourt: [goldbu1@post.tau.ac.il](mailto:goldbu1@post.tau.ac.il)

Tamar Shohat: [tamar.shohat2@moh.gov.il](mailto:tamar.shohat2@moh.gov.il)

Tal Shimony: [Tal.Shimony@moh.gov.il](mailto:Tal.Shimony@moh.gov.il)

Lital Keinan-Boker: [Lital.Keinan2@moh.gov.il](mailto:Lital.Keinan2@moh.gov.il)

Yariv Gerber: [yarivgerber@gmail.com](mailto:yarivgerber@gmail.com)

**Corresponding author:** Yariv Gerber, PhD, Department of Epidemiology and Preventive Medicine, School of Public Health, Sackler Faculty of Medicine, Tel Aviv University, Ramat Aviv, Tel Aviv, 6997801, Israel. Email: [yarivgerber@gmail.com](mailto:yarivgerber@gmail.com)

# Dietary Patterns in Relation to Healthy Aging.

## The Israeli Longitudinal Study on Aging (ILSA): Study Protocol.

Introduction: Population aging is accelerating rapidly in Israel as well as worldwide necessitating adaptation of the health care system and consideration of new approaches that serve the specific needs of older adults. In addition to cognitive function, frailty is one of the most challenging expressions of physical and mental aging, a multidimensional syndrome of increased vulnerability. Several studies have shown that low intake of certain micronutrients and protein is associated with higher risk of frailty and cognitive impairment. However, whether global dietary patterns are involved in the etiology of the latter outcomes is unclear.

Methods and analysis: We are conducting, among older adults subjects who took part in "MABAT ZAHAV" (Israeli National Health and Nutrition Survey of Older Adults) in 2005-2006 (T0, N=1,852) an extensive follow-up interview (T1) that includes comprehensive geriatric assessment and evaluation of general health and quality of life. Diet quality is evaluated using the Healthy Eating Index (HEI) 2010, based on 24-hour diet recall measured at T0 and T1. Frailty is assessed using two different approaches: the phenotype framework and the accumulation of deficits model. Cognitive function is assessed by Mini Mental State Examination (MMSE) and cognitive decline by the difference between repeated MMSE measurements. Different analytic methods will be applied to evaluate the role of dietary patterns in development of frailty and cognitive decline with inverse probability weighting used to minimize attrition bias. About 600 subjects are expected to be interviewed by the end of 2019.

Ethics and dissemination: Ethical approval was obtained from the Helsinki Committee of Sheba Medical Center, Tel Hashomer, Israel and the Ethical Committee of Tel-Aviv University. All participants will sign an informed consent form. The findings of the study will be published in peer-reviewed journals.

Keywords: dietary patterns; epidemiology; elderly; frailty; longitudinal studies

## Strengths and limitations of this study

- The study transforms a large national survey of older adults with a broad-spectrum data into a cohort study with a specific age-related questionnaire including comprehensive geriatric assessment.
- Obtaining data at two points in time, more than a decade apart, will allow us to evaluate long-term changes in older adults population and examine adverse clinical outcomes.
- Only few studies have explicitly examined the concept of robust aging among the oldest-old age group.
- Selection bias due to death, loss to follow-up and non-response.
- Misclassification bias due to self-report data and nutritional assessment which is based on a single 24-hour dietary recall.

## Background

### Healthy aging

Population aging is accelerating rapidly in Israel as well as worldwide, necessitating adaptation of the health care system and consideration of new approaches that serve the specific needs of older adults <sup>1</sup>. According to current forecasts, the percentage of persons 65 years and older will increase from 8.5% in 2015 to 19.0% by 2030 <sup>2</sup>. The concept of healthy aging is generally described as optimizing opportunities for improving and preserving health and physical, social, and mental wellness; and enhancing successful life-course transitions <sup>3</sup>. While this definition depicts healthy aging or successful aging as a complex process of adaptation to changes across the lifespan, the concept needs to be looked at in terms of a measurable outcome that can be empirically validated <sup>4</sup>. Despite the differences in healthy aging definitions, there is some consensus in the studies that 'successful ager' outcome should measure function in domains of cognitive, physical and mental well-being <sup>4</sup>. In our study, we intended to evaluate healthy aging using assessment of cognitive function and frailty, as described in the following sections.

## Frailty

Frailty is internationally recognized as an important medical syndrome of decreased reserve and resistance to stressors, resulting from cumulative declines across multiple physiologic systems<sup>5</sup>. Frail older persons are at high risk of accelerated physical and cognitive functional decline, disability, and death<sup>6</sup>. The concept of frailty adopts an integrative approach which represents general properties of aging and health rather than particular functional deficiency or decline<sup>7</sup>. Assessment of frailty has implications both for the individual and on society at large, forecasting healthcare use<sup>8,9</sup> and providing opportunities for preventive intervention<sup>10,11</sup>, thus making it a key issue in chronic disease management and healthy aging<sup>12,13</sup>. Based on 21 cohorts involving 61,500 participants, on average, 11% of community-dwelling subjects aged 65 years and older are defined as frail and another 42% as prefrail<sup>14</sup>. Nevertheless, the reported prevalence differed substantially, ranging from 4% to 59% due to different definitions and measurements of frailty status. Methods to measure frailty vary widely throughout the literature<sup>15-18</sup>, with two principal models of frailty emerging: **(1)** The Fried and colleagues' *Biological Phenotype*<sup>5</sup> framework, which conceptualizes frailty as a biologic syndrome characterized by a decline in overall function and loss of resistance to stressors. This model is comprised of five physical indicators including low physical activity, weak grip strength, slow walking speed, exhaustion, and unintentional weight loss. **(2)** The Rockwood and colleagues' *Accumulation of Deficits* Index<sup>19</sup>, which defines frailty as the cumulative effect of individual deficits. Under this model, frailty is measured by ~40 parameters of symptoms, signs, disease states and disabilities, collectively referred to as deficits. The index is a calculation of the presence or absence of each deficit as a proportion of total<sup>8</sup>.

## Cognitive function

The field of aging and dementia is focusing on the characterization of the earliest stages of cognitive impairment. Mild cognitive impairment (MCI) is a recently described syndrome that is currently thought of as a transition phase between healthy cognitive aging and dementia<sup>20</sup>. MCI is defined as cognitive decline greater than expected for an individual's age and education level but that does not interfere notably with activities of daily life<sup>21</sup>. The estimated prevalence of MCI in population-based studies ranges from 10% to 20% in people older than 65 years of age. Prevalence rates mostly vary as a result of different diagnostic criteria as well as different sampling and assessment procedures<sup>22</sup>. Clinical studies indicate that older adults with MCI will progress to Alzheimer's Disease (AD) at a rate of 10% to 15% per year, compared with healthy control subjects who convert at a rate of 1% to 2% per year<sup>23</sup>, making it

1  
2  
3 an area of intense interest for theoretical and practical reasons. A widely recognized instrument for  
4 detection of cognitive impairment is the Mini-Mental State Examination (MMSE)<sup>24 25</sup>. The MMSE  
5 consists of thirty questions and has a maximum score of 30 points. MCI will be assessed according to  
6 poor performance on MMSE (i.e., a score of 1.5 standard deviations below the age- and education-  
7 specific mean). In addition, the key criteria that distinguish MCI from dementia are preservation of  
8 independence in functional abilities and lack of significant impairment in social or occupational  
9 functioning<sup>25 26</sup>. Cognitive decline definition among prospective studies vary<sup>27</sup> with a more commonly  
10 used method which define cognitive decline as the 10% of the sample who declined the most (i.e., the  
11 90<sup>th</sup> percentile of decline). Such a population-based cutoff point has showed to be sensitive and specific  
12 indicator of cognitive decline<sup>28</sup> and has been used in different studies<sup>29-32</sup>.

## 21 Nutrition

Nutrition is

23 an important element of health in the older population that affects and is affected by the aging process<sup>33</sup>  
24 <sup>34</sup>. Malnutrition is highly prevalent among older adults and associated with a general decline in physical  
25 and mental functioning, higher hospitalization rate and increased mortality<sup>33</sup>. Eating patterns of various  
26 cultures around the world have been associated with risk for chronic diseases<sup>35</sup>. Accordingly, several  
27 countries have issued dietary recommendations aimed at chronic disease prevention<sup>36</sup>. However, little is  
28 known about the interactive effects of dietary behavior and diet quality on overall risk, as food and  
29 nutrients are not eaten in isolation. Consequently, indices of dietary quality, patterns, and variety are  
30 increasingly used by nutritional epidemiologists<sup>37</sup>. The Healthy Eating Index-2010 (HEI-2010)<sup>38</sup> is such  
31 an index, originally released in 1995 and then updated in 2010 by the US Department of Agriculture  
32 (USDA) as a measure of diet quality. The concept of nutritional deficiency as a determinant of frailty  
33 development is not new but whether it is a predictor or consequence of frailty has not been investigated  
34 adequately<sup>39</sup>. Several studies have shown that low intake of certain micronutrients and protein is  
35 associated with a higher risk of developing frailty. However, very few studies have assessed the effect of  
36 overall dietary patterns on frailty<sup>40</sup>. Two studies have suggested that increasing adherence to  
37 Mediterranean diet (MD, a diet characterized by high intake of fish, vegetables, legumes, fruits, cereals,  
38 and unsaturated fatty acids<sup>41</sup>) is associated with decreasing risk of frailty among community-dwelling  
39 older adults in Spain and Italy<sup>42 43</sup>. In addition, it was recently demonstrated that higher adherence to  
40 MD is associated with lower AD risk<sup>44 45</sup>. However, in most studies the MD score was defined from  
41 sample-specific scores; thus, only the relative but not the absolute effect of MD was assessed, and the  
42 results of these studies are difficult to compare across populations.

## **Research Objective**

### **General objective**

Investigate the relationship between dietary patterns and healthy aging as measured by cognitive function and frailty

### **Specific aims**

- A. Develop a frailty index based on "Mabat Zahav" data (T0) and evaluate its prevalence and association with cause-specific mortality categories.
- B. Assess development of frailty among study participants and examine its determinants, particularly dietary patterns.
- C. Assess development of cognitive decline among current study participants and examine its determinants, particularly dietary patterns.
- D. Investigate general long-term changes of dietary patterns, consumption and nutritional status among study participants.

### **Research hypothesis**

We hypothesize that diet quality in older adults is predictive of general well-being and a variety of clinical outcomes including frailty state and cognitive changes.

## **Methods/Design**

### **Research design**

The study employs a cohort study design. It constitutes the second interview (T1) of Mabat Zahav study<sup>46</sup>. The First National Health and Nutrition Survey of Older Adults Aged 65 and Over in Israel ("Mabat Zahav") was carried out in 2005-2006 by the Israel Center for Disease Control (ICDC) and the Nutrition Department of the Israel Ministry of Health. The data collected on the survey included information regarding health and nutrition status, health behaviors (physical activity, alcohol consumption, medication use, use of nutrition supplements), knowledge and attitudes regarding nutrition, and utilization of health services. The survey framework and population is further described in the following



1  
2  
3 section. The current study questionnaire (T1) duplicates most parts of the original (T0) interview (Fig.  
4 1). In addition, measurements pertaining to frailty status and cognitive function are performed, as well as  
5 psychosocial assessments including the multidimensional scale of perceived social support (MSPSS)<sup>47</sup>,  
6 geriatric depression scale (GDS)<sup>48</sup> and the short form of health-related-quality of life (SF-12)<sup>49</sup>. The  
7 added psychosocial questionnaires are in order to enable a more comprehensive analysis of the concept  
8 of healthy aging and well-being. The HEI-2010, a measure of diet quality retrospectively assessed at T0,  
9 will serve as the exposure variable and be assessed prospectively at T1 in order to evaluate general  
10 changes in diet quality and composition. Frailty at T0 is retrospectively assessed through the Rockwood  
11 and colleagues' Deficit Index<sup>19 50</sup>. The index will be developed according to published criteria<sup>6</sup> in order  
12 to identify frail participants at study entry. Frailty will be assessed prospectively at T1 by both the  
13 Deficit Index and the Fried and colleagues' Biological Phenotype framework<sup>5</sup>. Cognitive changes and  
14 MCI will be assessed prospectively. Follow-up of mortality, overall and across specific categories, will  
15 be conducted among T0 participants through linkage to the nationwide database of causes of death  
16 (compiled by the Central Bureau of Statistics) via their national identification numbers.  
17  
18  
19  
20  
21  
22  
23  
24  
25  
26  
27

### 28 **"Mabat Zahav" survey – study population**

29  
30 The Mabat Zahav survey population was a random sample of Israeli citizens age  $\geq 65$  years old. The  
31 survey included 1,852 community-dwelling participants (1,536 Jews and 316 Arabs) residing in Israel,  
32 who had lived in the country for at least one year in urban and rural settlements with more than 20,000  
33 residents. Exclusion criteria included: significant cognitive reduction-MMSE $<17$ , current hospitalization  
34 for more than six months, hospitalization in a psychiatric institution, and hospitalization in a long-term-  
35 care institution. Survey methods included a personal interview in the interviewees' homes or sheltered  
36 accommodation using a structured questionnaire. The sampling framework was provided by the two  
37 major health funds in Israel; Clalit Health Services, and Maccabi Health Services, which represent  
38 86.3% of all older adults citizens in Israel. Lists of members from each of the two health funds were  
39 divided into population groups (Jews and Arabs) according to name and identity number. Sampling was  
40 carried out in two stages. First stage: 5,100 people were randomly sampled, with 4,250 from the Jewish  
41 list, and 850 from the Arab list. Interviewing of individuals from the first sample begun in July 2005.  
42 Second stage: An additional sample was drawn in January 2006, of 4,250 Jews and 2,500 Arabs, since  
43 all lists with names selected in the first sample had been exhausted at that stage by interviewers working  
44 in the selected areas. The overall response rate among successful contacts, for both stages, was 29.1% in  
45 the Jewish sector and 35.4% in the Arab sector. Oversampling was carried out in the Arab population,  
46  
47  
48  
49  
50  
51  
52  
53  
54  
55  
56  
57  
58  
59  
60

1  
2  
3 because of the small percentage of elderly in the Arab population (6.3%), in order to ensure a sample  
4 large enough to carry out statistical analyses and comparisons with the Jewish sector.

5  
6 The interviews were held in multiple languages, and the questionnaires were translated accordingly:  
7  
8 1277 (69%) interviews took place in Hebrew, 316 (17%) in Arabic, 257 (14%) in Russian and 2 in  
9  
10 English. The data collected on the survey included information regarding health and nutrition status,  
11  
12 health behaviors (physical activity, alcohol consumption, medication use, use of nutrition supplements),  
13  
14 knowledge and attitudes regarding nutrition, and utilization of health services among this population <sup>46</sup>.  
15  
16 All data collected from 1,799 subjects are available online at the ministry of health government web site  
17  
18 <sup>51</sup>.

### 19 20 21 **Exclusion criterion in current research stage (T1):**

22 Significant cognitive reduction as measured by a MMSE score of less than 17 <sup>24 52</sup> or inability to  
23  
24 communicate.

### 25 26 **Sample size**

27  
28 Among T0 initial participants (1,852), 1,799 (1,499 Jews and 300 Arabs) questionnaires were included  
29  
30 in the final survey analysis. Forty-six participants (29 Jews and 17 Arabs) had a MMSE score of less  
31  
32 than 17 (after adjustment for age and education), and seven questionnaires were only partially completed  
33  
34 and therefore excluded from the statistical analysis. According to the mortality registry of the Ministry  
35  
36 of Health, 1,115 participants were alive in February 2017. We assume that 25% of candidates will be  
37  
38 unable to participate due to either exclusion criteria or severe medical condition and another 20% could  
39  
40 not be contacted due to address or telephone number changes. We expect a response rate of 55%-60%  
41  
42 among the remaining candidates for T1 interview, and so about 600 subjects are expected to be re-  
43  
44 interviewed (Fig.2). Our efforts to maximize recruitment include the following steps:

45  
46 Disconnected phone numbers and no response: **a.** Locating address changes via the Ministry of Interior  
47  
48 database. **b.** Searching by the Israeli non-commercial telephone directory according to city of residence  
49  
50 and family name only (in case of incorrect street name). **c.** Conducting ten attempts to contact each non-  
51  
52 response.

53  
54 Refusal: We are trying to encourage cooperation by **a.** Offering to conduct interviews 7 days a week,  
55  
56 morning times and afternoons. **b.** Offering to divide the interview into two separate times, in case the  
57  
58 length of the interview is a concern for the participant. **c.** Request to try re-appeal in a few weeks or  
59  
60 month.

## Data collection

A

personal interview is conducted in the interviewees' homes by trained interviewers using a structured questionnaire. Anthropometric measurements are performed using standardized protocols. Interviews are conducted in Hebrew, Arabic or Russian. Estimated time of an interview is an hour and a half. In case the participant is unable to complete the questionnaire by himself/herself, but still meets inclusion criteria, information from a proxy is obtained regarding dietary intake, chronic diseases and co-morbidities, activities of daily living (ADL), sociodemographic status and medication use. The proxy interview does not include the following assessments: GDS, SF-12, MSPSS and self-rated health. All data (except the 24-hour dietary recall) are collected using KoBotoolbox<sup>53</sup> software which is a freely available application to design surveys for data collection through smart devices and run on Android based platforms. The data are exported into a password protected Excel file on a daily basis. All responses are typed directly during the interview through Lenovo TAB2 A10-30 tablet. The 24-hour dietary recall is handwritten before being typed to "Tzamert" program<sup>54</sup>, an Israeli nutrient data program, which enables recording of food intake and calculation of nutrient intake. In case of any technical difficulties, the questionnaire is completed manually by the interviewer. A pilot study (n=30) was conducted, after which questionnaires, research tools, and protocol were finalized.

Exposure variable: The HEI-2010 score at baseline (T0): Dietary data from the 24-hour dietary recall questionnaire was entered into the "Tzamert" program. The program uses the nutrient data in the BINAT program- the Israeli nutrient database which is maintained and updated by the Nutrition Department of the Ministry of Health. An HEI-2010 score<sup>37 55</sup> will be calculated for T0 and T1 interviews separately. The HEI-2010 has twelve components, nine of which assess adequacy of the diet, including 1) total fruit; 2) whole fruit; 3) total vegetables; 4) greens and beans; 5) whole grains; 6) dairy; 7) total protein foods; 8) seafood and plant proteins; and 9) fatty acids. The remaining three: refined grains, sodium, and empty calories assess dietary components that should be consumed in moderation. For each component, the respondents receive a minimum score of 0 and a maximum score of 5 or 10 (for perfect adherence to recommendations); intermediate degrees of adherence are calculated proportionately. Thus, the overall index has a range from 0 (worst) to 100<sup>37 55</sup>.

Nutritional status assessments:

- 1  
2  
3 (1) Dietary recall: The multiple-pass 24-hour dietary recall questionnaire is administrated. The method  
4 was originally developed by the USDA in order to limit the extent of underreporting that occurs with  
5 self-reported food intake <sup>56</sup>. The interviewer uses three distinct passes to gather information about a  
6 subject's food intake during the preceding 24 hours. The first pass is termed the *quick list*; here the  
7 interviewees are asked to recall all they had eaten and drunk in the 24-hour period that preceded the  
8 interview. The second pass is termed the *detailed description*. In this pass, the interviewees are asked  
9 to clarify any foods mentioned in the quick list. The third pass is termed the *review*. The interviewer  
10 reviews the list of foods mentioned and probes for additional eating occasions and clarifies food  
11 portion sizes <sup>56</sup>. In order to assist the interviewees in identifying food types and quantities during the  
12 interview, the interviewers use the "Food and Food Quantities Guide" which is partially based on the  
13 Food Guide of the USDA. The guide includes detailed questions on foods, as well as many  
14 photographs of Israeli foods. In order to facilitate quantification of amounts consumed, the  
15 interviewers use, in addition to the guide, identification aids such as a measuring cup, tablespoon,  
16 and teaspoon.
- 17  
18 (2) Food security: Household food security is defined as a situation whereby all household members  
19 have access at all times to a food supply which is adequate for a healthy active life. Food security is  
20 assessed using the short 6-item food security USDA questionnaire <sup>57</sup>.
- 21  
22 (3) Malnutrition risk: Modified Mini Nutritional Assessment-Short Form (MNA-SF) <sup>58</sup>. The 6-item  
23 questionnaire is a nutritional screening tool that assesses malnutrition risk.
- 24  
25  
26  
27  
28  
29  
30  
31  
32  
33  
34  
35  
36  
37

### Outcome variables:

38  
39 Frailty assessment: Frailty at T0 and T1 is assessed by the *Deficit Index* model <sup>19 50</sup>. Under this model,  
40 frailty is measured by ~40 parameters of symptoms, signs, disease states and disabilities, collectively  
41 referred to as deficits. Adapting the Rockwood index of accumulation of deficits method <sup>7</sup> with T0 data,  
42 a Frailty Index (FI) was developed comprising 33 variables. The FI at T1 will comprise the same  
43 variables as T0 FI and will serve as the outcome measure. The FI is a calculation of the presence or  
44 absence of each deficit as a proportion of the total. Dichotomous items are coded as 0 if the deficit is  
45 absent and as 1 if it is present, while ordinal variables are graded into a score between 0 and 1 (0  
46 representing no impairment, 0.5 for minor impairment, and 1 for major impairment). Scores are then  
47 summed up and divided by the total number of variables, yielding a frailty index between 0 and 1, with  
48 1 representing the greatest frailty (a threshold of  $\geq 0.25$  is typically used to define frailty) <sup>59</sup>. Frailty at T1  
49  
50  
51  
52  
53  
54  
55  
56  
57  
58  
59  
60

1  
2  
3 is additionally assessed by the *Biological Phenotype* model<sup>60</sup>. Frailty using this instrument is identified  
4 by the presence of three or more of the following components: 1. Shrinking: weight loss, unintentional,  
5 of more than 4.5 Kg, or more than 5% of body weight, in the previous year; 2. Weakness: grip strength  
6 in the lowest 20% (adjusted for sex and body mass index); 3. Poor endurance and energy: as indicated  
7 by self-report of exhaustion; 4. Slowness: the slowest 20% of the participants in the sample, based on  
8 time of a 5-meter walk (adjusted for sex and standing height); 5. Low physical activity level: a weighted  
9 score of kilocalories expended per week will be calculated based on a Physical Activity Scale for the  
10 Elderly (PASE) questionnaire<sup>61</sup>. The lowest quintile of physical activity will be identified for each  
11 gender.  
12  
13  
14  
15  
16  
17  
18  
19

20 Cognitive assessment: Cognitive status is evaluated using the MMSE<sup>24</sup> the maximum score is 30. The  
21 questions typically have been grouped into seven categories, each representing a different cognitive  
22 domain or function: orientation to time (5 points); orientation to place (5 points); registration of three  
23 words (3 points); attention and calculation (5 points); recall of three words (3 points); language (8  
24 points) and visual construction (1 point)<sup>62</sup>. The MMSE scores will be education- and age-standardized  
25  
26  
27  
28  
29  
30  
31  
32  
33  
34  
35  
36  
37  
38  
39  
40  
41  
42  
43  
44  
45  
46  
47  
48  
49  
50  
51  
52  
53  
54  
55  
56  
57  
58  
59  
60  
Cognitive assessment: Cognitive status is evaluated using the MMSE<sup>24</sup> the maximum score is 30. The  
questions typically have been grouped into seven categories, each representing a different cognitive  
domain or function: orientation to time (5 points); orientation to place (5 points); registration of three  
words (3 points); attention and calculation (5 points); recall of three words (3 points); language (8  
points) and visual construction (1 point)<sup>62</sup>. The MMSE scores will be education- and age-standardized  
<sup>63</sup>. Some participants cannot complete test items due to physical disability. Items that the participant  
cannot complete will not be included in the total score. The MMSE will be scored out of the items that  
can be tested<sup>64</sup>. Cognitive impairment will be defined as a score < 24<sup>24</sup>. Cognitive decline will be  
calculated as the MMSE score difference between 2005 and 2017 and will be defined by the 10% of the  
sample who declined the most (i.e., the 90<sup>th</sup> percentile of decline) MCI will be assessed according to  
poor performance on MMSE (i.e., scored 1.5 standard deviations below the age- and education-specific  
mean) and preserved functional independence according to Katz et al. scale of activities of daily  
living (ADL) score<sup>25 26</sup>. Both cognitive decline and MCI will serve as outcome measurements and  
separately be investigated in relation to dietary quality.

#### Other covariates:

47 Health status evaluation: The questionnaire includes data on self-rated health (current status and recent  
48 trajectories), chronic diseases and co-morbidities (e.g., cardiovascular diseases, Parkinson's disease,  
49 respiratory diseases, renal disease, cancer, glaucoma and cataract, diabetes mellitus, osteoporosis,  
50 hypertension). In addition, the questionnaire includes demographic details, alcohol consumption, and  
51 smoking habits information.  
52  
53  
54  
55  
56  
57  
58  
59  
60

1  
2  
3 Assessment of disabilities: Function is assessed by the Katz scale of Activities of Daily Living<sup>65</sup> based  
4 on ability to dress, shower/bathe, sit down and rise from a chair, eat and go to the bathroom. The  
5 maximum score is 15, with a score of 5 indicating "no functional limitations," a score of 6-10 indicating  
6 some functional limitations, and a score of 11 or more indicating several functional limitations.  
7  
8  
9

10  
11  
12 Psychosocial assessments: Assessments include depression, perceived social support and health-related  
13 quality of life (SF-12). Depression is evaluated via a 5-item short form of the Yesavage geriatric  
14 depression scale (GDS)<sup>48</sup>. A score of 2 or higher indicates possible depression. Social support is  
15 assessed through the Multidimensional Scale of Perceived Social Support (MSPSS)<sup>66</sup>, a 12-item  
16 questionnaire designed to measure perceptions of support from three sources: family, friends and a  
17 significant other (4 items for each source). Answers are given on a 1-7 scale. Weighted scores are  
18 calculated by averaging the specific items, each scale (source) individually and the entire questionnaire.  
19 A high score represents a high level of perceived social support. Health-related quality of life is  
20 evaluated via a short form of a multidimensional measure of health-related quality of life SF-12<sup>49</sup>,  
21 physical (PCS) and mental (MCS) component scores will be constructed from SF-12, using standard  
22 (U.S.) and country-specific scoring algorithms.  
23  
24  
25  
26  
27  
28  
29  
30  
31

32 Drugs: The participants are asked about any medication use on a regular basis (prescription as well as  
33 over-the-counter drugs). In the preliminary letter, the participants are asked to prepare their regular  
34 medication list. Medications are coded using the ATC (Anatomical Therapeutic and Chemical) system,  
35 developed by the World Health Organization (WHO)<sup>46</sup>.  
36  
37  
38  
39  
40

41 Anthropometric measurements: Include standing height and weight, ulna length (to calculate height,  
42 using recognized formulae), waist and mid-upper arm circumference. Weight measurements are carried  
43 out using an analog scale suitable for weighing up to 130 kg, with accuracy to 0.5 kg. The scales are  
44 placed on an uncarpeted floor and calibrated before weighing. Height is measured using a spring coil  
45 measuring tape. Waist circumference is measured using a flexible tape, with the ability to measure up to  
46 150 cm, at the narrowest part of the torso, where a "fold" is created when bending sideways<sup>46</sup>. Mid-  
47 upper arm circumference is measured at the mid-point between the tip of the shoulder and the tip of the  
48 elbow (olecranon process and the acromion) using a flexible tape<sup>67</sup>.  
49  
50  
51  
52  
53  
54  
55  
56  
57  
58  
59  
60



1  
2  
3 Blood pressure and pulse measurements: The interviewers are conducting blood pressure and pulse  
4 measurements using an electronic monitor. The measurements are carried out according to a protocol  
5 based on recommendations of the American Heart Association <sup>68</sup>. Sitting blood pressure and pulse are  
6 measured in the right arm and is carried out twice, with a minute rest in-between. In case of a difference  
7 of 10% or more between measurements of either systolic or diastolic pressure, a third measurement is  
8 carried out. The final value will be the mean of measurements.  
9  
10  
11  
12  
13

14  
15 Mortality and cause of death: Original participants were linked to the nationwide database of causes of  
16 death (compiled by the Central Bureau of Statistics) via their national identification numbers. Mortality  
17 information is managed by the Ministry of Health. Since 1999, deaths are coded according to the  
18 International Classification of Diseases, Tenth Edition (ICD-10). Cause-specific mortality categories  
19 were divided into cardiovascular disease (CVD) deaths and non-CVD deaths. According to the  
20 classification used by the American Heart Association <sup>69</sup>, CVD deaths are divided into three categories:  
21 coronary heart disease (CHD), diseases of the heart and diseases of the circulatory system (ICD-10: I00-  
22 I99).  
23  
24  
25  
26  
27  
28  
29  
30  
31

### 32 **Quality assurance**

33  
34 Quality assurance is carried out in various ways: (1) A pilot study (n=30) was conducted, after which  
35 questionnaires and research tools were finalized; (2) Interviewer training: A 2-day seminar were  
36 designed and included standard procedures of administrating research questionnaires, performing  
37 anthropometric measurements and handling data in general; (3) All interviews (under interviewee  
38 consent) are recorded; (4) The study coordinator randomly monitor 5-10% of all interviews; (5) Interim  
39 data analysis will include division per each interviewer in order to assess potential bias; (6) Dietary data  
40 quality assurance includes: *a.* a food recall check: time sequence, completeness of information, matching  
41 of the items in the "Quick List" with those in the "Comprehensive List", and *b.* following data entry into  
42 the Tzamert program, testing will be performed for outliers, in appropriate quantities, lack of correlation  
43 between meal times and types, and missing quantities and incorrect coding.  
44  
45  
46  
47  
48  
49  
50  
51  
52  
53

### 54 **Statistical analysis according to specific aims**

Analyses will be performed using SAS version 9.4 (SAS Institute Inc, Cary, NC), IBM SPSS version 25 (SPSS, Chicago, IL) and R version 3.2.3 (R Development Core Team).

**A.** Frailty categories assessed at baseline (T0; frail vs. robust) will serve as the exposure variable.

Baseline characteristics across frailty index categories will be compared by chi-squared test for categorical variables and student-t-test for continuous variables. Cox proportional hazards regression models <sup>70</sup> will be fitted to evaluate the hazard ratios for death and other time-to-event outcomes associated with baseline exposure groups. Several adjustment methods will be applied including traditional multivariable adjustment and propensity score adjustment <sup>71</sup>. The incremental discriminatory ability of frailty index over demographic and SES variables in predicting death during a 12-year follow up will be evaluated by the c-statistic. Assessing the c-statistic and its corresponding standard error from Cox proportional hazards models will be performed with methods proposed by Harrell et al. <sup>72</sup>.

**B.** Frailty among current study participants (T1) will be assessed by two methods, and Weighted Kappa will be used to assess the agreement in the results of the two methods that measure frailty <sup>73</sup>.

Baseline characteristics across HEI categories as measured at T0 will be compared by chi-squared test for categorical variables and analysis of variance for continuous variables. The predictive role of nutritional indices in the long-term incidence of frailty will be assessed using multivariable logistic regressions models <sup>74</sup>. Frailty status, assessed at follow-up (T1), will be treated as a dichotomous outcome (frail vs. robust). Adjustment will be made for sociodemographic, clinical, and psychosocial variables, via either multivariable adjustment or propensity score <sup>75</sup>. We will exclude participants who were frail at baseline. Of the 1,799 participants in the original survey, many are no longer able to participate in T1 interview (death, loss to follow-up, non-response). Because frailty status could not be assessed among the latter group, selection bias is introduced <sup>76</sup>. This bias will be addressed through an adaptation of a marginal structural model, applying inverse probability weights <sup>76 77</sup>. Accordingly, the probability of original participants to take part in the second interview will be estimated. Each observation will then be weighted by the reciprocal (i.e., the inverse) of the predicted probability of participating at T1.

**C.** In order to investigate dietary patterns and their potential role in longitudinal cognitive changes, we will consider several methods for defining cognitive decline as they vary considerably <sup>27</sup> and compare results using different definitions. We will exclude participants with cognitive impairment at baseline (MMSE score < 24). The predictive role of nutritional indices in cognitive changes will



1  
2  
3 be assessed using generalized linear model <sup>78</sup> or logistic regression models <sup>74</sup> depending on the  
4 cognitive decline definition method used. Several adjustment methods will be applied including  
5 multivariable adjustment or propensity score <sup>75</sup>. Selection bias will be addressed through an  
6 adaptation of a marginal structural model, applying inverse probability weights <sup>76 77</sup> as described  
7 above.  
8  
9  
10

11 **D.** Descriptive statistics of dietary consumption and nutritional status among current study participants  
12 (T1) will include assessing adequate macro and micronutrients consumption on the basis of Dietary  
13 Reference Intake (DRI) <sup>79 80</sup> and the prevalence of malnutrition risk. Results will be expressed as  
14 means and standard deviation (SD) or percentages as appropriate. In order to investigate different  
15 characteristics of longitudinal changes in diet quality among participants with two dietary recall  
16 assessments, we will calculate the difference between HEI scores for each participant and divide  
17 them into different categories from the largest decrease to the largest increase. Initial lifestyle  
18 characteristics and changes in these characteristics according to the category of change in the HEI  
19 score will be calculated.  
20  
21  
22  
23  
24  
25  
26  
27  
28  
29

### 30 **Approach to missing data**

31 Missing values for the variables comprising the frailty index will be imputed using multiple imputation  
32 methodology <sup>81</sup>. The number of complete (imputed) datasets will be defined by the following formula:  
33  $(1+\lambda/m)^{-1}$  = efficiency, where  $\lambda$  is the fraction of missing information and  $m$  the number of datasets to  
34 impute. We will assume an efficiency of 0.975. Missing values will be replaced by imputed values based  
35 on models incorporating demographic, socioeconomic, psychosocial, and clinical variables. The results  
36 of these datasets will then be combined using Rubin's rules <sup>81</sup>.  
37  
38  
39  
40  
41  
42  
43

### 44 **Estimated statistical power**

45 Among 1,800 initial participants, some 1,115 survived so far. About 600 subjects are expected to be re-  
46 interviewed, assuming a response rate of 55% for T1 interview. Considering frailty prevalence of over  
47 35% at the estimated average age of 84 years in T1 interview<sup>82</sup>, about 250 frail subjects can be expected.  
48 This sample size is sufficient for detecting an adjusted odds ratio for frailty of  $\leq 0.60$  between the upper  
49 vs. lower HEI score tertiles (significance level at 5% and power of 80%). A previous study showed after  
50 a 6-year follow-up that higher adherence to MD diet was associated with lower odds of developing  
51 frailty [OR = 0.30 (95% CI: 0.14, 0.66)] <sup>43</sup>.  
52  
53  
54  
55  
56  
57  
58  
59  
60

## **Patient and Public Involvement**

Patients and or public were not involved.

## **Ethical aspect**

Ethical approval for the study was obtained from the Helsinki Committee of Chaim Sheba Medical Center at Tel Hashomer and the Ethical Committee of Tel-Aviv University. Potential participants receive a preliminary letter with a description of the study, a request to participate and an announcement that telephone contact would be made in the near future. In addition, the letter provides the telephone number of the research coordinator for further questions. After a minimum of two weeks, potential participants are contacted by telephone in order to set an interview appointment for those who agree to participate. The interview does not involve clinical procedures, and no human biological specimens are collected. Therefore, participants' burden is minimal. Each interviewee is asked to sign an informed consent form.

## **Dissemination**

The findings of the study will be published in peer-reviewed journals and will be presented at national and international conferences.

## **Discussion**

The ILSA sets out to transform a large national survey of older adults with a broad-spectrum data into a cohort study with a specific age-related questionnaire including comprehensive geriatric assessment, evaluation of general health and quality of life. Obtaining data at two points in time, more than a decade apart, will allow us to evaluate long-term changes in older adults population and examine dietary role in the context of healthy aging and adverse clinical outcomes. Participants' estimated current mean age of 84 years old, defined as the "oldest-old" have over past decades been the most rapidly expanding segment of the population in developed countries and also the most susceptible to disease and disability<sup>83</sup>. Only few studies have explicitly examined the concept of robust aging among the oldest-old and investigated its heterogeneity in functioning, cognitive abilities, diet quality, and nutritional status changes. Both frailty and cognitive decline are at the core definition of healthy aging and are highly prevalent in older people; still, as their status varies considerably among older adults, important issues

1  
2  
3 such as how they develop, are they preventable, and can they be detected reliably have yet to be defined.  
4  
5 Our study design has several limitations. Of the 1,799 participants in the original survey, many are no  
6  
7 longer able to participate in T1 interview (death, loss to follow-up, non-response). Because frailty status  
8  
9 and cognitive state could not be assessed among the latter group, selection bias is introduced. This bias  
10  
11 will be addressed through applying inverse probability weights based on estimated propensity score.  
12  
13 Another limitation is the fact that dietary quality assessment (exposure variable) is based on a single 24-  
14  
15 hour dietary recall; although evaluation of the HEI score is suitable for a single 24-hour dietary recall  
16  
17 intake<sup>84 85</sup>, individual diets can vary greatly from day to day. Furthermore, we cannot preclude that  
18  
19 participants may have changed their dietary habits during the follow-up. The 24-hour dietary recall tool  
20  
21 is widely used to assess dietary intake in population studies since 1965<sup>86</sup>, with studies indicating its  
22  
23 accuracy for estimating energy intake<sup>56 87</sup>. In addition, the multiple-pass 24-hour dietary recall  
24  
25 technique, which is used in our study, manage to limit the extent of underreporting that occurs with single  
26  
27 self-reported food intake<sup>56 88</sup>. Like most similar studies, self-report information and information from a  
28  
29 proxy can lead to misclassification bias that may lead to under or overestimation of dietary recall, frailty  
30  
31 and other outcomes. Nevertheless, examining the role of nutritional dietary pattern in the context of  
32  
33 healthy aging and adverse clinical outcomes may help to broaden our knowledge regarding the older  
34  
35 adults population, provide a scientific basis on which policymakers can rely and pave the way for early  
36  
37 therapeutic interventions.  
38  
39  
40  
41  
42  
43  
44

## 45 **Reference:**

- 46  
47 1. Keehan SP, Lazenby HC, Zezza MA, et al. Age Estimates in the National Health Accounts. *Health Care Financ*  
48 *Rev* 2004;26(2):1-16. [published Online First: 2004/01/01]
- 49  
50 2. Bureau USC. Population Projections of the United States by Age, Sex, Race, and Hispanic Origin: 1995 to 2050:  
51 U.S. Census Bureau, 2004.
- 52  
53 3. Peel NM, McClure RJ, Bartlett HP. Behavioral determinants of healthy aging. *Am J Prev Med* 2005;28(3):298-  
54 304. doi: 10.1016/j.amepre.2004.12.002
- 55  
56 4. Peel N, Bartlett H, McClure R. Healthy ageing: how is it defined and measured? *Australas J Ageing*  
57 2004;23(3):115-19. doi: 10.1111/j.1741-6612.2004.00035.x

- 1
- 2
- 3 5. Fried LP, Tangen CM, Walston J, et al. Frailty in older adults: Evidence for a phenotype. *J Gerontol A-Biol*
- 4 2001;56(3):M146-M56.
- 5
- 6 6. Ferrucci L, Guralnik JM, Studenski S, et al. Designing randomized, controlled trials aimed at preventing or
- 7 delaying functional decline and disability in frail, older persons: a consensus report. *Journal of the*
- 8 *American Geriatrics Society* 2004;52(4):625-34. doi: 10.1111/j.1532-5415.2004.52174.x [published
- 9 Online First: 2004/04/07]
- 10
- 11 7. Mitnitski AB, Mogilner AJ, Rockwood K. Accumulation of deficits as a proxy measure of aging.
- 12 *ScientificWorldJournal* 2001;1:323-36.
- 13
- 14 8. Garcia-Gonzalez JJ, Garcia-Pena C, Franco-Marina F, et al. A frailty index to predict the mortality risk in a
- 15 population of senior Mexican adults. *BMC Geriatr* 2009;9:47. doi: 10.1186/1471-2318-9-471471-2318-9-
- 16 47 [pii] [published Online First: 2009/11/06]
- 17
- 18 9. Rockwood K, Howlett SE, MacKnight C, et al. Prevalence, attributes, and outcomes of fitness and frailty in
- 19 community-dwelling older adults: Report from the Canadian study of health and aging. *J Gerontol A Biol*
- 20 *Sci Med Sci* 2004;59(12):1310-17. [published Online First: 2005/02/09]
- 21
- 22 10. Freiheit EA, Hogan DB, Eliasziw M, et al. Development of a frailty index for patients with coronary artery
- 23 disease. *Journal of the American Geriatrics Society* 2010;58(8):1526-31. doi: 10.1111/j.1532-
- 24 5415.2010.02961.x [published Online First: 2010/07/17]
- 25
- 26 11. Song X, Mitnitski A, Rockwood K. Prevalence and 10-year outcomes of frailty in older adults in relation to
- 27 deficit accumulation. *Journal of the American Geriatrics Society* 2010;58(4):681-87. doi: 10.1111/j.1532-
- 28 5415.2010.02764.x [published Online First: 2010/03/30]
- 29
- 30 12. Lee DH, Buth KJ, Martin BJ, et al. Frail patients are at increased risk for mortality and prolonged institutional
- 31 care after cardiac surgery. *Circulation* 2010;121(8):973-8. doi: 10.1161/circulationaha.108.841437
- 32 [published Online First: 2010/02/18]
- 33
- 34 13. Rockwood K, Song X, MacKnight C, et al. A global clinical measure of fitness and frailty in elderly people.
- 35 *CMAJ* 2005;173(5):489-95. doi: 10.1503/cmaj.050051 [published Online First: 2005/09/01]
- 36
- 37 14. Collard RM, Boter H, Schoevers RA, et al. Prevalence of frailty in community-dwelling older persons: a
- 38 systematic review. *J Am Geriatr Soc* 2012;60(8):1487-92.
- 39
- 40 15. Rodriguez-Manas L, Feart C, Mann G, et al. Searching for an operational definition of frailty: a Delphi method
- 41 based consensus statement: the frailty operative definition-consensus conference project. *J Gerontol A*
- 42 *Biol Sci Med Sci* 2013;68(1):62-7. doi: 10.1093/gerona/gls119 [published Online First: 2012/04/19]
- 43
- 44 16. Ensrud KE, Ewing SK, Taylor BC, et al. Comparison of 2 frailty indexes for prediction of falls, disability,
- 45 fractures, and death in older women. *Arch Intern Med* 2008;168(4):382-9. doi:
- 46 10.1001/archinternmed.2007.113 [published Online First: 2008/02/27]
- 47
- 48 17. Hubbard RE, O'Mahony MS, Woodhouse KW. Characterising frailty in the clinical setting--a comparison of
- 49 different approaches. *Age Ageing* 2009;38(1):115-9. doi: 10.1093/ageing/afn252 [published Online First:
- 50 2008/11/15]
- 51
- 52 18. Sternberg SA, Wershof Schwartz A, Karunanathan S, et al. The identification of frailty: a systematic
- 53 literature review. *J Am Geriatr Soc* 2011;59(11):2129-38. doi: 10.1111/j.1532-5415.2011.03597.x
- 54 [published Online First: 2011/11/19]
- 55
- 56 19. Rockwood K, Andrew M, Mitnitski A. A comparison of two approaches to measuring frailty in elderly people.
- 57 *J Gerontol A Biol Sci Med Sci* 2007;62(7):738-43. [published Online First: 2007/07/20]
- 58
- 59 20. DeCarli C. Mild cognitive impairment: prevalence, prognosis, aetiology, and treatment. *Lancet Neurol*
- 60 2003;2(1):15-21.
21. Gauthier S, Reisberg B, Zaudig M, et al. Mild cognitive impairment. *Lancet* 2006;367(9518):1262-70. doi: Doi
- 10.1016/S0140-6736(06)68542-5
22. Levy R. Aging-associated cognitive decline. Working Party of the International Psychogeriatric Association in
- collaboration with the World Health Organization. *Int Psychogeriatr* 1994;6(1):63-8.

23. Petersen RC, Doody R, Kurz A, et al. Current concepts in mild cognitive impairment. *Arch Neurol* 2001;58(12):1985-92.
24. Folstein MF, Folstein SE, McHugh PR. "Mini-mental state". A practical method for grading the cognitive state of patients for the clinician. *J Psychiat Res* 1975;12(3):189-98.
25. Petersen RC, Stevens JC, Ganguli M, et al. Practice parameter: early detection of dementia: mild cognitive impairment (an evidence-based review). Report of the Quality Standards Subcommittee of the American Academy of Neurology. *Neurology* 2001;56(9):1133-42.
26. Langa KM, Levine DA. The diagnosis and management of mild cognitive impairment: a clinical review. *Jama* 2014;312(23):2551-61.
27. Petersen RC, Caracciolo B, Brayne C, et al. Mild cognitive impairment: a concept in evolution. *J Intern Med* 2014;275(3):214-28.
28. Ganguli M, Belle S, Ratcliff G, et al. Sensitivity and specificity for dementia of population-based criteria for cognitive impairment: the MoVIES project. *Journal of gerontology* 1993;48(4):M152-61.
29. Weuve J, Kang JH, Manson JE, et al. Physical activity, including walking, and cognitive function in older women. *Jama* 2004;292(12):1454-61.
30. Yaffe K, Krueger K, Sarkar S, et al. Cognitive function in postmenopausal women treated with raloxifene. *N Engl J Med* 2001;344(16):1207-13.
31. Mitchell AJ. A meta-analysis of the accuracy of the mini-mental state examination in the detection of dementia and mild cognitive impairment. *J Psychiat Res* 2009;43(4):411-31.
32. Lytle ME, Vander Bilt J, Pandav RS, et al. Exercise level and cognitive decline: the MoVIES project. *Alzheimer Dis Assoc Disord* 2004;18(2):57-64.
33. Ahmed T, Haboubi N. Assessment and management of nutrition in older people and its importance to health. *Clinical interventions in aging* 2010;5:207-16. [published Online First: 2010/08/17]
34. Shahar D, Shai I, Vardi H, et al. Dietary intake and eating patterns of elderly people in Israel: who is at nutritional risk? *European journal of clinical nutrition* 2003;57(1):18-25. doi: 10.1038/sj.ejcn.1601523 [published Online First: 2003/01/28]
35. Diet, Nutrition, and the Prevention of Chronic Diseases. Geneva, Switzerland: World Heart Organization, 1990.
36. Arvaniti F, Panagiotakos DB. Healthy indexes in public health practice and research: a review. *Crit Rev Food Sci Nutr* 2008;48(4):317-27. doi: 10.1080/10408390701326268792117311 [pii] [published Online First: 2008/04/15]
37. Patterson RE, Haines PS, Popkin BM. Diet quality index: capturing a multidimensional behavior. *J Am Diet Assoc* 1994;94(1):57-64. doi: 0002-8223(94)92042-7 [pii] [published Online First: 1994/01/01]
38. Guenther PM, Casavale KO, Reedy J, et al. Update of the Healthy Eating Index: HEI-2010. *J Acad Nutr Diet* 2013;113(4):569-80. doi: 10.1016/j.jand.2012.12.016
39. Deckelbaum RJ, Fisher EA, Winston M, et al. Summary of a scientific conference on preventive nutrition: pediatrics to geriatrics. *Circulation* 1999;100(4):450-6.
40. Bollwein J, Diekmann R, Kaiser MJ, et al. Distribution but not amount of protein intake is associated with frailty: a cross-sectional investigation in the region of Nurnberg. *Nutr J* 2013;12 doi: Artn 10910.1186/1475-2891-12-109
41. Willett WC, Sacks F, Trichopoulos A, et al. Mediterranean Diet Pyramid - a Cultural Model for Healthy Eating. *Am J Clin Nutr* 1995;61(6):1402s-06s.
42. Leon-Munoz LM, Guallar-Castillon P, Lopez-Garcia E, et al. Mediterranean Diet and Risk of Frailty in Community-Dwelling Older Adults. *J Am Med Dir Assoc* 2014;15(12):899-903. doi: 10.1016/j.jamda.2014.06.013



- 1  
2  
3  
4  
5  
6  
7  
8  
9  
10  
11  
12  
13  
14  
15  
16  
17  
18  
19  
20  
21  
22  
23  
24  
25  
26  
27  
28  
29  
30  
31  
32  
33  
34  
35  
36  
37  
38  
39  
40  
41  
42  
43  
44  
45  
46  
47  
48  
49  
50  
51  
52  
53  
54  
55  
56  
57  
58  
59  
60
43. Talegawkar SA, Bandinelli S, Bandeen-Roche K, et al. A Higher Adherence to a Mediterranean-Style Diet Is Inversely Associated with the Development of Frailty in Community-Dwelling Elderly Men and Women. *J Nutr* 2012;142(12):2161-66. doi: 10.3945/jn.112.165498
  44. Scarmeas N, Stern Y, Mayeux R, et al. Mediterranean diet, Alzheimer disease, and vascular mediation. *Arch Neurol* 2006;63(12):1709-17.
  45. Luchsinger JA, Mayeux R. Dietary factors and Alzheimer's disease. *Lancet Neurol* 2004;3(10):579-87.
  46. ICDC. Mabat Zahav National Health and Nutrition Survey age 65 and over 2005-6. [https://www.health.gov.il/PublicationsFiles/Mabat\\_2005-2006-a.pdf](https://www.health.gov.il/PublicationsFiles/Mabat_2005-2006-a.pdf), 2011.
  47. Zimet GD, Powell SS, Farley GK, et al. Psychometric Characteristics of the Multidimensional Scale of Perceived Social Support. *J Pers Assess* 1990;55(3-4):610-17. doi: DOI 10.1207/s15327752jpa5503&4\_17
  48. Hoyl MT, Alessi CA, Harker JO, et al. Development and testing of a five-item version of the Geriatric Depression Scale. *J Am Geriatr Soc* 1999;47(7):873-78.
  49. Ware JE, Kosinski M, Keller SD. A 12-item short-form health survey - Construction of scales and preliminary tests of reliability and validity. *Med Care* 1996;34(3):220-33. doi: Doi 10.1097/00005650-199603000-00003
  50. Mitnitski AB, Mogilner AJ, Rockwood K. Accumulation of deficits as a proxy measure of aging. *ScientificWorldJournal* 2001;1:323-36. doi: 10.1100/tsw.2001.58 [published Online First: 2003/06/14]
  51. Health IMo. [Available from: [https://www.health.gov.il/UnitsOffice/ICDC/mabat/Pages/Mabat\\_Gold.aspx](https://www.health.gov.il/UnitsOffice/ICDC/mabat/Pages/Mabat_Gold.aspx).
  52. Crum RM, Anthony JC, Bassett SS, et al. Population-Based Norms for the Mini-Mental-State-Examination by Age and Educational-Level. *Jama-J Am Med Assoc* 1993;269(18):2386-91. doi: DOI 10.1001/jama.269.18.2386
  53. KoBotoobox software [Available from: <http://www.kobotoolbox.org/>.
  54. Tzamert software: Nutrition Department of the Ministry of Health [Available from: <https://www.health.gov.il/Subjects/FoodAndNutrition/Nutrition/professionals/Pages/Tzameret.aspx>
  55. Guenther PM, Casavale KO, Reedy J, et al. Update of the Healthy Eating Index: HEI-2010. *Journal of the Academy of Nutrition and Dietetics* 2013;113(4):569-80. doi: 10.1016/j.jand.2012.12.016 [published Online First: 2013/02/19]
  56. Johnson RK, Driscoll P, Goran MI. Comparison of multiple-pass 24-hour recall estimates of energy intake with total energy expenditure determined by the doubly labeled water method in young children. *J Am Diet Assoc* 1996;96(11):1140-4.
  57. Blumberg SJ, Bialostosky K, Hamilton WL, et al. The effectiveness of a short form of the Household Food Security Scale. *Am J Public Health* 1999;89(8):1231-4. [published Online First: 1999/08/05]
  58. Bauer JM, Kaiser MJ, Anthony P, et al. The Mini Nutritional Assessment--its history, today's practice, and future perspectives. *Nutr Clin Pract* 2008;23(4):388-96. doi: 10.1177/088453360832113223/4/388 [pii] [published Online First: 2008/08/07]
  59. Myers V, Drory Y, Gerber Y, et al. Clinical relevance of frailty trajectory post myocardial infarction. *Eur J Prev Cardiol* 2014;21(6):758-66.
  60. Fried LP, Tangen CM, Walston J, et al. Frailty in older adults: evidence for a phenotype. *J Gerontol A Biol Sci Med Sci* 2001;56(3):M146-56. [published Online First: 2001/03/17]
  61. Washburn RA, Smith KW, Jette AM, et al. The Physical Activity Scale for the Elderly (PASE): development and evaluation. *J Clin Epidemiol* 1993;46(2):153-62.
  62. Tombaugh TN, McIntyre NJ. The mini-mental state examination: a comprehensive review. *J Am Geriatr Soc* 1992;40(9):922-35.
  63. Crum RM, Anthony JC, Bassett SS, et al. Population-based norms for the Mini-Mental State Examination by age and educational level. *Jama* 1993;269(18):2386-91.
  64. Vertesi A, Lever JA, Molloy DW, et al. Standardized mini-mental state examination - Use and interpretation. *Can Fam Physician* 2001;47:2018-23.

- 1
- 2
- 3 65. Katz S, Downs TD, Cash HR, et al. Progress in development of the index of ADL. *Gerontologist* 1970;10(1):20-
- 4 30. [published Online First: 1970/01/01]
- 5 66. Zimet GD, Dahlem NW, Zimet SG, et al. The Multidimensional Scale of Perceived Social Support. *J Pers Assess*
- 6 1988;52(1):30-41. doi: DOI 10.1207/s15327752jpa5201\_2
- 7 67. Tsai AC, Chang T-L, Yang T-W, et al. A modified mini nutritional assessment without BMI predicts nutritional
- 8 status of community-living elderly in Taiwan. *The journal of nutrition, health & aging* 2010;14(3):183-89.
- 9 68. Smith L. New AHA recommendations for blood pressure measurement. *Am Fam Physician* 2005;72(7):1391-
- 10 9.
- 11 69. Benjamin EJ, Blaha MJ, Chiuve SE, et al. Heart Disease and Stroke Statistics-2017 Update A Report From the
- 12 American Heart Association. *Circulation* 2017;135(10):E146-E603. doi: 10.1161/Cir.0000000000000485
- 13 70. Cox DR. Regression Models and Life-Tables. *J R Stat Soc B* 1972;34(2):187-+.
- 14 71. Austin PC. An Introduction to Propensity Score Methods for Reducing the Effects of Confounding in
- 15 Observational Studies. *Multivar Behav Res* 2011;46(3):399-424. doi: Pii
- 16 93847000010.1080/00273171.2011.568786
- 17 72. Harrell FE, Lee KL, Mark DB. Multivariable prognostic models: Issues in developing models, evaluating
- 18 assumptions and adequacy, and measuring and reducing errors. *Stat Med* 1996;15(4):361-87. doi: Doi
- 19 10.1002/(Sici)1097-0258(19960229)15:4<361::Aid-Sim168>3.0.Co;2-4
- 20 73. Cohen J. Weighted Kappa - Nominal Scale Agreement with Provision for Scaled Disagreement or Partial
- 21 Credit. *Psychol Bull* 1968;70(4):213-&. doi: DOI 10.1037/h0026256
- 22 74. Dominguez-Almendros S, Benitez-Parejo N, Gonzalez-Ramirez AR. Logistic Regression Models. *Allergol*
- 23 *Immunopath* 2011;39(5):295-305. doi: 10.1016/j.aller.2011.05.002
- 24 75. Rosenbaum PR, Rubin DB. The Central Role of the Propensity Score in Observational Studies for Causal
- 25 Effects. *Biometrika* 1983;70(1):41-55. doi: DOI 10.1093/biomet/70.1.41
- 26 76. Hernan MA, Hernandez-Diaz S, Robins JM. A structural approach to selection bias. *Epidemiology*
- 27 2004;15(5):615-25. doi: 10.1097/01.ede.0000135174.63482.43
- 28 77. Robins JM, Hernan MA, Brumback B. Marginal structural models and causal inference in epidemiology.
- 29 *Epidemiology* 2000;11(5):550-60. doi: Doi 10.1097/00001648-200009000-00011
- 30 78. Nelder JA, Wedderburn RW. Generalized Linear Models. *J R Stat Soc Ser a-G* 1972;135(3):370-+. doi: Doi
- 31 10.2307/2344614
- 32 79. Trumbo P, Schlicker S, Yates AA, et al. Dietary reference intakes for energy, carbohydrate, fiber, fat, fatty
- 33 acids, cholesterol, protein and amino acids. *J Am Diet Assoc* 2002;102(11):1621-30. doi: Doi
- 34 10.1016/S0002-8223(02)90346-9
- 35 80. Trumbo P, Yates AA, Schlicker S, et al. Dietary reference intakes: Vitamin A, vitamin K, arsenic, boron,
- 36 chromium, copper, iodine, iron, manganese, molybdenum, nickel, silicon, vanadium, and zinc. *J Am Diet*
- 37 *Assoc* 2001;101(3):294-301. doi: Doi 10.1016/S0002-8223(01)00078-5
- 38 81. Rubin DB. Multiple imputation for nonresponse in surveys: John Wiley & Sons 2004.
- 39 82. Collard RM, Boter H, Schoevers RA, et al. Prevalence of frailty in community-dwelling older persons: a
- 40 systematic review. *J Am Geriatr Soc* 2012;60(8):1487-92. doi: 10.1111/j.1532-5415.2012.04054.x
- 41 [published Online First: 2012/08/14]
- 42 83. Fried LP. Epidemiology of aging. *Epidemiol Rev* 2000;22(1):95-106.
- 43 84. Guenther PM, Reedy J, Krebs-Smith SM, et al. Evaluation of the Healthy Eating Index-2005. *J Am Diet Assoc*
- 44 2008;108(11):1854-64. doi: 10.1016/j.jada.2008.08.011
- 45 85. Guenther PM, Kirkpatrick SI, Reedy J, et al. The Healthy Eating Index-2010 Is a Valid and Reliable Measure of
- 46 Diet Quality According to the 2010 Dietary Guidelines for Americans. *The Journal of Nutrition*
- 47 2014;144(3):399-407. doi: 10.3945/jn.113.183079
- 48 86. Zimmerman TP, Hull SG, McNutt S, et al. Challenges in converting an interviewer-administered food probe
- 49 database to self-administration in the National Cancer Institute automated self-administered 24-hour
- 50 recall (ASA24). *J Food Compos Anal* 2009;22:S48-S51. doi: 10.1016/j.jfca.2009.02.003
- 51
- 52
- 53
- 54
- 55
- 56
- 57
- 58
- 59
- 60

1  
2  
3 87. Jonnalagadda SS, Mitchell DC, Smiciklas-Wright H, et al. Accuracy of energy intake data estimated by a  
4 multiple-pass, 24-hour dietary recall technique. *J Am Diet Assoc* 2000;100(3):303-11. doi: Doi  
5 10.1016/S0002-8223(00)00095-X

6  
7 88. Raper N, Perloff B, Ingwersen L, et al. An overview of USDA's dietary intake data system. *J Food Compos Anal*  
8 2004;17(3-4):545-55. doi: 10.1016/j.jfca.2004.02.013  
9

## 10 11 12 **Figure legends:**

13  
14 Figure 1: Study design sketch. <sup>1</sup>Mini Mental State Examination; <sup>2</sup>General Health Questionnaire;  
15  
16 <sup>3</sup>Activities of Daily Living; <sup>4</sup>Mini Nutritional Assessment-Short Form; <sup>5</sup>Healthy Eating Index; <sup>6</sup>Geriatric  
17  
18 Depression Scale; <sup>7</sup>Short Form of health-related-quality of life.  
19

20 Figure 2: Sample size flow chart.  
21  
22  
23  
24

## 25 **Footnotes**

### 26 27 **Authors' contributions**

28  
29  
30 AG, study coordinator of the ILSA, drafted the manuscript, assisted in the conception of the study and  
31 led field activities and study monitoring; UG, co-investigator for the ILSA, conceived of the study  
32 concept and design and supervised the study; T Shohat, co-investigator of the ILSA and physician-in-  
33 charge of the study; LKB, principal investigator of MABAT ZAHAV survey; T Shimony, coordinator of  
34 MABAT ZAHAV survey; YG, principal investigator of the ILSA, conceived of the study concept and  
35 design and co-drafted the manuscript. All authors revised, reviewed and approved the final paper.  
36  
37  
38  
39  
40

### 41 **Funding**

42  
43 This study is supported by grant no.3-12787 from the Chief Scientist Office, Ministry of Health  
44 (principal investigator, YG), and The Bircher-Benner Foundation, Tel Aviv University (principal  
45 investigator, YG).  
46  
47  
48

### 49 **Competing interests**

50  
51 The authors declare that they have no competing interests.  
52  
53  
54  
55  
56  
57  
58  
59  
60



1  
2  
3  
4  
5  
6 **Acknowledgments**  
7

8 We are indebted to all those who agree to participate in the study for their cooperation and patience  
9 answering our comprehensive questionnaire and their willingness to let us into their homes. We are  
10 grateful for our professional and dedicated study team: Osnat Fried, B.Sc, Michal Weber, B.Sc, RD, Rana  
11 Younis, B.Sc, RD and Polina Pokrass, B.A, RN.  
12  
13  
14  
15  
16  
17  
18  
19  
20  
21  
22  
23  
24  
25  
26  
27  
28  
29  
30  
31  
32  
33  
34  
35  
36  
37  
38  
39  
40  
41  
42  
43  
44  
45  
46  
47  
48  
49  
50  
51  
52  
53  
54  
55  
56  
57  
58  
59  
60

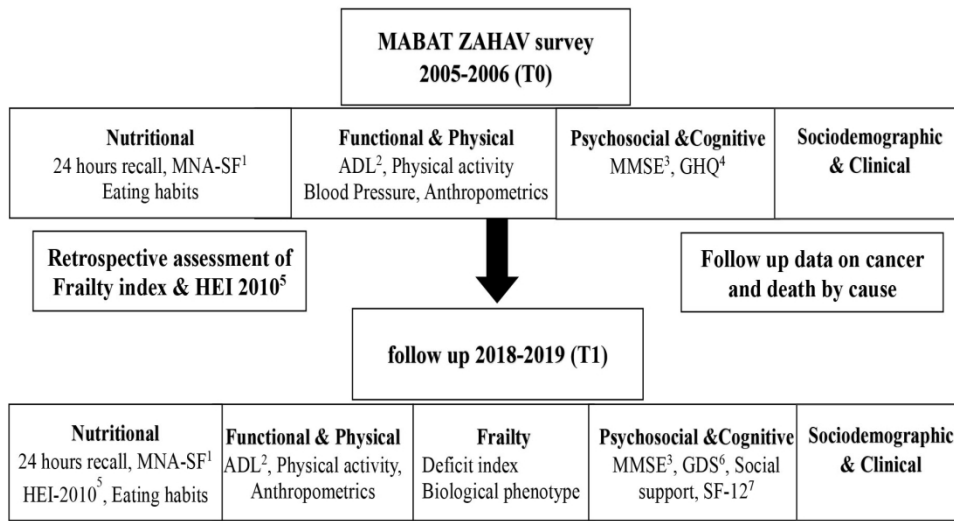

Figure 1: Research design sketch.<sup>1</sup>Mini Mental State Examination; <sup>2</sup>General Health Questionnaire; <sup>3</sup>Activities of Daily Living; <sup>4</sup>Mini Nutritional Assessment– Short Form; <sup>5</sup>Healthy Eating Index; <sup>6</sup>Geriatric Depression Scale; <sup>7</sup>Short Form of health-related-quality of life.

162x91mm (300 x 300 DPI)

1  
2  
3  
4  
5  
6  
7  
8  
9  
10  
11  
12  
13  
14  
15  
16  
17  
18  
19  
20  
21  
22  
23  
24  
25  
26  
27  
28  
29  
30  
31  
32  
33  
34  
35  
36  
37  
38  
39  
40  
41  
42  
43  
44  
45  
46  
47  
48  
49  
50  
51  
52  
53  
54  
55  
56  
57  
58  
59  
60



Figure 2. Sample size flow chart.

91x111mm (300 x 300 DPI)

# BMJ Open

## Diet Quality in Relation to Healthy Aging. The Israeli Longitudinal Study on Aging (ILSA): Study Protocol.

|                                 |                                                                                                                                                                                                                                                                                                                                                                                                                                                                                                                                                                              |
|---------------------------------|------------------------------------------------------------------------------------------------------------------------------------------------------------------------------------------------------------------------------------------------------------------------------------------------------------------------------------------------------------------------------------------------------------------------------------------------------------------------------------------------------------------------------------------------------------------------------|
| Journal:                        | <i>BMJ Open</i>                                                                                                                                                                                                                                                                                                                                                                                                                                                                                                                                                              |
| Manuscript ID                   | bmjopen-2018-024673.R2                                                                                                                                                                                                                                                                                                                                                                                                                                                                                                                                                       |
| Article Type:                   | Protocol                                                                                                                                                                                                                                                                                                                                                                                                                                                                                                                                                                     |
| Date Submitted by the Author:   | 23-Jan-2019                                                                                                                                                                                                                                                                                                                                                                                                                                                                                                                                                                  |
| Complete List of Authors:       | Goshen, Abigail; Tel Aviv University, Epidemiology and Preventive Medicine<br>Goldbourt, Uri; Tel Aviv University, Epidemiology and Preventive Medicine<br>Shohat, Tamar; Tel Aviv University, Epidemiology and Preventive Medicine; State of Israel Ministry of Health, Israel Center for Disease Control<br>Shimony, Tal ; State of Israel Ministry of Health, Israel Center for Disease Control<br>Keinan-Boker, Lital; State of Israel Ministry of Health, Israel Center for Disease Control<br>Gerber, Yariv; Tel Aviv University, Epidemiology and Preventive Medicine |
| <b>Primary Subject Heading</b>: | Geriatric medicine                                                                                                                                                                                                                                                                                                                                                                                                                                                                                                                                                           |
| Secondary Subject Heading:      | Nutrition and metabolism, Epidemiology                                                                                                                                                                                                                                                                                                                                                                                                                                                                                                                                       |
| Keywords:                       | diet quality, older adults, healthy aging, longitudinal studies, EPIDEMIOLOGY                                                                                                                                                                                                                                                                                                                                                                                                                                                                                                |
|                                 |                                                                                                                                                                                                                                                                                                                                                                                                                                                                                                                                                                              |

SCHOLARONE™  
Manuscripts

# Diet Quality in Relation to Healthy Aging.

## The Israeli Longitudinal Study on Aging (ILSA): Study Protocol.

Abigail Goshen<sup>1</sup>, Uri Goldbourt<sup>1</sup>, Tamar Shohat<sup>1,2</sup>, Tal Shimony<sup>2</sup>, Lital Keinan-Boker<sup>2</sup>, Yariv Gerber<sup>1</sup>

1. Dept. of Epidemiology and Preventive Medicine, School of Public Health, Sackler Faculty of Medicine, Tel Aviv University, Ramat Aviv, Tel Aviv, 6997801, Israel.
2. Israel Center for Disease Control, Israel Ministry of Health, Ramat Gan, Israel.

Abigail Goshen: [abigail1@mail.tau.ac.il](mailto:abigail1@mail.tau.ac.il)

Uri Goldbourt: [goldbu1@tauex.tau.ac.il](mailto:goldbu1@tauex.tau.ac.il)

Tamar Shohat: [tamar.shohat2@moh.gov.il](mailto:tamar.shohat2@moh.gov.il)

Tal Shimony: [Tal.Shimony@moh.gov.il](mailto:Tal.Shimony@moh.gov.il)

Lital Keinan-Boker: [Lital.Keinan2@moh.gov.il](mailto:Lital.Keinan2@moh.gov.il)

Yariv Gerber: [yarivgerber@gmail.com](mailto:yarivgerber@gmail.com)

**Corresponding author:** Yariv Gerber, PhD, Department of Epidemiology and Preventive Medicine, School of Public Health, Sackler Faculty of Medicine, Tel Aviv University, Ramat Aviv, Tel Aviv, 6997801, Israel. Email: [yarivgerber@gmail.com](mailto:yarivgerber@gmail.com)

# Diet Quality in Relation to Healthy Aging.

## The Israeli Longitudinal Study on Aging (ILSA): Study Protocol.

**Introduction:** Population aging is accelerating rapidly in Israel as well as worldwide, necessitating adaptation of the health care system and consideration of new approaches that serve the specific needs of older adults. In addition to cognitive function, frailty is one of the most challenging expressions of physical and mental aging, a multidimensional syndrome of increased vulnerability. Several studies have shown that low intake of certain micronutrients and protein is associated with higher risk of frailty and cognitive impairment. However, whether global diet quality is involved in the etiology of the latter outcomes is unclear.

**Methods and analysis:** We are conducting, among older adult subjects who took part in "MABAT ZAHAV" (Israeli National Health and Nutrition Survey of Older Adults) in 2005-2006 (T0, N=1,852) an extensive follow-up interview (T1) that includes comprehensive geriatric assessment and evaluation of general health and quality of life. Diet quality is evaluated using the Healthy Eating Index (HEI) 2010, based on 24-hour diet recall measured at T0 and T1. Frailty is assessed using two different approaches: the phenotype framework and the accumulation of deficits model. Cognitive function is assessed by Mini Mental State Examination (MMSE) and cognitive decline by the difference between repeated MMSE measurements. Different analytic methods will be applied to evaluate the role of diet quality in development of frailty and cognitive decline with inverse probability weighting used to minimize attrition bias. About 600 subjects are expected to be interviewed between May 2017 and December 2019.

**Ethics and dissemination:** Ethical approval was obtained from the Helsinki Committee of Sheba Medical Center, Tel Hashomer, Israel and the Ethical Committee of Tel-Aviv University. All participants sign an informed consent form. The findings of the study will be published in peer-reviewed journals.

**Keywords:** diet quality; epidemiology; older adults; healthy aging; longitudinal studies

### Strengths and limitations of this study

- The study transforms a large national survey of older adults with a broad-spectrum data into a cohort study with a specific age-related questionnaire including comprehensive geriatric assessment.
- Obtaining data at two points in time, more than a decade apart, will allow us to evaluate long-term changes in older adult population and examine adverse clinical outcomes.
- Selection bias due to death, loss to follow-up and non-response.
- Misclassification bias due to self-report data and nutritional assessment which is based on a single 24-hour dietary recall.

## Background

### Healthy aging

Population aging is accelerating rapidly in Israel as well as worldwide, necessitating adaptation of the health care systems and consideration of new approaches that serve the specific needs of older adults <sup>1</sup>. According to current forecasts, the percentage of persons 65 years and older will increase from 8.5% in 2015 to 19.0% by 2030 <sup>2</sup>. The concept of healthy aging is generally described as optimizing opportunities for improving and preserving health and physical, social, and mental health; and enhancing successful life-course transitions <sup>3</sup>. While this definition depicts healthy aging (also termed successful aging) as a complex process of adaptation to changes across the lifespan, the concept needs to be looked at in terms of a measurable outcome that can be empirically validated <sup>4</sup>. Despite the differences in healthy aging definitions, there is some consensus in the studies that 'successful ager' outcome should measure function in domains of cognitive, physical and mental well-being <sup>4</sup>. In our study, we intend to transform a large national survey of older adults into a cohort study with specific age-related questionnaires including general health, functional status, quality of life, social support, depression and cognitive function. Healthy aging is assessed by various scientifically recognized measures, with emphasis on frailty state and cognitive function. The predictive role of diet quality in the development of the latter outcomes will be evaluated, as described in detail in the following sections.

### Frailty



1  
2  
3 Frailty is recognized as an important medical syndrome of decreased reserve and resistance to  
4 stressors, resulting from cumulative declines across multiple physiologic systems<sup>5</sup>. Frail older  
5 persons are at high risk of accelerated physical and cognitive functional decline, disability, and death  
6  
7  
8  
9  
10  
11  
12  
13  
14  
15  
16  
17  
18  
19  
20  
21  
22  
23  
24  
25  
26  
27  
28  
29  
30  
31  
32  
33  
34  
35  
36  
37  
38  
39  
40  
41  
42  
43  
44  
45  
46  
47  
48  
49  
50  
51  
52  
53  
54  
55  
56  
57  
58  
59  
60

6. The concept of frailty adopts an integrative approach which represents general properties of aging and health rather than particular functional deficiency or decline<sup>7</sup>.

Assessment of frailty has implications both for the individual and on society at large, forecasting healthcare use<sup>8,9</sup> and providing opportunities for preventive intervention<sup>10,11</sup>, thus making it a key issue in chronic disease management and healthy aging<sup>12,13</sup>.

Methods to measure frailty vary throughout the literature<sup>14-17</sup>, with two principal models of frailty emerging: **(1)** The Fried and colleagues' *Biological Phenotype*<sup>5</sup> framework, which conceptualizes frailty as a biologic syndrome characterized by a decline in overall function and loss of resistance to stressors. This model is comprised of five physical indicators including low physical activity, weak grip strength, slow walking speed, exhaustion, and unintentional weight loss. **(2)** The Rockwood and colleagues' *Accumulation of Deficits Index*<sup>18</sup>, which defines frailty as the cumulative effect of individual deficits. Under this model, frailty is measured by ~40 parameters of disease states, functional status, cognitive function, and psychosocial status, collectively referred to as deficits. The index is a calculation of the presence or absence of each deficit as a proportion of total<sup>8</sup>. Frailty and successful aging models share common aspects of aging<sup>19</sup>. Frailty is recognized as an independent determinant of successful aging, supporting the idea that successful agers might be nonfrail individuals<sup>19,20</sup>.

### Cognitive function

Another important aspect of successful aging is the maintenance of cognitive function<sup>21</sup>. Cognitive function is a predictor of independence and quality of life<sup>22</sup>. Cognitive function assessed repeatedly is important because it is possible for an elderly person to have a normal cognitive score that still represents a significant decline for that individual. Mild cognitive impairment (MCI) is a syndrome that is currently thought of as a transition phase between healthy cognitive aging and dementia<sup>23</sup>. MCI is defined as cognitive decline greater than expected for an individual's age and education level but that does not interfere notably with Activities of Daily Life (ADL)<sup>24</sup>. The estimated prevalence of MCI in population-based studies ranges from 10% to 20% in people older than 65 years of age. Clinical studies indicate that older adults with MCI will progress to Alzheimer's Disease (AD) at a rate of 10% to 15% per year, compared with healthy control subjects who convert at a rate of 1% to 2% per year<sup>25</sup>, making it an area of intense interest for theoretical and practical reasons. A widely recognized instrument for detection of cognitive impairment is the Mini-Mental State Examination

1  
2  
3 (MMSE)<sup>26 27</sup>. The MMSE consists of thirty questions and has a maximum score of 30 points. MCI  
4 will be assessed according to poor performance on MMSE (i.e., a score of 1.5 standard deviations  
5 below the age- and education-specific mean) and preserved independence in functional abilities<sup>27 28</sup>.  
6  
7  
8

## 9 **Nutrition**

10  
11 Nutrition is an important element that affects and is affected by the aging process<sup>29 30</sup>. Malnutrition is  
12 highly prevalent among older adults and associated with a general decline in physical and mental  
13 functioning, higher hospitalization rate and increased mortality<sup>29</sup>. Eating patterns of various cultures  
14 around the world have been associated with risk for chronic diseases<sup>31</sup>. However, examining the  
15 intake of a single nutrient or food group does not account for the complexity of dietary intake, as food  
16 and nutrients are not eaten in isolation. Consequently, indices of dietary quality, patterns, and variety  
17 are increasingly used by nutritional epidemiologists<sup>32</sup>. The Healthy Eating Index-2010 (HEI-2010)<sup>33</sup>  
18 is such an index, originally released in 1995 and then updated in 2010 by the US Department of  
19 Agriculture (USDA) as a measure of diet quality. The concept of diet quality as a determinant of  
20 frailty development is not new but whether it is a predictor or consequence of frailty has not been  
21 investigated adequately<sup>34</sup>. Several studies have shown that low intake of certain micronutrients and  
22 protein is associated with a higher risk of developing frailty. However, very few studies have  
23 assessed the effect of overall diet quality on frailty<sup>35</sup>. Two studies have suggested that increasing  
24 adherence to Mediterranean diet (MD, a diet characterized by high intake of fish, vegetables,  
25 legumes, fruits, cereals, and unsaturated fatty acids<sup>36</sup>) is associated with decreasing risk of frailty  
26 among community-dwelling older adults in Spain and Italy<sup>37 38</sup>. In addition, it was recently  
27 demonstrated that higher adherence to MD is associated with lower AD risk<sup>39 40</sup>. However, in most  
28 studies the MD score was defined from sample-specific scores; thus, only the relative but not the  
29 absolute effect of MD was assessed, and the results of these studies are difficult to compare across  
30 populations.  
31  
32  
33  
34  
35  
36  
37  
38  
39  
40  
41  
42  
43  
44  
45  
46  
47  
48  
49  
50  
51  
52  
53  
54  
55  
56  
57  
58  
59  
60

## **Research Objective**

## General objective

Investigate the relationship between diet quality and healthy aging as assessed by scientifically recognized measures.

## Specific aims

**A.** Develop a frailty index based on "Mabat Zahav" data (T0) and evaluate its prevalence and association with subsequent survival.

**B.** Examine the predictive role of diet quality in development of frailty, cognitive changes and other healthy aging aspects among study participants.

**C.** Investigate long-term changes of dietary consumption and nutritional status among study participants.

## Hypothesis

We hypothesize that frailty will be associated with survival and that diet quality in older adults is predictive of successful aging as measured by a variety of clinical outcomes.

## Methods/Design

### Research design

The study employs a cohort study design. It constitutes the second interview of Mabat Zahav study<sup>41</sup>. The First National Health and Nutrition Survey of Older Adults Aged 65 and Over in Israel ("Mabat Zahav") was carried out in 2005-2006 by the Israel Center for Disease Control (ICDC) and the Nutrition Department of the Israel Ministry of Health. The data collected on the survey included information regarding health and nutrition status, health behaviors (physical activity, alcohol consumption, medication use, use of nutrition supplements), knowledge and attitudes regarding nutrition, and utilization of health services. The survey framework and population is further described in the following section. The current study questionnaire (T1) duplicates most parts of the original (T0) interview (Fig. 1). In addition, measurements pertaining to frailty status and cognitive function are performed, as well as psychosocial assessments including the multidimensional scale of perceived social support (MSPSS)<sup>42</sup>, geriatric depression scale (GDS)<sup>43</sup> and the short form of health-related-quality of life (SF-12)<sup>44</sup>. The added psychosocial questionnaires are in order to enable a more comprehensive analysis of the concept of healthy aging and well-being. The HEI-2010, a measure of diet quality retrospectively assessed at T0, will serve as the exposure variable and be assessed prospectively at T1 in order to evaluate general changes in diet quality and composition.

1  
2  
3 Frailty at T0 is retrospectively assessed through the Rockwood and colleagues' Deficit Index<sup>18 45</sup>.  
4 The index will be developed according to published criteria in order to identify frail participants at  
5 study entry. Frailty will be assessed prospectively at T1 by both the Deficit Index and the Fried and  
6 colleagues' Biological Phenotype framework<sup>5</sup>. Cognitive changes and MCI will be assessed  
7 prospectively. Mortality follow up will be conducted among T0 participants through linkage to the  
8 nationwide database of causes of death (compiled by the Central Bureau of Statistics) via their  
9 national identification numbers.  
10  
11  
12  
13  
14

### 15 **"Mabat Zahav" survey – study population**

16 The Mabat Zahav survey population was a random sample of Israeli citizens age  $\geq 65$  years old. The  
17 survey included 1,852 community-dwelling participants (1,536 Jews and 316 Arabs) residing in  
18 Israel, who had lived in the country for at least one year in urban and rural settlements with more  
19 than 20,000 residents. Exclusion criteria of Mabat Zahav survey included: significant cognitive  
20 reduction (MMSE $<17$ ) and hospitalization at the time of the study. Survey methods included a  
21 personal interview in the interviewees' homes or sheltered accommodation using a structured  
22 questionnaire.  
23  
24  
25  
26  
27  
28  
29

30 Sampling frame: Adults aged 65 and over insured by the two major HMO in Israel, Clalit Health  
31 Services and Maccabi Health Services, representing 86.3% of all of the elderly in Israel, were  
32 sampled. Oversampling was carried out in the Arab population, because of the small percentage of  
33 elderly in the Arab population (6.3%), in order to ensure a sample large enough for statistical  
34 analyses and comparisons with the Jewish sector. The overall sample size target was 1,800  
35 participants, 1,500 Jews, and 300 Arabs.  
36  
37  
38  
39

40 Sampling method: Lists of insured older adults from each of the two HMO were combined and  
41 divided into population groups (Jews and Arabs). Sampling was carried out in two stages due to low  
42 response rate at the first stage, in order to meet the sample size target. First stage: 5,100 people were  
43 randomly sampled, with 4,250 from the Jewish list and 850 from the Arab list. Interviewing of  
44 individuals from the first sample commenced in July 2005. A total of 1,081 individuals were  
45 interviewed, of which 1,051 questionnaires met inclusion criteria (909 Jews and 142 Arabs). Second  
46 stage: An additional sample was drawn in January 2006, including 4,250 Jews and 2,500 Arabs,  
47 since the initial lists were exhausted. A total of 771 individuals were interviewed, of which 748  
48 questionnaires met inclusion criteria (590 Jews and 158 Arabs). The interviews were held in multiple  
49 languages, and the questionnaires were translated accordingly: 1277 (69%) in Hebrew, 316 (17%) in  
50 Arabic, 257 (14%) in Russian and 2 in English<sup>41</sup>. All data collected are available online at the  
51 ministry of health government web site<sup>46</sup>.  
52  
53  
54  
55  
56  
57  
58  
59  
60

### Exclusion criterion in current research stage (T1):

Significant cognitive reduction as measured by a MMSE score of less than 17<sup>26 47</sup> or inability to communicate.

### Sample size

Among T0 initial participants (1,852), 1,799 (1,499 Jews and 300 Arabs) questionnaires were included in the final survey analysis. Forty-six participants (29 Jews and 17 Arabs) had a MMSE score of less than 17 (after adjustment for age and education), and seven questionnaires were only partially completed and therefore excluded from the statistical analysis. According to the mortality registry of the Ministry of Health, 1,115 participants were alive in February 2017. We assume that 25% of candidates will be unable to participate due to either exclusion criteria or severe medical condition and another 20% could not be contacted due to address or telephone number changes. We expect a response rate of 55%-60% among the remaining candidates for T1 interview, and so about 600 subjects are expected to be re-interviewed (Fig.2). Our efforts to maximize recruitment include the following steps:

Disconnected phone numbers and no response: **a.** Locating address changes via the Ministry of Interior database. **b.** Searching by the Israeli non-commercial telephone directory according to city of residence and family name only (in case of incorrect street name). **c.** Conducting ten attempts to contact each non-respondent.

Refusal: We are trying to encourage cooperation by **a.** Offering to conduct interviews 7 days a week, morning times and afternoons. **b.** Offering to divide the interview into two separate times, in case the length of the interview is a concern for the participant.

### Data collection

A personal interview is conducted in the interviewees' homes by trained interviewers using a structured questionnaire. Anthropometric measurements are performed using standardized protocols as described in a subsequent section. Interviews are conducted in Hebrew, Arabic or Russian. Estimated time of an interview is an hour and a half. In case the participant is unable to complete the questionnaire by himself/herself, but still meets inclusion criteria, information from a proxy is obtained regarding dietary intake, chronic diseases, ADL, sociodemographic status and medication use. The proxy interview does not include the following assessments: GDS, SF-12, MSPSS and self-rated health. All data (except the 24-hour dietary recall) are collected using KoBotoolbox<sup>48</sup> software which is a freely available application to design surveys for data collection through smart devices

1  
2  
3 and run on Android based platforms. The data are exported into a password protected Excel file on a  
4 daily basis. All responses are typed directly during the interview through Lenovo TAB2 A10-30  
5 tablet. The 24-hour dietary recall is handwritten before being typed to "Tzamert" program <sup>49</sup>, an  
6 Israeli nutrient data program, which enables recording of food intake and calculation of nutrient  
7 intake. In case of any technical difficulties, the questionnaire is completed manually by the  
8 interviewer. A pilot study (n=30) was conducted, after which questionnaires undertook minor  
9 adjustments.

10  
11  
12  
13  
14  
15  
16 Exposure variable: The HEI-2010 score at baseline (T0): Dietary data from the 24-hour dietary recall  
17 questionnaire was entered into the "Tzamert" program. The program uses the nutrient data in the  
18 BINAT program- the Israeli nutrient database which is maintained and updated by the Nutrition  
19 Department of the Ministry of Health. An HEI-2010 score <sup>32 50</sup> will be calculated for T0 and T1  
20 interviews separately. The HEI-2010 has twelve components, nine of which assess adequacy of the  
21 diet, including 1) total fruit; 2) whole fruit; 3) total vegetables; 4) greens and beans; 5) whole grains;  
22 6) dairy; 7) total protein foods; 8) seafood and plant proteins; and 9) fatty acids. The remaining three:  
23 refined grains, sodium, and empty calories assess dietary components that should be consumed in  
24 moderation. For each component, the respondents receive a minimum score of 0 and a maximum  
25 score of 5 or 10 (for perfect adherence to recommendations); intermediate degrees of adherence are  
26 calculated proportionately. Thus, the overall index has a range from 0 (worst) to 100 <sup>32 50</sup>.

#### 35 36 Nutritional status assessments:

37  
38 (1) Dietary recall: The multiple-pass 24-hour dietary recall questionnaire is administrated. The  
39 method was originally developed by the USDA in order to limit the extent of underreporting that  
40 occurs with self-reported food intake <sup>51</sup>. The interviewer uses three distinct passes to gather  
41 information about a subject's food intake during the preceding 24 hours. The first pass is termed  
42 the *quick list*; here the interviewees are asked to recall all they had eaten and drunk in the 24-hour  
43 period that preceded the interview. The second pass is termed the *detailed description*. In this  
44 pass, the interviewees are asked to clarify any foods mentioned in the quick list. The third pass is  
45 termed the *review*. The interviewer reviews the list of foods mentioned and probes for additional  
46 eating occasions and clarifies food portion sizes <sup>51</sup>. In order to assist the interviewees in  
47 identifying food types and quantities during the interview, the interviewers use the "Food and  
48 Food Quantities Guide" which is partially based on the Food Guide of the USDA. The guide  
49 includes detailed questions on foods, as well as many photographs of Israeli foods. In order to  
50  
51  
52  
53  
54  
55  
56  
57  
58  
59  
60

1  
2  
3 facilitate quantification of amounts consumed, the interviewers use, in addition to the guide,  
4 identification aids such as a measuring cup, tablespoon, and teaspoon.

- 5  
6  
7 (2) Food security: Household food security is defined as a situation whereby all household members  
8 have access at all times to a food supply which is adequate for a healthy active life. Food security  
9 is assessed using the short 6-item food security USDA questionnaire <sup>52</sup>.
- 10  
11  
12 (3) Malnutrition risk: Modified Mini Nutritional Assessment-Short Form (MNA-SF) <sup>53</sup>. The 6-item  
13 questionnaire is a nutritional screening tool that assesses malnutrition risk.  
14  
15

16  
17 Primary outcomes:

18  
19 Frailty assessment: Frailty at T0 and T1 is assessed by the *Deficit Index* model <sup>18 45</sup>. Under this  
20 model, frailty is measured by ~40 parameters of symptoms, signs, disease states and disabilities,  
21 collectively referred to as deficits. Adapting the Rockwood index of accumulation of deficits method  
22 <sup>7</sup> with T0 data, a Frailty Index (FI) was developed comprising 33 variables. The FI at T1 will  
23 comprise the same variables as T0 FI and will serve as the outcome measure. The FI is a calculation  
24 of the presence or absence of each deficit as a proportion of the total. Dichotomous items are coded  
25 as 0 if the deficit is absent and as 1 if it is present, while ordinal variables are graded into a score  
26 between 0 and 1 (0 representing no impairment, 0.5 for minor impairment, and 1 for major  
27 impairment). Scores are then summed up and divided by the total number of variables, yielding a  
28 frailty index between 0 and 1, with 1 representing the greatest frailty (a threshold of  $\geq 0.25$  is  
29 typically used to define frailty) <sup>54</sup>. Frailty at T1 is additionally assessed by the *Biological Phenotype*  
30 model <sup>5</sup>. Frailty using this instrument is identified by the presence of three or more of the following  
31 components: 1. Shrinking: weight loss, unintentional, of more than 4.5 Kg, or more than 5% of body  
32 weight, in the previous year; 2. Weakness: grip strength in the lowest 20% (adjusted for sex and  
33 body mass index); 3. Poor endurance and energy: as indicated by self-report of exhaustion; 4.  
34 Slowness: the slowest 20% of the participants in the sample, based on time of a 5-meter walk  
35 (adjusted for sex and standing height); 5. Low physical activity level: a weighted score of  
36 kilocalories expended per week will be calculated based on a Physical Activity Scale for the Elderly  
37 (PASE) questionnaire <sup>55</sup>. The lowest quintile of physical activity will be identified for each gender.  
38  
39  
40  
41  
42  
43  
44  
45  
46  
47  
48  
49  
50

51  
52  
53 Cognitive assessment: Cognitive status is evaluated using the MMSE <sup>26</sup>. The questions are grouped  
54 into seven categories, each representing a different cognitive domain or function: orientation to time  
55 (5 points); orientation to place (5 points); registration of three words (3 points); attention and  
56 calculation (5 points); recall of three words (3 points); language (8 points) and visual construction (1  
57 point) <sup>56</sup>. The MMSE scores (maximum, 30 points) will be education- and age-standardized <sup>47</sup>. Some  
58  
59  
60



1  
2  
3 participants cannot complete test items due to physical disability. The MMSE in these subjects will  
4 be scored out of the items that can be tested<sup>57</sup>. Cognitive impairment will be defined as a score < 24  
5  
6  
7  
8  
9  
10  
11  
12  
13  
14  
15  
16  
17  
18  
19  
20  
21  
22  
23  
24  
25  
26  
27  
28  
29  
30  
31  
32  
33  
34  
35  
36  
37  
38  
39  
40  
41  
42  
43  
44  
45  
46  
47  
48  
49  
50  
51  
52  
53  
54  
55  
56  
57  
58  
59  
60

participants cannot complete test items due to physical disability. The MMSE in these subjects will be scored out of the items that can be tested<sup>57</sup>. Cognitive impairment will be defined as a score < 24<sup>26</sup>. Cognitive decline will be calculated as the MMSE score difference between 2005 and 2017 and will be defined by the 10% of the sample who declined the most (i.e., the 90<sup>th</sup> percentile of decline). MCI will be assessed according to poor performance on MMSE and preserved functional independence<sup>28</sup>. Poor performance on MMSE will be defined by a score of 1.5 standard deviations below the age- and education-specific mean. Preserved functional independence will be defined according to Katz et al. scale of ADL score<sup>27 28</sup>.

### Secondary outcomes:

Health status evaluation: The questionnaire includes data on self-rated health (current status and recent changes) and chronic diseases (e.g., cardiovascular diseases, Parkinson's disease, respiratory diseases, renal disease, cancer, glaucoma and cataract, diabetes mellitus, osteoporosis, hypertension). In addition, the questionnaire includes demographic details, alcohol consumption, and smoking habits information.

Assessment of disabilities: Function is assessed by the Katz scale of Activities of Daily Living<sup>58</sup> based on ability to dress, shower/bathe, sit down and rise from a chair, eat and go to the bathroom. The maximum score is 15, with a score of 5 indicating "no functional limitations," a score of 6-10 indicating some functional limitations, and a score of 11 or more indicating several functional limitations.

Psychosocial assessments: Assessments include depression, perceived social support and health-related quality of life. Depression is evaluated via a 5-item short form of the Yesavage GDS<sup>43</sup>. A score of 2 or higher indicates possible depression. Social support is assessed through the MSPSS<sup>59</sup>, a 12-item questionnaire designed to measure perceptions of support from three sources: family, friends and a significant other (4 items for each source). Answers are given on a 1-7 scale. Weighted scores are calculated by averaging the specific items, each scale (source) individually and the entire questionnaire. A high score represents a high level of perceived social support. Health-related quality of life is evaluated via SF-12<sup>44</sup>, physical (PCS) and mental (MCS) component scores will be constructed from SF-12, using standard (U.S.) and country-specific scoring algorithms.

Drugs: The participants are asked about any medication use on a regular basis (prescription as well as over-the-counter drugs). In the preliminary letter, the participants are asked to prepare their

1  
2  
3 regular medication list. Medications are coded using the ATC (Anatomical Therapeutic and  
4 Chemical) system, developed by the World Health Organization (WHO) <sup>41</sup>.

5  
6  
7  
8 Anthropometric measurements: Include standing height and weight, ulna length (to calculate height,  
9 using recognized formulae), waist and mid-upper arm circumference. Weight measurements are  
10 carried out using an analog scale suitable for weighing up to 130 kg, with accuracy to 0.5 kg. The  
11 scales are placed on an uncarpeted floor and calibrated before weighing. Height is measured using a  
12 spring coil measuring tape. Waist circumference is measured using a flexible tape, with the ability to  
13 measure up to 150 cm, at the narrowest part of the torso, where a "fold" is created when bending  
14 sideways <sup>41</sup>. Mid-upper arm circumference is measured at the mid-point between the tip of the  
15 shoulder and the tip of the elbow (olecranon process and the acromion) using a flexible tape <sup>60</sup>.

16  
17  
18  
19  
20  
21  
22  
23  
24 Blood pressure and pulse measurements: The interviewers conduct blood pressure and pulse  
25 measurements using an electronic monitor. The measurements are carried out according to a protocol  
26 based on recommendations of the American Heart Association <sup>61</sup>. Sitting blood pressure and pulse  
27 are measured in the right arm and is carried out twice, with a minute rest in-between. In case of a  
28 difference of 10% or more between measurements of either systolic or diastolic pressure, a third  
29 measurement is carried out. The final value will be the mean of measurements.

30  
31  
32  
33  
34  
35  
36 Mortality and cause of death: Original participants were linked to the nationwide database of causes  
37 of death (compiled by the Central Bureau of Statistics) via their national identification numbers.  
38 Mortality information is managed by the Ministry of Health. Since 1999, deaths are coded according  
39 to the International Classification of Diseases, Tenth Edition (ICD-10).

#### 40 41 42 43 44 **Quality assurance**

45  
46 Quality assurance is carried out in various ways: (1) A pilot study (n=30) was conducted, after which  
47 questionnaires and research tools were finalized; (2) Interviewer training: A 2-day seminar were  
48 designed and included standard procedures of administrating research questionnaires, performing  
49 anthropometric measurements and handling data in general; (3) All interviews (under interviewee  
50 consent) are recorded; (4) The study coordinator randomly monitor 5-10% of all interviews; (5)  
51 Dietary data quality assurance includes: *a.* a food recall check: time sequence, completeness of  
52 information, matching of the items in the "Quick List" with those in the "Comprehensive List", and  
53  
54  
55  
56  
57  
58  
59  
60 *b.* following data entry into the Tzamert program, testing will be performed for outliers, in

1  
2  
3 appropriate quantities, lack of correlation between meal times and types, and missing quantities and  
4 incorrect coding.  
5  
6  
7  
8

### 9 **Statistical analysis according to specific aims**

10 Analyses will be performed using SAS version 9.4 (SAS Institute Inc, Cary, NC), IBM SPSS version  
11 25 (SPSS, Chicago, IL) and R version 3.4.4 (R Development Core Team). When appropriate, the  
12 sampling approach will be accounted for through weighting.  
13  
14  
15

- 16  
17 **A.** Frailty categories assessed at baseline (T0; frail vs. robust) will serve as the exposure  
18 variable. Baseline characteristics across frailty index categories will be compared by chi-  
19 squared test for categorical variables and student-t-test for continuous variables. Cox  
20 proportional hazards regression models<sup>62</sup> will be fitted to evaluate the hazard ratios for  
21 death. Several adjustment methods will be applied including traditional multivariable  
22 adjustment and propensity score adjustment<sup>63</sup>. The incremental discriminatory ability of  
23 frailty index over demographic and SES variables in predicting death during a 12-year  
24 follow up will be evaluated by the c-statistic. Assessing the c-statistic and its corresponding  
25 standard error from Cox proportional hazards models will be performed with methods  
26 proposed by Harrell et al.<sup>64</sup>.  
27  
28  
29  
30  
31  
32  
33  
34 **B.** Baseline characteristics across HEI categories as measured at T0 will be compared by chi-  
35 squared test for categorical variables and analysis of variance for continuous variables. The  
36 predictive role of nutritional indices in the long-term incidence of frailty, as assessed by two  
37 methods, cognitive decline and other outcomes will be assessed using logistic regression  
38 models<sup>65</sup>. Adjustment will be made for sociodemographic, clinical, and psychosocial  
39 variables, via either multivariable adjustment or propensity score<sup>66</sup>. Of the 1,799  
40 participants in the initial survey, many are no longer able to participate in the T1 interview  
41 (death, loss to follow-up, non-response). Because frailty status could not be assessed among  
42 the latter group, selection bias is introduced<sup>67</sup>. This bias will be addressed through an  
43 adaptation of a marginal structural model, applying inverse probability weights<sup>67 68</sup>.  
44 Accordingly, the probability of original participants to take part in the second interview will  
45 be estimated. Each observation will then be weighted by the reciprocal (i.e., the inverse) of  
46 the predicted probability of participating at T1.  
47  
48  
49  
50  
51  
52  
53  
54  
55  
56  
57  
58  
59  
60

1  
2  
3 C. Nutrient intake will be calculated using the "Tzameret" program, as described previously.  
4 Data of nutrient consumption among current study participants will be compared with  
5 International recommendation, i.e., Dietary Reference Intake (DRI)<sup>69 70</sup>. Prevalence of  
6 malnutrition risk at T1 will be assessed by MNA-SF<sup>53</sup>. Changes in nutrient consumption  
7 will be evaluated by descriptive statistics and paired t-test will be used to evaluate the mean  
8 difference between HEI scores at T0 and T1.  
9  
10  
11  
12  
13  
14  
15

### 16 **Approach to missing data**

17 The distribution of missing values will be examined. Depending on the extent of the problem, several  
18 approaches will be considered. In case of a low rate of missing data, a complete case analysis will be  
19 considered, i.e., removal of subjects where any of the predictor variables are missing. Otherwise, we  
20 will employ multiple imputation methodology<sup>71</sup>. For this purpose, the number of complete  
21 (imputed) datasets will be defined by the following formula:  $(1+\lambda/m)^{-1} = \text{efficiency}$ , where  $\lambda$  is the  
22 fraction of missing information and  $m$  the number of datasets to impute. We will assume an  
23 efficiency of 0.975. Missing values will be replaced by imputed values based on models  
24 incorporating demographic, socioeconomic, psychosocial, and clinical variables. The results of these  
25 datasets will then be combined using Rubin's rules<sup>71</sup>.  
26  
27  
28  
29  
30  
31  
32  
33  
34

### 35 **Estimated statistical power**

36 Among 1,800 initial participants, some 1,115 survived so far. About 600 subjects are expected to be  
37 re-interviewed, assuming a response rate of 55% for T1 interview. Considering frailty prevalence of  
38 over 35% at the estimated average age of 84 years in T1 interview<sup>72</sup>, about 250 frail subjects can be  
39 expected. This sample size is sufficient for detecting an adjusted odds ratio for frailty of  $\leq 0.60$   
40 between the upper and lower HEI score tertiles (significance level at 5% and power of 80%).  
41 Association of this magnitude was previously reported. For example, a previous 6-year follow-up  
42 study showed that adherence to MD diet was associated with lower odds of developing frailty [OR =  
43 0.30 (95% CI: 0.14, 0.66)]<sup>38</sup>.  
44  
45  
46  
47  
48  
49  
50  
51

### 52 **Patient and Public Involvement**

53 Patients and or public are not involved.  
54  
55  
56  
57  
58  
59  
60

### **Ethical aspect**

Ethical approval for the study was obtained from the Helsinki Committee of Chaim Sheba Medical Center at Tel Hashomer and the Ethical Committee of Tel-Aviv University. Potential participants receive a preliminary letter with a description of the study, a request to participate and an announcement that telephone contact would be made in the near future. In addition, the letter provides the telephone number of the research coordinator for further questions. After a minimum of two weeks, potential participants are contacted by telephone in order to set an interview appointment for those who agree to participate. The interview does not involve clinical procedures, and no human biological specimens are collected. Therefore, participants' burden is minimal. Each interviewee is asked to sign an informed consent form.

### **Dissemination**

The findings of the study will be published in peer-reviewed journals and will be presented at national and international conferences.

### **Discussion**

The ILSA sets out to transform a large national survey of older adults with a broad-spectrum data into a cohort study with a specific age-related questionnaire including comprehensive geriatric assessment, evaluation of general health and quality of life. Obtaining data at two points in time, more than a decade apart, will allow us to evaluate long-term changes in older adults population and examine dietary role in the context of healthy aging and adverse clinical outcomes. Participants' estimated current mean age of 84 years old, defined as the "oldest-old", have over past decades been the most rapidly expanding segment of the population in developed countries and also the most susceptible to disease and disability<sup>73</sup>. Only few studies have explicitly examined the concept of robust aging among the oldest-old and investigated its heterogeneity in functioning, cognitive abilities, diet quality, and nutritional status changes. Both frailty and cognitive decline are at the core definition of healthy aging<sup>19 20 74-76</sup> and are highly prevalent in older people; still, as their status varies considerably among older adults, important issues such as how they develop, are they preventable, and can they be detected reliably have yet to be defined. Obviously, our study has several limitations. Of the 1,799 participants in the original survey, many are no longer able to participate in T1 interview (death, loss to follow-up, non-response). Because frailty status and cognitive state could not be assessed among the latter group, selection bias is introduced. This bias will be addressed through applying inverse probability weights based on estimated propensity score. Another limitation is the fact that dietary quality assessment (exposure variable) is based on a single

1  
2  
3 24-hour dietary recall. Although evaluation of the HEI score is suitable for a single 24-hour dietary  
4 recall intake <sup>77 78</sup>, individual diets can vary greatly from day to day. Furthermore, we cannot preclude  
5 that participants may have changed their dietary habits during the follow-up. The 24-hour dietary  
6 recall tool is widely used to assess dietary intake in population studies since 1965 <sup>79</sup>, with studies  
7 indicating its accuracy for estimating energy intake <sup>51 80</sup>. In addition, the multiple-pass 24-hour  
8 dietary recall technique, which is used in our study, manage to limit the extent of underreporting that  
9 occurs with single self-reported food intake <sup>51 81</sup>. Like most similar studies, self-report information  
10 and information form a proxy can lead to misclassification bias that may lead to under or  
11 overestimation of dietary recall, frailty and other measures. Nevertheless, examining the role of diet  
12 quality in the context of healthy aging and adverse clinical outcomes may help to broaden our  
13 knowledge regarding the older adults population, provide a scientific basis on which policymakers  
14 can rely and pave the way for early therapeutic interventions.  
15  
16  
17  
18  
19  
20  
21  
22  
23  
24  
25  
26  
27  
28  
29  
30  
31  
32  
33  
34  
35  
36  
37  
38  
39  
40  
41  
42  
43  
44  
45  
46  
47  
48  
49  
50  
51  
52  
53  
54  
55  
56  
57  
58  
59  
60

## **Reference:**

1. Keehan SP, Lazenby HC, Zezza MA, et al. Age Estimates in the National Health Accounts. *Health Care Financ Rev* 2004;26(2):1-16. [published Online First: 2004/01/01]
2. Bureau USC. Population Projections of the United States by Age, Sex, Race, and Hispanic Origin: 1995 to 2050: U.S. Census Bureau, 2004.
3. Peel NM, McClure RJ, Bartlett HP. Behavioral determinants of healthy aging. *Am J Prev Med* 2005;28(3):298-304. doi: 10.1016/j.amepre.2004.12.002
4. Peel N, Bartlett H, McClure R. Healthy ageing: how is it defined and measured? *Australas J Ageing* 2004;23(3):115-19. doi: 10.1111/j.1741-6612.2004.00035.x
5. Fried LP, Tangen CM, Walston J, et al. Frailty in older adults: Evidence for a phenotype. *J Gerontol a-Biol* 2001;56(3):M146-M56.
6. Ferrucci L, Guralnik JM, Studenski S, et al. Designing randomized, controlled trials aimed at preventing or delaying functional decline and disability in frail, older persons: a consensus report. *Journal of the American Geriatrics Society* 2004;52(4):625-34. doi: 10.1111/j.1532-5415.2004.52174.x [published Online First: 2004/04/07]
7. Mitnitski AB, Mogilner AJ, Rockwood K. Accumulation of deficits as a proxy measure of aging. *ScientificWorldJournal* 2001;1:323-36.
8. Garcia-Gonzalez JJ, Garcia-Pena C, Franco-Marina F, et al. A frailty index to predict the mortality risk in a population of senior Mexican adults. *BMC Geriatr* 2009;9:47. doi: 10.1186/1471-2318-9-471471-2318-9-47 [pii] [published Online First: 2009/11/06]
9. Rockwood K, Howlett SE, MacKnight C, et al. Prevalence, attributes, and outcomes of fitness and frailty in community-dwelling older adults: Report from the Canadian study of health and aging. *J Gerontol A Biol Sci Med Sci* 2004;59(12):1310-17. [published Online First: 2005/02/09]
10. Freiheit EA, Hogan DB, Eliasziw M, et al. Development of a frailty index for patients with coronary artery disease. *Journal of the American Geriatrics Society* 2010;58(8):1526-31. doi: 10.1111/j.1532-5415.2010.02961.x [published Online First: 2010/07/17]
11. Song X, Mitnitski A, Rockwood K. Prevalence and 10-year outcomes of frailty in older adults in relation to deficit accumulation. *Journal of the American Geriatrics Society* 2010;58(4):681-87. doi: 10.1111/j.1532-5415.2010.02764.x [published Online First: 2010/03/30]
12. Lee DH, Buth KJ, Martin BJ, et al. Frail patients are at increased risk for mortality and prolonged institutional care after cardiac surgery. *Circulation* 2010;121(8):973-8. doi: 10.1161/circulationaha.108.841437 [published Online First: 2010/02/18]
13. Rockwood K, Song X, MacKnight C, et al. A global clinical measure of fitness and frailty in elderly people. *CMAJ* 2005;173(5):489-95. doi: 10.1503/cmaj.050051 [published Online First: 2005/09/01]
14. Rodriguez-Manas L, Feart C, Mann G, et al. Searching for an operational definition of frailty: a Delphi method based consensus statement: the frailty operative definition-consensus conference project. *J Gerontol A Biol Sci Med Sci* 2013;68(1):62-7. doi: 10.1093/gerona/gls119 [published Online First: 2012/04/19]



15. Ensrud KE, Ewing SK, Taylor BC, et al. Comparison of 2 frailty indexes for prediction of falls, disability, fractures, and death in older women. *Arch Intern Med* 2008;168(4):382-9. doi: 10.1001/archinternmed.2007.113 [published Online First: 2008/02/27]
16. Hubbard RE, O'Mahony MS, Woodhouse KW. Characterising frailty in the clinical setting--a comparison of different approaches. *Age Ageing* 2009;38(1):115-9. doi: 10.1093/ageing/afn252 [published Online First: 2008/11/15]
17. Sternberg SA, Wershof Schwartz A, Karunanathan S, et al. The identification of frailty: a systematic literature review. *J Am Geriatr Soc* 2011;59(11):2129-38. doi: 10.1111/j.1532-5415.2011.03597.x [published Online First: 2011/11/19]
18. Rockwood K, Andrew M, Mitnitski A. A comparison of two approaches to measuring frailty in elderly people. *J Gerontol A Biol Sci Med Sci* 2007;62(7):738-43. [published Online First: 2007/07/20]
19. Cosco TD, Armstrong JJ, Stephan BCM, et al. Successful Aging and Frailty: Mutually Exclusive Paradigms or Two Ends of a Shared Continuum? *Can Geriatr J* 2015;18(1):35-36. doi: 10.5770/cgj.18.131
20. Woo J, Leung J, Zhang TM. Successful Aging and Frailty: Opposite Sides of the Same Coin? *J Am Med Dir Assoc* 2016;17(9):797-801. doi: DOI 10.1016/j.jamda.2016.04.015
21. Rowe JW, Kahn RL. Successful aging. *Gerontologist* 1997;37(4):433-40. doi: DOI 10.1093/geront/37.4.433
22. Fiocco AJ, Yaffe K. Defining Successful Aging The Importance of Including Cognitive Function Over Time. *Arch Neurol* 2010;67(7):876-80.
23. DeCarli C. Mild cognitive impairment: prevalence, prognosis, aetiology, and treatment. *Lancet Neurol* 2003;2(1):15-21.
24. Gauthier S, Reisberg B, Zaudig M, et al. Mild cognitive impairment. *Lancet* 2006;367(9518):1262-70. doi: Doi 10.1016/S0140-6736(06)68542-5
25. Petersen RC, Doody R, Kurz A, et al. Current concepts in mild cognitive impairment. *Arch Neurol* 2001;58(12):1985-92.
26. Folstein MF, Folstein SE, McHugh PR. "Mini-mental state". A practical method for grading the cognitive state of patients for the clinician. *J Psychiat Res* 1975;12(3):189-98.
27. Petersen RC, Stevens JC, Ganguli M, et al. Practice parameter: early detection of dementia: mild cognitive impairment (an evidence-based review). Report of the Quality Standards Subcommittee of the American Academy of Neurology. *Neurology* 2001;56(9):1133-42.
28. Langa KM, Levine DA. The diagnosis and management of mild cognitive impairment: a clinical review. *Jama* 2014;312(23):2551-61.
29. Ahmed T, Haboubi N. Assessment and management of nutrition in older people and its importance to health. *Clinical interventions in aging* 2010;5:207-16. [published Online First: 2010/08/17]
30. Shahar D, Shai I, Vardi H, et al. Dietary intake and eating patterns of elderly people in Israel: who is at nutritional risk? *European journal of clinical nutrition* 2003;57(1):18-25. doi: 10.1038/sj.ejcn.1601523 [published Online First: 2003/01/28]

- 1  
2  
3 31. Diet, Nutrition, and the Prevention of Chronic Diseases. Geneva, Switzerland: World Heart Organization,  
4 1990.
- 5  
6 32. Patterson RE, Haines PS, Popkin BM. Diet quality index: capturing a multidimensional behavior. *J Am Diet*  
7 *Assoc* 1994;94(1):57-64. doi: 0002-8223(94)92042-7 [pii] [published Online First: 1994/01/01]
- 8  
9 33. Guenther PM, Casavale KO, Reedy J, et al. Update of the Healthy Eating Index: HEI-2010. *J Acad Nutr Diet*  
10 2013;113(4):569-80. doi: 10.1016/j.jand.2012.12.016
- 11  
12 34. Deckelbaum RJ, Fisher EA, Winston M, et al. Summary of a scientific conference on preventive nutrition:  
13 pediatrics to geriatrics. *Circulation* 1999;100(4):450-6.
- 14  
15 35. Bollwein J, Diekmann R, Kaiser MJ, et al. Distribution but not amount of protein intake is associated with  
16 frailty: a cross-sectional investigation in the region of Nurnberg. *Nutr J* 2013;12 doi: Artn  
17 10910.1186/1475-2891-12-109
- 18  
19 36. Willett WC, Sacks F, Trichopoulos A, et al. Mediterranean Diet Pyramid - a Cultural Model for Healthy  
20 Eating. *Am J Clin Nutr* 1995;61(6):1402s-06s.
- 21  
22 37. Leon-Munoz LM, Guallar-Castillon P, Lopez-Garcia E, et al. Mediterranean Diet and Risk of Frailty in  
23 Community-Dwelling Older Adults. *J Am Med Dir Assoc* 2014;15(12):899-903. doi:  
24 10.1016/j.jamda.2014.06.013
- 25  
26 38. Talegawkar SA, Bandinelli S, Bandeen-Roche K, et al. A Higher Adherence to a Mediterranean-Style Diet Is  
27 Inversely Associated with the Development of Frailty in Community-Dwelling Elderly Men and  
28 Women. *J Nutr* 2012;142(12):2161-66. doi: 10.3945/jn.112.165498
- 29  
30 39. Scarmeas N, Stern Y, Mayeux R, et al. Mediterranean diet, Alzheimer disease, and vascular mediation.  
31 *Arch Neurol* 2006;63(12):1709-17.
- 32  
33 40. Luchsinger JA, Mayeux R. Dietary factors and Alzheimer's disease. *Lancet Neurol* 2004;3(10):579-87.
- 34  
35 41. ICDC. Mabat Zahav National Health and Nutrition Survey age 65 and over 2005-6.  
36 [https://www.health.gov.il/PublicationsFiles/Mabat\\_2005-2006-a.pdf](https://www.health.gov.il/PublicationsFiles/Mabat_2005-2006-a.pdf), 2011.
- 37  
38 42. Zimet GD, Powell SS, Farley GK, et al. Psychometric Characteristics of the Multidimensional Scale of  
39 Perceived Social Support. *J Pers Assess* 1990;55(3-4):610-17. doi: DOI  
40 10.1207/s15327752jpa5503&4\_17
- 41  
42 43. Hoyl MT, Alessi CA, Harker JO, et al. Development and testing of a five-item version of the Geriatric  
43 Depression Scale. *J Am Geriatr Soc* 1999;47(7):873-78.
- 44  
45 44. Ware JE, Kosinski M, Keller SD. A 12-item short-form health survey - Construction of scales and  
46 preliminary tests of reliability and validity. *Med Care* 1996;34(3):220-33. doi: Doi 10.1097/00005650-  
47 199603000-00003
- 48  
49 45. Mitnitski AB, Mogilner AJ, Rockwood K. Accumulation of deficits as a proxy measure of aging.  
50 *ScientificWorldJournal* 2001;1:323-36. doi: 10.1100/tsw.2001.58 [published Online First:  
51 2003/06/14]
- 52  
53 46. Health IMo. [Available from:  
54 [https://www.health.gov.il/UnitsOffice/ICDC/mabat/Pages/Mabat\\_Gold.aspx](https://www.health.gov.il/UnitsOffice/ICDC/mabat/Pages/Mabat_Gold.aspx).

- 1  
2  
3 47. Crum RM, Anthony JC, Bassett SS, et al. Population-Based Norms for the Mini-Mental-State-Examination  
4 by Age and Educational-Level. *Jama-J Am Med Assoc* 1993;269(18):2386-91. doi: DOI  
5 10.1001/jama.269.18.2386  
6  
7  
8 48. KoBotoolbox software [Available from: <http://www.kobotoolbox.org/>.  
9  
10 49. Tzamert software: Nutrition Department of the Ministry of Health [Available from:  
11 <https://www.health.gov.il/Subjects/FoodAndNutrition/Nutrition/professionals/Pages/Tzameret.aspx>  
12  
13 50. Guenther PM, Casavale KO, Reedy J, et al. Update of the Healthy Eating Index: HEI-2010. *Journal of the*  
14 *Academy of Nutrition and Dietetics* 2013;113(4):569-80. doi: 10.1016/j.jand.2012.12.016 [published  
15 Online First: 2013/02/19]  
16  
17 51. Johnson RK, Driscoll P, Goran MI. Comparison of multiple-pass 24-hour recall estimates of energy intake  
18 with total energy expenditure determined by the doubly labeled water method in young children. *J*  
19 *Am Diet Assoc* 1996;96(11):1140-4.  
20  
21 52. Blumberg SJ, Bialostosky K, Hamilton WL, et al. The effectiveness of a short form of the Household Food  
22 Security Scale. *Am J Public Health* 1999;89(8):1231-4. [published Online First: 1999/08/05]  
23  
24 53. Bauer JM, Kaiser MJ, Anthony P, et al. The Mini Nutritional Assessment--its history, today's practice, and  
25 future perspectives. *Nutr Clin Pract* 2008;23(4):388-96. doi: 10.1177/088453360832113223/4/388  
26 [pii] [published Online First: 2008/08/07]  
27  
28 54. Myers V, Drory Y, Gerber Y, et al. Clinical relevance of frailty trajectory post myocardial infarction. *Eur J*  
29 *Prev Cardiol* 2014;21(6):758-66.  
30  
31 55. Washburn RA, Smith KW, Jette AM, et al. The Physical Activity Scale for the Elderly (PASE): development  
32 and evaluation. *J Clin Epidemiol* 1993;46(2):153-62.  
33  
34 56. Tombaugh TN, McIntyre NJ. The mini-mental state examination: a comprehensive review. *J Am Geriatr*  
35 *Soc* 1992;40(9):922-35.  
36  
37 57. Vertesi A, Lever JA, Molloy DW, et al. Standardized mini-mental state examination - Use and  
38 interpretation. *Can Fam Physician* 2001;47:2018-23.  
39  
40 58. Katz S, Downs TD, Cash HR, et al. Progress in development of the index of ADL. *Gerontologist*  
41 1970;10(1):20-30. [published Online First: 1970/01/01]  
42  
43 59. Zimet GD, Dahlem NW, Zimet SG, et al. The Multidimensional Scale of Perceived Social Support. *J Pers*  
44 *Assess* 1988;52(1):30-41. doi: DOI 10.1207/s15327752jpa5201\_2  
45  
46 60. Tsai AC, Chang T-L, Yang T-W, et al. A modified mini nutritional assessment without BMI predicts  
47 nsutritional status of community-living elderly in Taiwan. *The journal of nutrition, health & aging*  
48 2010;14(3):183-89.  
49  
50 61. Smith L. New AHA recommendations for blood pressure measurement. *Am Fam Physician*  
51 2005;72(7):1391-+.  
52  
53 62. Cox DR. Regression Models and Life-Tables. *J R Stat Soc B* 1972;34(2):187-+.  
54  
55  
56  
57  
58  
59  
60

- 1  
2  
3 63. Austin PC. An Introduction to Propensity Score Methods for Reducing the Effects of Confounding in  
4 Observational Studies. *Multivar Behav Res* 2011;46(3):399-424. doi: Pii  
5 93847000010.1080/00273171.2011.568786  
6
- 7 64. Harrell FE, Lee KL, Mark DB. Multivariable prognostic models: Issues in developing models, evaluating  
8 assumptions and adequacy, and measuring and reducing errors. *Stat Med* 1996;15(4):361-87. doi:  
9 Doi 10.1002/(Sici)1097-0258(19960229)15:4<361::Aid-Sim168>3.0.Co;2-4  
10
- 11 65. Dominguez-Almendros S, Benitez-Parejo N, Gonzalez-Ramirez AR. Logistic Regression Models. *Allergol*  
12 *Immunopath* 2011;39(5):295-305. doi: 10.1016/j.aller.2011.05.002  
13  
14
- 15 66. Rosenbaum PR, Rubin DB. The Central Role of the Propensity Score in Observational Studies for Causal  
16 Effects. *Biometrika* 1983;70(1):41-55. doi: DOI 10.1093/biomet/70.1.41  
17
- 18 67. Hernan MA, Hernandez-Diaz S, Robins JM. A structural approach to selection bias. *Epidemiology*  
19 2004;15(5):615-25. doi: 10.1097/01.ede.0000135174.63482.43  
20
- 21 68. Robins JM, Hernan MA, Brumback B. Marginal structural models and causal inference in epidemiology.  
22 *Epidemiology* 2000;11(5):550-60. doi: Doi 10.1097/00001648-200009000-00011  
23  
24
- 25 69. Trumbo P, Schlicker S, Yates AA, et al. Dietary reference intakes for energy, carbohydrate, fiber, fat, fatty  
26 acids, cholesterol, protein and amino acids. *J Am Diet Assoc* 2002;102(11):1621-30. doi: Doi  
27 10.1016/S0002-8223(02)90346-9  
28
- 29 70. Trumbo P, Yates AA, Schlicker S, et al. Dietary reference intakes: Vitamin A, vitamin K, arsenic, boron,  
30 chromium, copper, iodine, iron, manganese, molybdenum, nickel, silicon, vanadium, and zinc. *J Am*  
31 *Diet Assoc* 2001;101(3):294-301. doi: Doi 10.1016/S0002-8223(01)00078-5  
32  
33
- 34 71. Rubin DB. Multiple imputation for nonresponse in surveys: John Wiley & Sons 2004.  
35
- 36 72. Collard RM, Boter H, Schoevers RA, et al. Prevalence of frailty in community-dwelling older persons: a  
37 systematic review. *J Am Geriatr Soc* 2012;60(8):1487-92. doi: 10.1111/j.1532-5415.2012.04054.x  
38 [published Online First: 2012/08/14]  
39
- 40 73. Fried LP. Epidemiology of aging. *Epidemiol Rev* 2000;22(1):95-106.  
41  
42
- 43 74. Rosado-Artalejo C, Carnicero JA, Losa-Reyna J, et al. Cognitive Performance across 3 Frailty Phenotypes:  
44 Toledo Study for Healthy Aging. *J Am Med Dir Assoc* 2017;18(9):785-90. doi:  
45 10.1016/j.jamda.2017.04.008  
46
- 47 75. Shlisky J, Bloom DE, Beaudreault AR, et al. Nutritional Considerations for Healthy Aging and Reduction in  
48 Age-Related Chronic Disease. *Adv Nutr* 2017;8(1):17-26. doi: 10.3945/an.116.013474  
49
- 50 76. Allerhand M, Gale CR, Deary IJ. The Dynamic Relationship Between Cognitive Function and Positive Well-  
51 Being in Older People: A Prospective Study Using the English Longitudinal Study of Aging. *Psychol*  
52 *Aging* 2014;29(2):306-18. doi: 10.1037/a0036551  
53  
54
- 55 77. Guenther PM, Reedy J, Krebs-Smith SM, et al. Evaluation of the Healthy Eating Index-2005. *J Am Diet*  
56 *Assoc* 2008;108(11):1854-64. doi: 10.1016/j.jada.2008.08.011  
57  
58  
59  
60

- 1  
2  
3 78. Guenther PM, Kirkpatrick SI, Reedy J, et al. The Healthy Eating Index-2010 Is a Valid and Reliable Measure  
4 of Diet Quality According to the 2010 Dietary Guidelines for Americans. *The Journal of Nutrition*  
5 2014;144(3):399-407. doi: 10.3945/jn.113.183079  
6  
7  
8 79. Zimmerman TP, Hull SG, McNutt S, et al. Challenges in converting an interviewer-administered food  
9 probe database to self-administration in the National Cancer Institute automated self-administered  
10 24-hour recall (ASA24). *J Food Compos Anal* 2009;22:S48-S51. doi: 10.1016/j.jfca.2009.02.003  
11  
12 80. Jonnalagadda SS, Mitchell DC, Smiciklas-Wright H, et al. Accuracy of energy intake data estimated by a  
13 multiple-pass, 24-hour dietary recall technique. *J Am Diet Assoc* 2000;100(3):303-11. doi: Doi  
14 10.1016/S0002-8223(00)00095-X  
15  
16 81. Raper N, Perloff B, Ingwersen L, et al. An overview of USDA's dietary intake data system. *J Food Compos*  
17 *Anal* 2004;17(3-4):545-55. doi: 10.1016/j.jfca.2004.02.013  
18  
19  
20  
21

### **Figure legends:**

22  
23  
24 Figure 1: Study design sketch. <sup>1</sup>Mini Mental State Examination; <sup>2</sup>General Health Questionnaire;  
25  
26 <sup>3</sup>Activities of Daily Living; <sup>4</sup>Mini Nutritional Assessment-Short Form; <sup>5</sup>Healthy Eating Index;  
27  
28 <sup>6</sup>Geriatric Depression Scale; <sup>7</sup>Short Form of health-related-quality of life.  
29

30 Figure 2: Sample size flow chart.  
31  
32  
33  
34

### **Footnotes**

#### **Authors' contributions**

35  
36  
37  
38  
39 AG, study coordinator of the ILSA, drafted the manuscript, assisted in the conception of the study  
40 and led field activities and study monitoring; UG, co-investigator for the ILSA, conceived of the  
41 study concept and design and supervised the study; T Shohat, co-investigator of the ILSA and  
42 physician-in-charge of the study; LKB, principal investigator of MABAT ZAHAV survey; T  
43 Shimony, coordinator of MABAT ZAHAV survey; YG, principal investigator of the ILSA,  
44 conceived of the study concept and design and co-drafted the manuscript. All authors revised,  
45 reviewed and approved the final paper.  
46  
47  
48  
49  
50  
51  
52  
53  
54  
55  
56  
57  
58  
59  
60

### **Funding**

This study is supported by grant no.3-12787 from the Chief Scientist Office, Ministry of Health (principal investigator, YG), and The Bircher-Benner Foundation, Tel Aviv University (principal investigator, YG).

### **Competing interests**

The authors declare that they have no competing interests.

### **Acknowledgments**

We are indebted to all those who agree to participate in the study for their cooperation and patience answering our comprehensive questionnaire and their willingness to let us into their homes. We are grateful for our professional and dedicated study team: Osnat Fried, B.Sc., Michal Weber, B.Sc., RD, Rana Younis, B.Sc., RD and Polina Pokrass, B.A, RN. This work was performed in partial fulfillment of the requirements for a Ph.D. degree of Abigail Goshen, Sackler Faculty of Medicine, Tel Aviv University, Israel.

Review only

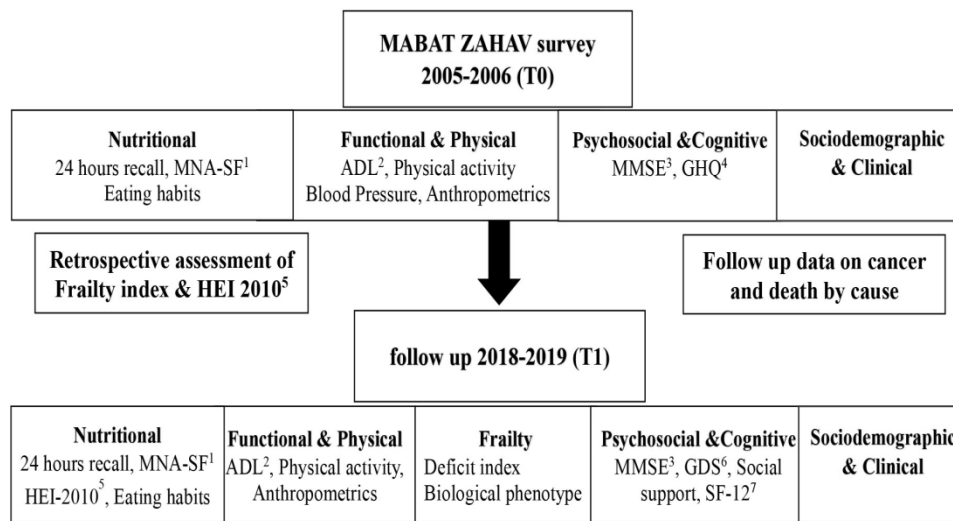

25 Figure 1: Research design sketch.<sup>1</sup>Mini Mental State Examination; <sup>2</sup>General Health Questionnaire; <sup>3</sup>Activities  
26 of Daily Living; <sup>4</sup>Mini Nutritional Assessment– Short Form; <sup>5</sup>Healthy Eating Index; <sup>6</sup>Geriatric Depression  
27 Scale; <sup>7</sup>Short Form of health-related-quality of life.  
28

29 162x91mm (300 x 300 DPI)



1  
2  
3  
4  
5  
6  
7  
8  
9  
10  
11  
12  
13  
14  
15  
16  
17  
18  
19  
20  
21  
22  
23  
24  
25  
26  
27  
28  
29  
30  
31  
32  
33  
34  
35  
36  
37  
38  
39  
40  
41  
42  
43  
44  
45  
46  
47  
48  
49  
50  
51  
52  
53  
54  
55  
56  
57  
58  
59  
60



Figure 2. Sample size flow chart.

91x111mm (300 x 300 DPI)

# BMJ Open

## Diet Quality in Relation to Healthy Aging. The Israeli Longitudinal Study on Aging (ILSA): Study Protocol.

|                                 |                                                                                                                                                                                                                                                                                                                                                                                                                                                                                                                                                                              |
|---------------------------------|------------------------------------------------------------------------------------------------------------------------------------------------------------------------------------------------------------------------------------------------------------------------------------------------------------------------------------------------------------------------------------------------------------------------------------------------------------------------------------------------------------------------------------------------------------------------------|
| Journal:                        | <i>BMJ Open</i>                                                                                                                                                                                                                                                                                                                                                                                                                                                                                                                                                              |
| Manuscript ID                   | bmjopen-2018-024673.R3                                                                                                                                                                                                                                                                                                                                                                                                                                                                                                                                                       |
| Article Type:                   | Protocol                                                                                                                                                                                                                                                                                                                                                                                                                                                                                                                                                                     |
| Date Submitted by the Author:   | 21-Feb-2019                                                                                                                                                                                                                                                                                                                                                                                                                                                                                                                                                                  |
| Complete List of Authors:       | Goshen, Abigail; Tel Aviv University, Epidemiology and Preventive Medicine<br>Goldbourt, Uri; Tel Aviv University, Epidemiology and Preventive Medicine<br>Shohat, Tamar; Tel Aviv University, Epidemiology and Preventive Medicine; State of Israel Ministry of Health, Israel Center for Disease Control<br>Shimony, Tal ; State of Israel Ministry of Health, Israel Center for Disease Control<br>Keinan-Boker, Lital; State of Israel Ministry of Health, Israel Center for Disease Control<br>Gerber, Yariv; Tel Aviv University, Epidemiology and Preventive Medicine |
| <b>Primary Subject Heading</b>: | Geriatric medicine                                                                                                                                                                                                                                                                                                                                                                                                                                                                                                                                                           |
| Secondary Subject Heading:      | Nutrition and metabolism, Epidemiology                                                                                                                                                                                                                                                                                                                                                                                                                                                                                                                                       |
| Keywords:                       | diet quality, older adults, healthy aging, longitudinal studies, EPIDEMIOLOGY                                                                                                                                                                                                                                                                                                                                                                                                                                                                                                |
|                                 |                                                                                                                                                                                                                                                                                                                                                                                                                                                                                                                                                                              |

SCHOLARONE™  
Manuscripts

# Diet Quality in Relation to Healthy Aging.

## The Israeli Longitudinal Study on Aging (ILSA): Study Protocol.

Abigail Goshen<sup>1</sup>, Uri Goldbourt<sup>1</sup>, Tamar Shohat<sup>1,2</sup>, Tal Shimony<sup>2</sup>, Lital Keinan-Boker<sup>2</sup>, Yariv Gerber<sup>1</sup>

1. Dept. of Epidemiology and Preventive Medicine, School of Public Health, Sackler Faculty of Medicine, Tel Aviv University, Ramat Aviv, Tel Aviv, 6997801, Israel.
2. Israel Center for Disease Control, Israel Ministry of Health, Ramat Gan, Israel.

Abigail Goshen: [abigail1@mail.tau.ac.il](mailto:abigail1@mail.tau.ac.il)

Uri Goldbourt: [goldbu1@tauex.tau.ac.il](mailto:goldbu1@tauex.tau.ac.il)

Tamar Shohat: [tamar.shohat2@moh.gov.il](mailto:tamar.shohat2@moh.gov.il)

Tal Shimony: [Tal.Shimony@moh.gov.il](mailto:Tal.Shimony@moh.gov.il)

Lital Keinan-Boker: [Lital.Keinan2@moh.gov.il](mailto:Lital.Keinan2@moh.gov.il)

Yariv Gerber: [yarivgerber@gmail.com](mailto:yarivgerber@gmail.com)

**Corresponding author:** Yariv Gerber, PhD, Department of Epidemiology and Preventive Medicine, School of Public Health, Sackler Faculty of Medicine, Tel Aviv University, Ramat Aviv, Tel Aviv, 6997801, Israel. Email: [yarivgerber@gmail.com](mailto:yarivgerber@gmail.com)

# Diet Quality in Relation to Healthy Aging.

## The Israeli Longitudinal Study on Aging (ILSA): Study Protocol.

**Introduction:** Population aging is accelerating rapidly in Israel as well as worldwide, necessitating adaptation of the health care system and consideration of new approaches that serve the specific needs of older adults. In addition to cognitive function, frailty is one of the most challenging expressions of physical and mental aging, a multidimensional syndrome of increased vulnerability. Several studies have shown that low intake of certain micronutrients and protein is associated with higher risk of frailty and cognitive impairment. However, whether global diet quality is involved in the etiology of the latter outcomes is unclear.

**Methods and analysis:** We are conducting, among older adult subjects who took part in "MABAT ZAHAV" (Israeli National Health and Nutrition Survey of Older Adults) in 2005-2006 (T0, N=1,852) an extensive follow-up interview (T1) that includes comprehensive geriatric assessment and evaluation of general health and quality of life. Diet quality is evaluated using the Healthy Eating Index (HEI) 2010, based on 24-hour diet recall measured at T0 and T1. Frailty is assessed using two different approaches: the phenotype framework and the accumulation of deficits model. Cognitive function is assessed by Mini Mental State Examination (MMSE) and cognitive decline by the difference between repeated MMSE measurements. Different analytic methods will be applied to evaluate the role of diet quality in development of frailty and cognitive decline with inverse probability weighting used to minimize attrition bias. About 600 subjects are expected to be interviewed between May 2017 and December 2019.

**Ethics and dissemination:** Ethical approval was obtained from the Helsinki Committee of Sheba Medical Center, Tel Hashomer, Israel and the Ethical Committee of Tel-Aviv University. All participants sign an informed consent form. The findings of the study will be published in peer-reviewed journals.

**Keywords:** diet quality; epidemiology; older adults; healthy aging; longitudinal studies

## Strengths and limitations of this study

- The study transforms a large national survey of older adults with a broad-spectrum data into a cohort study with a specific age-related questionnaire including comprehensive geriatric assessment.
- Obtaining data at two points in time, more than a decade apart, will allow us to evaluate long-term changes in older adult population and examine adverse clinical outcomes.
- Selection bias due to death, loss to follow-up and non-response.
- Misclassification bias due to self-report data and nutritional assessment which is based on a single 24-hour dietary recall.

## Background

### Healthy aging

Population aging is accelerating rapidly in Israel as well as worldwide, necessitating adaptation of the health care systems and consideration of new approaches that serve the specific needs of older adults <sup>1</sup>. According to current forecasts, the percentage of persons 65 years and older will increase from 8.5% in 2015 to 19.0% by 2030 <sup>2</sup>. The concept of healthy aging is generally described as optimizing opportunities for improving and preserving health and physical, social, and mental health; and enhancing successful life-course transitions <sup>3</sup>. While this definition depicts healthy aging (also termed successful aging) as a complex process of adaptation to changes across the lifespan, the concept needs to be looked at in terms of a measurable outcome that can be empirically validated <sup>4</sup>. Despite the differences in healthy aging definitions, there is some consensus in the studies that ‘successful ager’ outcome should measure function in domains of cognitive, physical and mental well-being <sup>4</sup>. In our study, we intend to transform a large national survey of older adults into a cohort study with specific age-related questionnaires including general health, functional status, quality of life, social support, depression and cognitive function. Healthy aging will be assessed by various measurements, with emphasis on frailty state and cognitive function. The predictive role of diet quality in the development of the latter outcomes will be evaluated, as described in detail in the following sections.

## Frailty

Frailty is recognized as an important medical syndrome of decreased reserve and resistance to stressors, resulting from cumulative declines across multiple physiologic systems<sup>5</sup>. Frail older persons are at high risk of accelerated physical and cognitive functional decline, disability, and death<sup>6</sup>. The concept of frailty adopts an integrative approach which represents general properties of aging and health rather than particular functional deficiency or decline<sup>7</sup>.

Assessment of frailty has implications both for the individual and on society at large, forecasting healthcare use<sup>8,9</sup> and providing opportunities for preventive intervention<sup>10,11</sup>, thus making it a key issue in chronic disease management and healthy aging<sup>12,13</sup>.

Methods to measure frailty vary throughout the literature<sup>14-17</sup>, with two principal models of frailty emerging: **(1)** The Fried and colleagues' *Biological Phenotype*<sup>5</sup> framework, which conceptualizes frailty as a biologic syndrome characterized by a decline in overall function and loss of resistance to stressors. This model is comprised of five physical indicators including low physical activity, weak grip strength, slow walking speed, exhaustion, and unintentional weight loss. **(2)** The Rockwood and colleagues' *Accumulation of Deficits Index*<sup>18</sup>, which defines frailty as the cumulative effect of individual deficits. Under this model, frailty is measured by ~40 parameters of disease states, functional status, cognitive function, and psychosocial status, collectively referred to as deficits. The index is a calculation of the presence or absence of each deficit as a proportion of total<sup>8</sup>. Frailty and successful aging models share common aspects of aging<sup>19</sup>. Frailty is recognized as an independent determinant of successful aging, supporting the idea that successful agers might be nonfrail individuals<sup>19,20</sup>.

## Cognitive function

Another important aspect of successful aging is the maintenance of cognitive function<sup>21</sup>. Cognitive function is a predictor of independence and quality of life<sup>22</sup>. Cognitive function assessed repeatedly is important because it is possible for an elderly person to have a normal cognitive score that still represents a significant decline for that individual. Mild cognitive impairment (MCI) is a syndrome that is currently thought of as a transition phase between healthy cognitive aging and dementia<sup>23</sup>. MCI is defined as cognitive decline greater than expected for an individual's age and education level but that does not interfere notably with Activities of Daily Life (ADL)<sup>24</sup>. The estimated prevalence of MCI in population-based studies ranges from 10% to 20% in people older than 65 years of age. Clinical studies indicate that older adults with MCI will progress to Alzheimer's Disease (AD) at a rate of 10% to 15% per year, compared with healthy control subjects who convert at a rate of 1% to 2% per year<sup>25</sup>, making it an area of intense interest for theoretical and practical reasons. A widely

1  
2  
3 recognized instrument for detection of cognitive impairment is the Mini-Mental State Examination  
4 (MMSE)<sup>26 27</sup>. The MMSE consists of thirty questions and has a maximum score of 30 points. MCI  
5 will be assessed according to poor performance on MMSE (i.e., a score of 1.5 standard deviations  
6 below the age- and education-specific mean) and preserved independence in functional abilities<sup>27 28</sup>.  
7  
8  
9

## 10 11 **Nutrition**

12 Nutrition is an important element that affects and is affected by the aging process<sup>29 30</sup>. Malnutrition is  
13 highly prevalent among older adults and associated with a general decline in physical and mental  
14 functioning, higher hospitalization rate and increased mortality<sup>29</sup>. Eating patterns of various cultures  
15 around the world have been associated with risk for chronic diseases<sup>31</sup>. However, examining the  
16 intake of a single nutrient or food group does not account for the complexity of dietary intake, as food  
17 and nutrients are not eaten in isolation. Consequently, indices of dietary quality, patterns, and variety  
18 are increasingly used by nutritional epidemiologists<sup>32</sup>. The Healthy Eating Index-2010 (HEI-2010)<sup>33</sup>  
19 is such an index, originally released in 1995 and then updated in 2010 by the US Department of  
20 Agriculture (USDA) as a measure of diet quality. The concept of diet quality as a determinant of  
21 frailty development is not new but whether it is a predictor or consequence of frailty has not been  
22 investigated adequately<sup>34</sup>. Several studies have shown that low intake of certain micronutrients and  
23 protein is associated with a higher risk of developing frailty. However, very few studies have  
24 assessed the effect of overall diet quality on frailty<sup>35</sup>. Two studies have suggested that increasing  
25 adherence to Mediterranean diet (MD, a diet characterized by high intake of fish, vegetables,  
26 legumes, fruits, cereals, and unsaturated fatty acids<sup>36</sup>) is associated with decreasing risk of frailty  
27 among community-dwelling older adults in Spain and Italy<sup>37 38</sup>. In addition, it was recently  
28 demonstrated that higher adherence to MD is associated with lower AD risk<sup>39 40</sup>. However, in most  
29 studies the MD score was defined from sample-specific scores; thus, only the relative but not the  
30 absolute effect of MD was assessed, and the results of these studies are difficult to compare across  
31 populations.  
32  
33  
34  
35  
36  
37  
38  
39  
40  
41  
42  
43  
44  
45  
46  
47  
48  
49  
50  
51  
52  
53  
54  
55  
56  
57  
58  
59  
60



## **Research Objective**

### **General objective**

Investigate the relationship between diet quality and healthy aging.

### **Specific aims**

**A.** Develop a frailty index based on "Mabat Zahav" data (T0) and evaluate its prevalence and association with subsequent survival.

**B.** Examine the predictive role of diet quality in development of frailty, cognitive changes and other healthy aging aspects among study participants.

**C.** Investigate long-term changes of dietary consumption and nutritional status among study participants.

### **Hypothesis**

We hypothesize that diet quality in older adults is predictive of successful aging as measured by a variety of clinical outcomes.

## **Methods/Design**

### **Research design**

The study employs a cohort study design. It constitutes the second interview of Mabat Zahav study<sup>41</sup>. The First National Health and Nutrition Survey of Older Adults Aged 65 and Over in Israel ("Mabat Zahav") was carried out in 2005-2006 by the Israel Center for Disease Control (ICDC) and the Nutrition Department of the Israel Ministry of Health. The data collected on the survey included information regarding health and nutrition status, health behaviors (physical activity, alcohol consumption, medication use, use of nutrition supplements), knowledge and attitudes regarding nutrition, and utilization of health services. The survey framework and population is further described in the following section. The current study questionnaire (T1) duplicates most parts of the original (T0) interview (Fig. 1). In addition, measurements pertaining to frailty status and cognitive function are performed, as well as psychosocial assessments including the multidimensional scale of perceived social support (MSPSS)<sup>42</sup>, geriatric depression scale (GDS)<sup>43</sup> and the short form of health-related-quality of life (SF-12)<sup>44</sup>. The added psychosocial questionnaires are in order to enable a more comprehensive analysis of the concept of healthy aging and well-being. The HEI-2010, a measure of diet quality retrospectively assessed at T0, will serve as the exposure variable and be assessed prospectively at T1 in order to evaluate general changes in diet quality and composition.

1  
2  
3 Frailty at T0 is retrospectively assessed through the Rockwood and colleagues' Deficit Index<sup>18</sup>. The  
4 index will be developed according to published criteria in order to identify frail participants at study  
5 entry. Frailty will be assessed prospectively at T1 by both the Deficit Index and the Fried and  
6 colleagues' Biological Phenotype framework<sup>5</sup>. Cognitive changes and MCI will be assessed  
7 prospectively. Mortality follow up will be conducted among T0 participants through linkage to the  
8 nationwide database of causes of death (compiled by the Central Bureau of Statistics) via their  
9 national identification numbers.

### 15 16 **"Mabat Zahav" survey – study population**

17 The Mabat Zahav survey population was a random sample of Israeli citizens age  $\geq 65$  years old. The  
18 survey included 1,852 community-dwelling participants (1,536 Jews and 316 Arabs) residing in  
19 Israel, who had lived in the country for at least one year in urban and rural settlements with more  
20 than 20,000 residents. Exclusion criteria of Mabat Zahav survey included: significant cognitive  
21 reduction (MMSE $<17$ ) and hospitalization at the time of the study. Survey methods included a  
22 personal interview in the interviewees' homes or sheltered accommodation using a structured  
23 questionnaire.

24  
25 Sampling frame: Adults aged 65 and over insured by the two major HMO in Israel, Clalit Health  
26 Services and Maccabi Health Services, representing 86.3% of all of the elderly in Israel, were  
27 sampled. Oversampling was carried out in the Arab population, because of the small percentage of  
28 elderly in the Arab population (6.3%), in order to ensure a sample large enough for statistical  
29 analyses and comparisons with the Jewish sector. The overall sample size target was 1,800  
30 participants, 1,500 Jews, and 300 Arabs.

31  
32 Sampling method: Lists of insured older adults from each of the two HMO were combined and  
33 divided into population groups (Jews and Arabs). Sampling was carried out in two stages due to low  
34 response rate at the first stage, in order to meet the sample size target. First stage: 5,100 people were  
35 randomly sampled, with 4,250 from the Jewish list and 850 from the Arab list. Interviewing of  
36 individuals from the first sample commenced in July 2005. A total of 1,081 individuals were  
37 interviewed, of which 1,051 questionnaires met inclusion criteria (909 Jews and 142 Arabs). Second  
38 stage: An additional sample was drawn in January 2006, including 4,250 Jews and 2,500 Arabs,  
39 since the initial lists were exhausted. A total of 771 individuals were interviewed, of which 748  
40 questionnaires met inclusion criteria (590 Jews and 158 Arabs). The interviews were held in multiple  
41 languages, and the questionnaires were translated accordingly: 1277 (69%) in Hebrew, 316 (17%) in  
42 Arabic, 257 (14%) in Russian and 2 in English<sup>41</sup>. All data collected are available online at the  
43 ministry of health government web site<sup>45</sup>.

### Exclusion criterion in current research stage (T1):

Significant cognitive reduction as measured by a MMSE score of less than 17<sup>26 46</sup> or inability to communicate.

### Sample size

Among T0 initial participants (1,852), 1,799 (1,499 Jews and 300 Arabs) questionnaires were included in the final survey analysis. Forty-six participants (29 Jews and 17 Arabs) had a MMSE score of less than 17 (after adjustment for age and education), and seven questionnaires were only partially completed and therefore excluded from the statistical analysis. According to the mortality registry of the Ministry of Health, 1,115 participants were alive in February 2017. We assume that 25% of candidates will be unable to participate due to either exclusion criteria or severe medical condition and another 20% could not be contacted due to address or telephone number changes. We expect a response rate of 55%-60% among the remaining candidates for T1 interview, and so about 600 subjects are expected to be re-interviewed (Fig.2). Our efforts to maximize recruitment include the following steps:

Disconnected phone numbers and no response: **a.** Locating address changes via the Ministry of Interior database. **b.** Searching by the Israeli non-commercial telephone directory according to city of residence and family name only (in case of incorrect street name). **c.** Conducting ten attempts to contact each non-respondent.

Refusal: We are trying to encourage cooperation by **a.** Offering to conduct interviews 7 days a week, morning times and afternoons. **b.** Offering to divide the interview into two separate times, in case the length of the interview is a concern for the participant.

### Data collection

A personal interview is conducted in the interviewees' homes by trained interviewers using a structured questionnaire. Anthropometric measurements are performed using standardized protocols as described in a subsequent section. Interviews are conducted in Hebrew, Arabic or Russian. Estimated time of an interview is an hour and a half. In case the participant is unable to complete the questionnaire by himself/herself, but still meets inclusion criteria, information from a proxy is obtained regarding dietary intake, chronic diseases, ADL, sociodemographic status and medication use. The proxy interview does not include the following assessments: GDS, SF-12, MSPSS and self-rated health. All data (except the 24-hour dietary recall) are collected using KoBotoolbox<sup>47</sup> software which is a freely available application to design surveys for data collection through smart devices

1  
2  
3 and run on Android based platforms. The data are exported into a password protected Excel file on a  
4 daily basis. All responses are typed directly during the interview through Lenovo TAB2 A10-30  
5 tablet. The 24-hour dietary recall is handwritten before being typed to "Tzamert" program <sup>48</sup>, an  
6 Israeli nutrient data program, which enables recording of food intake and calculation of nutrient  
7 intake. In case of any technical difficulties, the questionnaire is completed manually by the  
8 interviewer. A pilot study (n=30) was conducted, after which questionnaires undertook minor  
9 adjustments.

10  
11  
12  
13  
14  
15  
16 Exposure variable: The HEI-2010 score at baseline (T0): Dietary data from the 24-hour dietary recall  
17 questionnaire was entered into the "Tzamert" program. The program uses the nutrient data in the  
18 BINAT program- the Israeli nutrient database which is maintained and updated by the Nutrition  
19 Department of the Ministry of Health. An HEI-2010 score <sup>32</sup> will be calculated for T0 and T1  
20 interviews separately. The HEI-2010 has twelve components, nine of which assess adequacy of the  
21 diet, including 1) total fruit; 2) whole fruit; 3) total vegetables; 4) greens and beans; 5) whole grains;  
22 6) dairy; 7) total protein foods; 8) seafood and plant proteins; and 9) fatty acids. The remaining three:  
23 refined grains, sodium, and empty calories assess dietary components that should be consumed in  
24 moderation. For each component, the respondents receive a minimum score of 0 and a maximum  
25 score of 5 or 10 (for perfect adherence to recommendations); intermediate degrees of adherence are  
26 calculated proportionately. Thus, the overall index has a range from 0 (worst) to 100 <sup>32</sup>.

#### 35 36 Nutritional status assessments:

37  
38 (1) Dietary recall: The multiple-pass 24-hour dietary recall questionnaire is administrated. The  
39 method was originally developed by the USDA in order to limit the extent of underreporting that  
40 occurs with self-reported food intake <sup>49</sup>. The interviewer uses three distinct passes to gather  
41 information about a subject's food intake during the preceding 24 hours. The first pass is termed  
42 the *quick list*; here the interviewees are asked to recall all they had eaten and drunk in the 24-hour  
43 period that preceded the interview. The second pass is termed the *detailed description*. In this  
44 pass, the interviewees are asked to clarify any foods mentioned in the quick list. The third pass is  
45 termed the *review*. The interviewer reviews the list of foods mentioned and probes for additional  
46 eating occasions and clarifies food portion sizes <sup>49</sup>. In order to assist the interviewees in  
47 identifying food types and quantities during the interview, the interviewers use the "Food and  
48 Food Quantities Guide" which is partially based on the Food Guide of the USDA. The guide  
49 includes detailed questions on foods, as well as many photographs of Israeli foods. In order to  
50  
51  
52  
53  
54  
55  
56  
57  
58  
59  
60

1  
2  
3 facilitate quantification of amounts consumed, the interviewers use, in addition to the guide,  
4 identification aids such as a measuring cup, tablespoon, and teaspoon.

- 5  
6  
7 (2) Food security: Household food security is defined as a situation whereby all household members  
8 have access at all times to a food supply which is adequate for a healthy active life. Food security  
9 is assessed using the short 6-item food security USDA questionnaire <sup>50</sup>.
- 10  
11  
12 (3) Malnutrition risk: Modified Mini Nutritional Assessment-Short Form (MNA-SF) <sup>51</sup>. The 6-item  
13 questionnaire is a nutritional screening tool that assesses malnutrition risk.  
14  
15  
16

17 Primary outcomes:

18  
19 Frailty assessment: Frailty at T0 and T1 is assessed by the *Deficit Index* model <sup>18</sup>. Under this model,  
20 frailty is measured by ~40 parameters of symptoms, signs, disease states and disabilities, collectively  
21 referred to as deficits. Adapting the Rockwood index of accumulation of deficits method <sup>7</sup> with T0  
22 data, a Frailty Index (FI) was developed comprising 33 variables. The FI at T1 will comprise the  
23 same variables as T0 FI and will serve as the outcome measure. The FI is a calculation of the  
24 presence or absence of each deficit as a proportion of the total. Dichotomous items are coded as 0 if  
25 the deficit is absent and as 1 if it is present, while ordinal variables are graded into a score between 0  
26 and 1 (0 representing no impairment, 0.5 for minor impairment, and 1 for major impairment). Scores  
27 are then summed up and divided by the total number of variables, yielding a frailty index between 0  
28 and 1, with 1 representing the greatest frailty (a threshold of  $\geq 0.25$  is typically used to define frailty)  
29 <sup>52</sup>. Frailty at T1 is additionally assessed by the *Biological Phenotype* model <sup>5</sup>. Frailty using this  
30 instrument is identified by the presence of three or more of the following components: 1. Shrinking:  
31 weight loss, unintentional, of more than 4.5 Kg, or more than 5% of body weight, in the previous  
32 year; 2. Weakness: grip strength in the lowest 20% (adjusted for sex and body mass index); 3. Poor  
33 endurance and energy: as indicated by self-report of exhaustion; 4. Slowness: the slowest 20% of the  
34 participants in the sample, based on time of a 5-meter walk (adjusted for sex and standing height); 5.  
35 Low physical activity level: a weighted score of kilocalories expended per week will be calculated  
36 based on a Physical Activity Scale for the Elderly (PASE) questionnaire <sup>53</sup>. The lowest quintile of  
37 physical activity will be identified for each gender.  
38  
39  
40  
41  
42  
43  
44  
45  
46  
47  
48  
49  
50  
51  
52

53 Cognitive assessment: Cognitive status is evaluated using the MMSE <sup>26</sup>. The questions are grouped  
54 into seven categories, each representing a different cognitive domain or function: orientation to time  
55 (5 points); orientation to place (5 points); registration of three words (3 points); attention and  
56 calculation (5 points); recall of three words (3 points); language (8 points) and visual construction (1  
57 point) <sup>54</sup>. The MMSE scores (maximum, 30 points) will be education- and age-standardized <sup>46</sup>. Some  
58  
59  
60

1  
2  
3 participants cannot complete test items due to physical disability. The MMSE in these subjects will  
4 be scored out of the items that can be tested<sup>55</sup>. Cognitive impairment will be defined as a score < 24  
5  
6  
7  
8  
9  
10  
11  
12  
13  
14  
15  
16  
17  
18  
19  
20  
21  
22  
23  
24  
25  
26  
27  
28  
29  
30  
31  
32  
33  
34  
35  
36  
37  
38  
39  
40  
41  
42  
43  
44  
45  
46  
47  
48  
49  
50  
51  
52  
53  
54  
55  
56  
57  
58  
59  
60

participants cannot complete test items due to physical disability. The MMSE in these subjects will be scored out of the items that can be tested<sup>55</sup>. Cognitive impairment will be defined as a score < 24<sup>26</sup>. Cognitive decline will be calculated as the MMSE score difference between 2005 and 2017 and will be defined by the 10% of the sample who declined the most (i.e., the 90<sup>th</sup> percentile of decline). MCI will be assessed according to poor performance on MMSE and preserved functional independence<sup>28</sup>. Poor performance on MMSE will be defined by a score of 1.5 standard deviations below the age- and education-specific mean. Preserved functional independence will be defined according to Katz et al. scale of ADL score<sup>27 28</sup>.

### Secondary outcomes:

Health status evaluation: The questionnaire includes data on self-rated health (current status and recent changes) and chronic diseases (e.g., cardiovascular diseases, Parkinson's disease, respiratory diseases, renal disease, cancer, glaucoma and cataract, diabetes mellitus, osteoporosis, hypertension). In addition, the questionnaire includes demographic details, alcohol consumption, and smoking habits information.

Assessment of disabilities: Function is assessed by the Katz scale of Activities of Daily Living<sup>56</sup> based on ability to dress, shower/bathe, sit down and rise from a chair, eat and go to the bathroom. The maximum score is 15, with a score of 5 indicating "no functional limitations," a score of 6-10 indicating some functional limitations, and a score of 11 or more indicating several functional limitations.

Psychosocial assessments: Assessments include depression, perceived social support and health-related quality of life. Depression is evaluated via a 5-item short form of the Yesavage GDS<sup>43</sup>. A score of 2 or higher indicates possible depression. Social support is assessed through the MSPSS<sup>57</sup>, a 12-item questionnaire designed to measure perceptions of support from three sources: family, friends and a significant other (4 items for each source). Answers are given on a 1-7 scale. Weighted scores are calculated by averaging the specific items, each scale (source) individually and the entire questionnaire. A high score represents a high level of perceived social support. Health-related quality of life is evaluated via SF-12<sup>44</sup>, physical (PCS) and mental (MCS) component scores will be constructed from SF-12, using standard (U.S.) and country-specific scoring algorithms.

Drugs: The participants are asked about any medication use on a regular basis (prescription as well as over-the-counter drugs). In the preliminary letter, the participants are asked to prepare their



1  
2  
3 regular medication list. Medications are coded using the ATC (Anatomical Therapeutic and  
4 Chemical) system, developed by the World Health Organization (WHO) <sup>41</sup>.  
5  
6  
7

8 Anthropometric measurements: Include standing height and weight, ulna length (to calculate height,  
9 using recognized formulae <sup>58</sup>), waist and mid-upper arm circumference. Weight measurements are  
10 carried out using an analog scale suitable for weighing up to 130 kg, with accuracy to 0.5 kg. The  
11 scales are placed on an uncarpeted floor and calibrated before weighing. Height is measured using a  
12 spring coil measuring tape. Waist circumference is measured using a flexible tape, with the ability to  
13 measure up to 150 cm, at the narrowest part of the torso, where a "fold" is created when bending  
14 sideways <sup>41</sup>. Mid-upper arm circumference is measured at the mid-point between the tip of the  
15 shoulder and the tip of the elbow (olecranon process and the acromion) using a flexible tape <sup>59</sup>.  
16  
17  
18  
19  
20  
21  
22  
23

24 Blood pressure and pulse measurements: The interviewers conduct blood pressure and pulse  
25 measurements using an electronic monitor. The measurements are carried out according to a protocol  
26 based on recommendations of the American Heart Association <sup>60</sup>. Sitting blood pressure and pulse  
27 are measured in the right arm and is carried out twice, with a minute rest in-between. In case of a  
28 difference of 10% or more between measurements of either systolic or diastolic pressure, a third  
29 measurement is carried out. The final value will be the mean of measurements.  
30  
31  
32  
33  
34  
35

36 Mortality and cause of death: Original participants were linked to the nationwide database of causes  
37 of death (compiled by the Central Bureau of Statistics) via their national identification numbers.  
38 Mortality information is managed by the Ministry of Health. Since 1999, deaths are coded according  
39 to the International Classification of Diseases, Tenth Edition (ICD-10).  
40  
41  
42  
43  
44

#### 45 **Quality assurance**

46 Quality assurance is carried out in various ways: (1) A pilot study (n=30) was conducted, after which  
47 questionnaires and research tools were finalized; (2) Interviewer training: A 2-day seminar were  
48 designed and included standard procedures of administrating research questionnaires, performing  
49 anthropometric measurements and handling data in general; (3) All interviews (under interviewee  
50 consent) are recorded; (4) The study coordinator randomly monitor 5-10% of all interviews; (5)  
51 Dietary data quality assurance includes: *a.* a food recall check: time sequence, completeness of  
52 information, matching of the items in the "Quick List" with those in the "Comprehensive List", and  
53  
54  
55  
56  
57  
58 *b.* following data entry into the Tzamert program, testing will be performed for outliers, in  
59  
60



1  
2  
3 appropriate quantities, lack of correlation between meal times and types, and missing quantities and  
4 incorrect coding.  
5  
6  
7  
8

### 9 **Statistical analysis according to specific aims**

10 Analyses will be performed using SAS version 9.4 (SAS Institute Inc, Cary, NC), IBM SPSS version  
11 25 (SPSS, Chicago, IL) and R version 3.4.4 (R Development Core Team). When appropriate, the  
12 sampling approach will be accounted for through weighting.  
13  
14  
15

- 16  
17 **A.** Frailty categories assessed at baseline (T0; frail vs. robust) will serve as the exposure  
18 variable. Baseline characteristics across frailty index categories will be compared by chi-  
19 squared test for categorical variables and student-t-test for continuous variables. Cox  
20 proportional hazards regression models <sup>61</sup> will be fitted to evaluate the hazard ratios for  
21 death. Several adjustment methods will be applied including traditional multivariable  
22 adjustment and propensity score adjustment <sup>62</sup>. The incremental discriminatory ability of  
23 frailty index over demographic and SES variables in predicting death during a 12-year  
24 follow up will be evaluated by the c-statistic. Assessing the c-statistic and its corresponding  
25 standard error from Cox proportional hazards models will be performed with methods  
26 proposed by Harrell et al. <sup>63</sup>.  
27  
28  
29  
30  
31  
32  
33  
34 **B.** Baseline characteristics across HEI categories as measured at T0 will be compared by chi-  
35 squared test for categorical variables and analysis of variance for continuous variables. The  
36 predictive role of nutritional indices in the long-term incidence of frailty, as assessed by two  
37 methods, cognitive decline and other outcomes will be assessed using logistic regression  
38 models <sup>64</sup>. Adjustment will be made for sociodemographic, clinical, and psychosocial  
39 variables, via either multivariable adjustment or propensity score <sup>65</sup>. Of the 1,799  
40 participants in the initial survey, many are no longer able to participate in the T1 interview  
41 (death, loss to follow-up, non-response). Because frailty status could not be assessed among  
42 the latter group, selection bias is introduced <sup>66</sup>. This bias will be addressed through an  
43 adaptation of a marginal structural model, applying inverse probability weights <sup>66 67</sup>.  
44 Accordingly, the probability of original participants to take part in the second interview will  
45 be estimated. Each observation will then be weighted by the reciprocal (i.e., the inverse) of  
46 the predicted probability of participating at T1.  
47  
48  
49  
50  
51  
52  
53  
54  
55  
56  
57  
58  
59  
60

1  
2  
3 C. Nutrient intake will be calculated using the "Tzameret" program, as described previously.  
4 Data of nutrient consumption among current study participants will be compared with  
5 International recommendation, i.e., Dietary Reference Intake (DRI) <sup>68 69</sup>. Prevalence of  
6 malnutrition risk at T1 will be assessed by MNA-SF <sup>51</sup>. Changes in nutrient consumption  
7 will be evaluated by descriptive statistics and paired t-test will be used to evaluate the mean  
8 difference between HEI scores at T0 and T1.  
9  
10  
11  
12  
13  
14  
15

### 16 **Approach to missing data**

17 The distribution of missing values will be examined. Depending on the extent of the problem, several  
18 approaches will be considered. In case of a low rate of missing data, a complete case analysis will be  
19 considered, i.e., removal of subjects where any of the predictor variables are missing. Otherwise, we  
20 will employ multiple imputation methodology <sup>70</sup>. For this purpose, the number of complete  
21 (imputed) datasets will be defined by the following formula:  $(1+\lambda/m)^{-1} = \text{efficiency}$ , where  $\lambda$  is the  
22 fraction of missing information and  $m$  the number of datasets to impute. We will assume an  
23 efficiency of 0.975. Missing values will be replaced by imputed values based on models  
24 incorporating demographic, socioeconomic, psychosocial, and clinical variables. The results of these  
25 datasets will then be combined using Rubin's rules <sup>70</sup>.  
26  
27  
28  
29  
30  
31  
32  
33  
34

### 35 **Estimated statistical power**

36 Among 1,800 initial participants, some 1,115 survived so far. About 600 subjects are expected to be  
37 re-interviewed, assuming a response rate of 55% for T1 interview. Considering frailty prevalence of  
38 over 35% at the estimated average age of 84 years in T1 interview<sup>71</sup>, about 250 frail subjects can be  
39 expected. This sample size is sufficient for detecting an adjusted odds ratio for frailty of  $\leq 0.60$   
40 between the upper and lower HEI score tertiles (significance level at 5% and power of 80%).  
41 Association of this magnitude was previously reported. For example, a previous 6-year follow-up  
42 study showed that adherence to MD diet was associated with lower odds of developing frailty [OR =  
43 0.30 (95% CI: 0.14, 0.66)] <sup>38</sup>.  
44  
45  
46  
47  
48  
49  
50  
51

### 52 **Patient and Public Involvement**

53 Patients and or public are not involved.  
54  
55  
56  
57  
58  
59  
60

### **Ethical aspect**

Ethical approval for the study was obtained from the Helsinki Committee of Chaim Sheba Medical Center at Tel Hashomer and the Ethical Committee of Tel-Aviv University. Potential participants receive a preliminary letter with a description of the study, a request to participate and an announcement that telephone contact would be made in the near future. In addition, the letter provides the telephone number of the research coordinator for further questions. After a minimum of two weeks, potential participants are contacted by telephone in order to set an interview appointment for those who agree to participate. The interview does not involve clinical procedures, and no human biological specimens are collected. Therefore, participants' burden is minimal. Each interviewee is asked to sign an informed consent form.

### **Dissemination**

The findings of the study will be published in peer-reviewed journals and will be presented at national and international conferences.

### **Discussion**

The ILSA sets out to transform a large national survey of older adults with a broad-spectrum data into a cohort study with a specific age-related questionnaire including comprehensive geriatric assessment, evaluation of general health and quality of life. Obtaining data at two points in time, more than a decade apart, will allow us to evaluate long-term changes in older adults population and examine dietary role in the context of healthy aging and adverse clinical outcomes. Participants' estimated current mean age of 84 years old, defined as the "oldest-old", have over past decades been the most rapidly expanding segment of the population in developed countries and also the most susceptible to disease and disability<sup>72</sup>. Only few studies have explicitly examined the concept of robust aging among the oldest-old and investigated its heterogeneity in functioning, cognitive abilities, diet quality, and nutritional status changes. Both frailty and cognitive decline are at the core definition of healthy aging<sup>19 20 73-75</sup> and are highly prevalent in older people; still, as their status varies considerably among older adults, important issues such as how they develop, are they preventable, and can they be detected reliably have yet to be defined. Obviously, our study has several limitations. Of the 1,799 participants in the original survey, many are no longer able to participate in T1 interview (death, loss to follow-up, non-response). Because frailty status and cognitive state could not be assessed among the latter group, selection bias is introduced. This bias will be addressed through applying inverse probability weights based on estimated propensity score. Another limitation is the fact that dietary quality assessment (exposure variable) is based on a single

1  
2  
3 24-hour dietary recall. Although evaluation of the HEI score is suitable for a single 24-hour dietary  
4 recall intake <sup>76 77</sup>, individual diets can vary greatly from day to day. Furthermore, we cannot preclude  
5 that participants may have changed their dietary habits during the follow-up. The 24-hour dietary  
6 recall tool is widely used to assess dietary intake in population studies since 1965 <sup>78</sup>, with studies  
7 indicating its accuracy for estimating energy intake <sup>49 79</sup>. In addition, the multiple-pass 24-hour  
8 dietary recall technique, which is used in our study, manage to limit the extent of underreporting that  
9 occurs with single self-reported food intake <sup>49 80</sup>. Like most similar studies, self-report information  
10 and information form a proxy can lead to misclassification bias that may lead to under or  
11 overestimation of dietary recall, frailty and other measures. Nevertheless, examining the role of diet  
12 quality in the context of healthy aging and adverse clinical outcomes may help to broaden our  
13 knowledge regarding the older adults population, provide a scientific basis on which policymakers  
14 can rely and pave the way for early therapeutic interventions.  
15  
16  
17  
18  
19  
20  
21  
22  
23  
24  
25  
26  
27  
28  
29  
30  
31  
32  
33  
34  
35  
36  
37  
38  
39  
40  
41  
42  
43  
44  
45  
46  
47  
48  
49  
50  
51  
52  
53  
54  
55  
56  
57  
58  
59  
60

review only

## **Reference:**

1. Keehan SP, Lazenby HC, Zezza MA, et al. Age Estimates in the National Health Accounts. *Health Care Financ Rev* 2004;26(2):1-16. [published Online First: 2004/01/01]
2. Bureau USC. Population Projections of the United States by Age, Sex, Race, and Hispanic Origin: 1995 to 2050: U.S. Census Bureau, 2004.
3. Peel NM, McClure RJ, Bartlett HP. Behavioral determinants of healthy aging. *Am J Prev Med* 2005;28(3):298-304. doi: 10.1016/j.amepre.2004.12.002
4. Peel N, Bartlett H, McClure R. Healthy ageing: how is it defined and measured? *Australas J Ageing* 2004;23(3):115-19. doi: 10.1111/j.1741-6612.2004.00035.x
5. Fried LP, Tangen CM, Walston J, et al. Frailty in older adults: Evidence for a phenotype. *J Gerontol a-Biol* 2001;56(3):M146-M56.
6. Ferrucci L, Guralnik JM, Studenski S, et al. Designing randomized, controlled trials aimed at preventing or delaying functional decline and disability in frail, older persons: a consensus report. *Journal of the American Geriatrics Society* 2004;52(4):625-34. doi: 10.1111/j.1532-5415.2004.52174.x [published Online First: 2004/04/07]
7. Mitnitski AB, Mogilner AJ, Rockwood K. Accumulation of deficits as a proxy measure of aging. *ScientificWorldJournal* 2001;1:323-36.
8. Garcia-Gonzalez JJ, Garcia-Pena C, Franco-Marina F, et al. A frailty index to predict the mortality risk in a population of senior Mexican adults. *BMC Geriatr* 2009;9:47. doi: 10.1186/1471-2318-9-471471-2318-9-47 [pii] [published Online First: 2009/11/06]
9. Rockwood K, Howlett SE, MacKnight C, et al. Prevalence, attributes, and outcomes of fitness and frailty in community-dwelling older adults: Report from the Canadian study of health and aging. *J Gerontol A Biol Sci Med Sci* 2004;59(12):1310-17. [published Online First: 2005/02/09]
10. Freiheit EA, Hogan DB, Eliasziw M, et al. Development of a frailty index for patients with coronary artery disease. *Journal of the American Geriatrics Society* 2010;58(8):1526-31. doi: 10.1111/j.1532-5415.2010.02961.x [published Online First: 2010/07/17]
11. Song X, Mitnitski A, Rockwood K. Prevalence and 10-year outcomes of frailty in older adults in relation to deficit accumulation. *Journal of the American Geriatrics Society* 2010;58(4):681-87. doi: 10.1111/j.1532-5415.2010.02764.x [published Online First: 2010/03/30]
12. Lee DH, Buth KJ, Martin BJ, et al. Frail patients are at increased risk for mortality and prolonged institutional care after cardiac surgery. *Circulation* 2010;121(8):973-8. doi: 10.1161/circulationaha.108.841437 [published Online First: 2010/02/18]
13. Rockwood K, Song X, MacKnight C, et al. A global clinical measure of fitness and frailty in elderly people. *CMAJ* 2005;173(5):489-95. doi: 10.1503/cmaj.050051 [published Online First: 2005/09/01]
14. Rodriguez-Manas L, Feart C, Mann G, et al. Searching for an operational definition of frailty: a Delphi method based consensus statement: the frailty operative definition-consensus conference project. *J Gerontol A Biol Sci Med Sci* 2013;68(1):62-7. doi: 10.1093/gerona/gls119 [published Online First: 2012/04/19]

15. Ensrud KE, Ewing SK, Taylor BC, et al. Comparison of 2 frailty indexes for prediction of falls, disability, fractures, and death in older women. *Arch Intern Med* 2008;168(4):382-9. doi: 10.1001/archinternmed.2007.113 [published Online First: 2008/02/27]
16. Hubbard RE, O'Mahony MS, Woodhouse KW. Characterising frailty in the clinical setting--a comparison of different approaches. *Age Ageing* 2009;38(1):115-9. doi: 10.1093/ageing/afn252 [published Online First: 2008/11/15]
17. Sternberg SA, Wershof Schwartz A, Karunanathan S, et al. The identification of frailty: a systematic literature review. *J Am Geriatr Soc* 2011;59(11):2129-38. doi: 10.1111/j.1532-5415.2011.03597.x [published Online First: 2011/11/19]
18. Rockwood K, Andrew M, Mitnitski A. A comparison of two approaches to measuring frailty in elderly people. *J Gerontol A Biol Sci Med Sci* 2007;62(7):738-43. [published Online First: 2007/07/20]
19. Cosco TD, Armstrong JJ, Stephan BCM, et al. Successful Aging and Frailty: Mutually Exclusive Paradigms or Two Ends of a Shared Continuum? *Can Geriatr J* 2015;18(1):35-36. doi: 10.5770/cgj.18.131
20. Woo J, Leung J, Zhang TM. Successful Aging and Frailty: Opposite Sides of the Same Coin? *J Am Med Dir Assoc* 2016;17(9):797-801. doi: DOI 10.1016/j.jamda.2016.04.015
21. Rowe JW, Kahn RL. Successful aging. *Gerontologist* 1997;37(4):433-40. doi: DOI 10.1093/geront/37.4.433
22. Fiocco AJ, Yaffe K. Defining Successful Aging The Importance of Including Cognitive Function Over Time. *Arch Neurol* 2010;67(7):876-80.
23. DeCarli C. Mild cognitive impairment: prevalence, prognosis, aetiology, and treatment. *Lancet Neurol* 2003;2(1):15-21.
24. Gauthier S, Reisberg B, Zaudig M, et al. Mild cognitive impairment. *Lancet* 2006;367(9518):1262-70. doi: Doi 10.1016/S0140-6736(06)68542-5
25. Petersen RC, Doody R, Kurz A, et al. Current concepts in mild cognitive impairment. *Arch Neurol* 2001;58(12):1985-92.
26. Folstein MF, Folstein SE, McHugh PR. "Mini-mental state". A practical method for grading the cognitive state of patients for the clinician. *J Psychiat Res* 1975;12(3):189-98.
27. Petersen RC, Stevens JC, Ganguli M, et al. Practice parameter: early detection of dementia: mild cognitive impairment (an evidence-based review). Report of the Quality Standards Subcommittee of the American Academy of Neurology. *Neurology* 2001;56(9):1133-42.
28. Langa KM, Levine DA. The diagnosis and management of mild cognitive impairment: a clinical review. *Jama* 2014;312(23):2551-61.
29. Ahmed T, Haboubi N. Assessment and management of nutrition in older people and its importance to health. *Clinical interventions in aging* 2010;5:207-16. [published Online First: 2010/08/17]
30. Shahar D, Shai I, Vardi H, et al. Dietary intake and eating patterns of elderly people in Israel: who is at nutritional risk? *European journal of clinical nutrition* 2003;57(1):18-25. doi: 10.1038/sj.ejcn.1601523 [published Online First: 2003/01/28]



- 1  
2  
3 31. Diet, Nutrition, and the Prevention of Chronic Diseases. Geneva, Switzerland: World Heart Organization,  
4 1990.
- 5  
6 32. Patterson RE, Haines PS, Popkin BM. Diet quality index: capturing a multidimensional behavior. *J Am Diet*  
7 *Assoc* 1994;94(1):57-64. doi: 0002-8223(94)92042-7 [pii] [published Online First: 1994/01/01]
- 8  
9 33. Guenther PM, Casavale KO, Reedy J, et al. Update of the Healthy Eating Index: HEI-2010. *J Acad Nutr Diet*  
10 2013;113(4):569-80. doi: 10.1016/j.jand.2012.12.016
- 11  
12 34. Deckelbaum RJ, Fisher EA, Winston M, et al. Summary of a scientific conference on preventive nutrition:  
13 pediatrics to geriatrics. *Circulation* 1999;100(4):450-6.
- 14  
15 35. Bollwein J, Diekmann R, Kaiser MJ, et al. Distribution but not amount of protein intake is associated with  
16 frailty: a cross-sectional investigation in the region of Nurnberg. *Nutr J* 2013;12 doi: Artn  
17 10910.1186/1475-2891-12-109
- 18  
19 36. Willett WC, Sacks F, Trichopoulos A, et al. Mediterranean Diet Pyramid - a Cultural Model for Healthy  
20 Eating. *Am J Clin Nutr* 1995;61(6):1402s-06s.
- 21  
22 37. Leon-Munoz LM, Guallar-Castillon P, Lopez-Garcia E, et al. Mediterranean Diet and Risk of Frailty in  
23 Community-Dwelling Older Adults. *J Am Med Dir Assoc* 2014;15(12):899-903. doi:  
24 10.1016/j.jamda.2014.06.013
- 25  
26 38. Talegawkar SA, Bandinelli S, Bandeen-Roche K, et al. A Higher Adherence to a Mediterranean-Style Diet Is  
27 Inversely Associated with the Development of Frailty in Community-Dwelling Elderly Men and  
28 Women. *J Nutr* 2012;142(12):2161-66. doi: 10.3945/jn.112.165498
- 29  
30 39. Scarmeas N, Stern Y, Mayeux R, et al. Mediterranean diet, Alzheimer disease, and vascular mediation.  
31 *Arch Neurol* 2006;63(12):1709-17.
- 32  
33 40. Luchsinger JA, Mayeux R. Dietary factors and Alzheimer's disease. *Lancet Neurol* 2004;3(10):579-87.
- 34  
35 41. ICDC. Mabat Zahav National Health and Nutrition Survey age 65 and over 2005-6.  
36 [https://www.health.gov.il/PublicationsFiles/Mabat\\_2005-2006-a.pdf](https://www.health.gov.il/PublicationsFiles/Mabat_2005-2006-a.pdf), 2011.
- 37  
38 42. Zimet GD, Powell SS, Farley GK, et al. Psychometric Characteristics of the Multidimensional Scale of  
39 Perceived Social Support. *J Pers Assess* 1990;55(3-4):610-17. doi: DOI  
40 10.1207/s15327752jpa5503&4\_17
- 41  
42 43. Hoyl MT, Alessi CA, Harker JO, et al. Development and testing of a five-item version of the Geriatric  
43 Depression Scale. *J Am Geriatr Soc* 1999;47(7):873-78.
- 44  
45 44. Ware JE, Kosinski M, Keller SD. A 12-item short-form health survey - Construction of scales and  
46 preliminary tests of reliability and validity. *Med Care* 1996;34(3):220-33. doi: Doi 10.1097/00005650-  
47 199603000-00003
- 48  
49 45. Health IMo. [Available from:  
50 [https://www.health.gov.il/UnitsOffice/ICDC/mabat/Pages/Mabat\\_Gold.aspx](https://www.health.gov.il/UnitsOffice/ICDC/mabat/Pages/Mabat_Gold.aspx).
- 51  
52 46. Crum RM, Anthony JC, Bassett SS, et al. Population-Based Norms for the Mini-Mental-State-Examination  
53 by Age and Educational-Level. *Jama-J Am Med Assoc* 1993;269(18):2386-91. doi: DOI  
54 10.1001/jama.269.18.2386

- 1
  - 2
  - 3
  - 4
  - 5
  - 6
  - 7
  - 8
  - 9
  - 10
  - 11
  - 12
  - 13
  - 14
  - 15
  - 16
  - 17
  - 18
  - 19
  - 20
  - 21
  - 22
  - 23
  - 24
  - 25
  - 26
  - 27
  - 28
  - 29
  - 30
  - 31
  - 32
  - 33
  - 34
  - 35
  - 36
  - 37
  - 38
  - 39
  - 40
  - 41
  - 42
  - 43
  - 44
  - 45
  - 46
  - 47
  - 48
  - 49
  - 50
  - 51
  - 52
  - 53
  - 54
  - 55
  - 56
  - 57
  - 58
  - 59
  - 60
47. KoBotoolbox software [Available from: <http://www.kobotoolbox.org/>].
48. Tzameret software: Nutrition Department of the Ministry of Health [Available from: <https://www.health.gov.il/Subjects/FoodAndNutrition/Nutrition/professionals/Pages/Tzameret.aspx>]
49. Johnson RK, Driscoll P, Goran MI. Comparison of multiple-pass 24-hour recall estimates of energy intake with total energy expenditure determined by the doubly labeled water method in young children. *J Am Diet Assoc* 1996;96(11):1140-4.
50. Blumberg SJ, Bialostosky K, Hamilton WL, et al. The effectiveness of a short form of the Household Food Security Scale. *Am J Public Health* 1999;89(8):1231-4. [published Online First: 1999/08/05]
51. Bauer JM, Kaiser MJ, Anthony P, et al. The Mini Nutritional Assessment--its history, today's practice, and future perspectives. *Nutr Clin Pract* 2008;23(4):388-96. doi: 10.1177/088453360832113223/4/388 [pii] [published Online First: 2008/08/07]
52. Myers V, Drory Y, Gerber Y, et al. Clinical relevance of frailty trajectory post myocardial infarction. *Eur J Prev Cardiol* 2014;21(6):758-66.
53. Washburn RA, Smith KW, Jette AM, et al. The Physical Activity Scale for the Elderly (PASE): development and evaluation. *J Clin Epidemiol* 1993;46(2):153-62.
54. Tombaugh TN, McIntyre NJ. The mini-mental state examination: a comprehensive review. *J Am Geriatr Soc* 1992;40(9):922-35.
55. Vertesi A, Lever JA, Molloy DW, et al. Standardized mini-mental state examination - Use and interpretation. *Can Fam Physician* 2001;47:2018-23.
56. Katz S, Downs TD, Cash HR, et al. Progress in development of the index of ADL. *Gerontologist* 1970;10(1):20-30. [published Online First: 1970/01/01]
57. Zimet GD, Dahlem NW, Zimet SG, et al. The Multidimensional Scale of Perceived Social Support. *J Pers Assess* 1988;52(1):30-41. doi: DOI 10.1207/s15327752jpa5201\_2
58. Gauld LM, Kappers J, Carlin JB, et al. Height prediction from ulna length. *Dev Med Child Neurol* 2004;46(7):475-80. doi: 10.1017/S0012162204000787
59. Tsai AC, Chang T-L, Yang T-W, et al. A modified mini nutritional assessment without BMI predicts nutritional status of community-living elderly in Taiwan. *The journal of nutrition, health & aging* 2010;14(3):183-89.
60. Smith L. New AHA recommendations for blood pressure measurement. *Am Fam Physician* 2005;72(7):1391-+.
61. Cox DR. Regression Models and Life-Tables. *J R Stat Soc B* 1972;34(2):187-+.
62. Austin PC. An Introduction to Propensity Score Methods for Reducing the Effects of Confounding in Observational Studies. *Multivar Behav Res* 2011;46(3):399-424. doi: Pii 93847000010.1080/00273171.2011.568786



- 1  
2  
3 63. Harrell FE, Lee KL, Mark DB. Multivariable prognostic models: Issues in developing models, evaluating  
4 assumptions and adequacy, and measuring and reducing errors. *Stat Med* 1996;15(4):361-87. doi:  
5 Doi 10.1002/(Sici)1097-0258(19960229)15:4<361::Aid-Sim168>3.0.Co;2-4  
6  
7 64. Dominguez-Almendros S, Benitez-Parejo N, Gonzalez-Ramirez AR. Logistic Regression Models. *Allergol*  
8 *Immunopath* 2011;39(5):295-305. doi: 10.1016/j.aller.2011.05.002  
9  
10 65. Rosenbaum PR, Rubin DB. The Central Role of the Propensity Score in Observational Studies for Causal  
11 Effects. *Biometrika* 1983;70(1):41-55. doi: DOI 10.1093/biomet/70.1.41  
12  
13 66. Hernan MA, Hernandez-Diaz S, Robins JM. A structural approach to selection bias. *Epidemiology*  
14 2004;15(5):615-25. doi: 10.1097/01.ede.0000135174.63482.43  
15  
16 67. Robins JM, Hernan MA, Brumback B. Marginal structural models and causal inference in epidemiology.  
17 *Epidemiology* 2000;11(5):550-60. doi: Doi 10.1097/00001648-200009000-00011  
18  
19 68. Trumbo P, Schlicker S, Yates AA, et al. Dietary reference intakes for energy, carbohydrate, fiber, fat, fatty  
20 acids, cholesterol, protein and amino acids. *J Am Diet Assoc* 2002;102(11):1621-30. doi: Doi  
21 10.1016/S0002-8223(02)90346-9  
22  
23 69. Trumbo P, Yates AA, Schlicker S, et al. Dietary reference intakes: Vitamin A, vitamin K, arsenic, boron,  
24 chromium, copper, iodine, iron, manganese, molybdenum, nickel, silicon, vanadium, and zinc. *J Am*  
25 *Diet Assoc* 2001;101(3):294-301. doi: Doi 10.1016/S0002-8223(01)00078-5  
26  
27 70. Rubin DB. Multiple imputation for nonresponse in surveys: John Wiley & Sons 2004.  
28  
29 71. Collard RM, Boter H, Schoevers RA, et al. Prevalence of frailty in community-dwelling older persons: a  
30 systematic review. *J Am Geriatr Soc* 2012;60(8):1487-92. doi: 10.1111/j.1532-5415.2012.04054.x  
31 [published Online First: 2012/08/14]  
32  
33 72. Fried LP. Epidemiology of aging. *Epidemiol Rev* 2000;22(1):95-106.  
34  
35 73. Rosado-Artalejo C, Carnicero JA, Losa-Reyna J, et al. Cognitive Performance across 3 Frailty Phenotypes:  
36 Toledo Study for Healthy Aging. *J Am Med Dir Assoc* 2017;18(9):785-90. doi:  
37 10.1016/j.jamda.2017.04.008  
38  
39 74. Shlisky J, Bloom DE, Beaudreault AR, et al. Nutritional Considerations for Healthy Aging and Reduction in  
40 Age-Related Chronic Disease. *Adv Nutr* 2017;8(1):17-26. doi: 10.3945/an.116.013474  
41  
42 75. Allerhand M, Gale CR, Deary IJ. The Dynamic Relationship Between Cognitive Function and Positive Well-  
43 Being in Older People: A Prospective Study Using the English Longitudinal Study of Aging. *Psychol*  
44 *Aging* 2014;29(2):306-18. doi: 10.1037/a0036551  
45  
46 76. Guenther PM, Reedy J, Krebs-Smith SM, et al. Evaluation of the Healthy Eating Index-2005. *J Am Diet*  
47 *Assoc* 2008;108(11):1854-64. doi: 10.1016/j.jada.2008.08.011  
48  
49 77. Guenther PM, Kirkpatrick SI, Reedy J, et al. The Healthy Eating Index-2010 Is a Valid and Reliable Measure  
50 of Diet Quality According to the 2010 Dietary Guidelines for Americans. *The Journal of Nutrition*  
51 2014;144(3):399-407. doi: 10.3945/jn.113.183079  
52  
53  
54  
55  
56  
57  
58  
59  
60

- 1  
2  
3 78. Zimmerman TP, Hull SG, McNutt S, et al. Challenges in converting an interviewer-administered food  
4 probe database to self-administration in the National Cancer Institute automated self-administered  
5 24-hour recall (ASA24). *J Food Compos Anal* 2009;22:S48-S51. doi: 10.1016/j.jfca.2009.02.003  
6  
7  
8 79. Jonnalagadda SS, Mitchell DC, Smiciklas-Wright H, et al. Accuracy of energy intake data estimated by a  
9 multiple-pass, 24-hour dietary recall technique. *J Am Diet Assoc* 2000;100(3):303-11. doi: Doi  
10 10.1016/S0002-8223(00)00095-X  
11  
12 80. Raper N, Perloff B, Ingwersen L, et al. An overview of USDA's dietary intake data system. *J Food Compos*  
13 *Anal* 2004;17(3-4):545-55. doi: 10.1016/j.jfca.2004.02.013  
14  
15  
16  
17  
18  
19  
20  
21  
22  
23  
24  
25  
26  
27  
28  
29  
30  
31  
32  
33  
34  
35  
36  
37  
38  
39  
40  
41  
42  
43  
44  
45  
46  
47  
48  
49  
50  
51  
52  
53  
54  
55  
56  
57  
58  
59  
60

For peer review only

### **Figure legends:**

Figure 1: Study design sketch. <sup>1</sup>Mini Mental State Examination; <sup>2</sup>General Health Questionnaire; <sup>3</sup>Activities of Daily Living; <sup>4</sup>Mini Nutritional Assessment-Short Form; <sup>5</sup>Healthy Eating Index; <sup>6</sup>Geriatric Depression Scale; <sup>7</sup>Short Form of health-related-quality of life.

Figure 2: Sample size flow chart.

### **Footnotes**

#### **Authors' contributions**

AG, study coordinator of the ILSA, drafted the manuscript, assisted in the conception of the study and led field activities and study monitoring; UG, co-investigator for the ILSA, conceived of the study concept and design and supervised the study; T Shohat, co-investigator of the ILSA and physician-in-charge of the study; LKB, principal investigator of MABAT ZAHAV survey; T Shimony, coordinator of MABAT ZAHAV survey; YG, principal investigator of the ILSA, conceived of the study concept and design and co-drafted the manuscript. All authors revised, reviewed and approved the final paper.

#### **Funding**

This study is supported by grant no.3-12787 from the Chief Scientist Office, Ministry of Health (principal investigator, YG), and The Bircher-Benner Foundation, Tel Aviv University (principal investigator, YG).

#### **Competing interests**

The authors declare that they have no competing interests.

#### **Acknowledgments**

We are indebted to all those who agree to participate in the study for their cooperation and patience answering our comprehensive questionnaire and their willingness to let us into their homes. We are grateful for our professional and dedicated study team: Osnat Fried, B.Sc., Michal Weber, B.Sc., RD, Rana Younis, B.Sc., RD and Polina Pokrass, B.A, RN. This work was performed in partial fulfillment of the requirements for a Ph.D. degree of Abigail Goshen, Sackler Faculty of Medicine, Tel Aviv University, Israel.

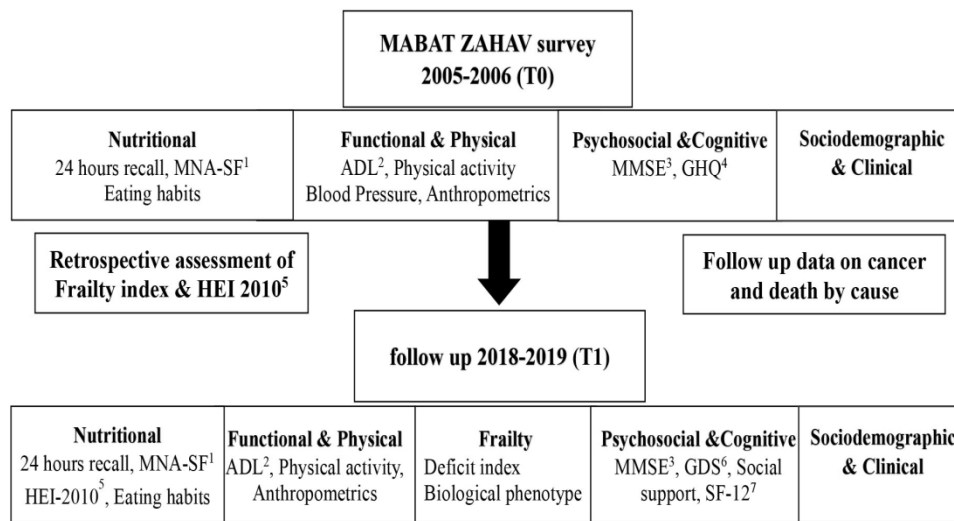

25 Figure 1: Research design sketch.<sup>1</sup>Mini Mental State Examination; <sup>2</sup>General Health Questionnaire; <sup>3</sup>Activities  
26 of Daily Living; <sup>4</sup>Mini Nutritional Assessment– Short Form; <sup>5</sup>Healthy Eating Index; <sup>6</sup>Geriatric Depression  
27 Scale; <sup>7</sup>Short Form of health-related-quality of life.  
28

29 162x91mm (300 x 300 DPI)

1  
2  
3  
4  
5  
6  
7  
8  
9  
10  
11  
12  
13  
14  
15  
16  
17  
18  
19  
20  
21  
22  
23  
24  
25  
26  
27  
28  
29  
30  
31  
32  
33  
34  
35  
36  
37  
38  
39  
40  
41  
42  
43  
44  
45  
46  
47  
48  
49  
50  
51  
52  
53  
54  
55  
56  
57  
58  
59  
60



Figure 2. Sample size flow chart.

91x111mm (300 x 300 DPI)
